# Supplementary material
Source: publisher figshare collection journal article supplement (https://acs.figshare.com/ndownloader/files/4127491)
Supplement: Supplementary file 1 [file 4127491]

# Remarkable Improvement Achieved by Imidazole Derivatives in Ruthenium-Catalyzed Hydroesterification of Alkenes Using Formates

Hideyuki Konishi<sup>†</sup>, Tsuyoshi Ueda<sup>†,‡</sup>, Takashi Muto<sup>†</sup>, and Kei Manabe<sup>\*,†</sup>

<sup>†</sup>School of Pharmaceutical Sciences, University of Shizuoka, 52-1 Yada, Suruga-ku, Shizuoka 422-8526, Japan and <sup>‡</sup>Process Technology Research Laboratories, Pharmaceutical Technology Division, Daiichi Sankyo Co., Ltd., 1-12-1 Shinomiya, Hiratsuka, Kanagawa 254-0014, Japan

Email: manabe@u-shizuoka-ken.ac.jp

## Supporting Information 1

### Table of Contents

|     |                                                                                                         |
|-----|---------------------------------------------------------------------------------------------------------|
| S2  | General method and materials                                                                            |
| S3  | Investigation of reaction conditions                                                                    |
| S4  | Preparation of compounds                                                                                |
| S14 | General experimental procedure                                                                          |
| S16 | Analytical data of hydroesterification products                                                         |
| S27 | NMR spectra of newly obtained compounds (substrates and products of intermolecular hydroesterification) |
| S71 | References                                                                                              |

## **1. General method and materials**

**General.** All reactions were performed in oven-dried or flame-dried glassware under argon atmosphere. Reactions were monitored by TLC on Merck silica gel 60 F254 plates visualized by UV lamp at 254 nm. Column chromatography was performed on Merck silica gel 60 and preparative TLC was performed on Merck silica gel 60 F254 0.5 mm plates. NMR spectra were measured on a JEOL AL-400 NMR spectrometer at 400 MHz for  $^1\text{H}$  spectra and 100 MHz for  $^{13}\text{C}$  spectra, and for  $^1\text{H}$  NMR, tetramethylsilane (TMS) ( $\delta = 0$ ) in  $\text{CDCl}_3$  served as an internal standard. For  $^{13}\text{C}$  NMR,  $\text{CDCl}_3$  ( $\delta = 77.0$ ) served as an internal standard. Infrared spectra were measured on a SHIMADZU IR Prestige-21 spectrometer (ATR). High-resolution mass spectra (HRMS) were measured on a JEOL JMS-T100TD time-of-flight mass spectrometer (DART). Melting point was measured using a YAZAWA MICRO MELTING POINT BY-1.

**Materials.**  $\text{Ru}_3(\text{CO})_{12}$  was purchased from Strem and used as received. Mesitylene was purchased from TCI and purified by distillation prior to use. Compounds **2a-g**, and **3a-b** were purchased from TCI and used as received. Alkyl and aryl formates **1a-h** were synthesized according to the literature.<sup>1</sup> Analytical data of compounds **1a**,<sup>2</sup> **1b-c** and **1f-g**,<sup>3</sup> **1e**,<sup>4</sup> **1h**,<sup>5</sup> **3e**,<sup>6</sup> **3g**,<sup>7</sup> and **3h**<sup>8</sup> were identical to those reported in precedent literature.

## 2. Investigation of reaction conditions

We have further investigated reaction conditions (Table S1). Then we found that ratio of catalyst—imidazole ( $\text{Ru}_3(\text{CO})_{12}$  and **3i**) and equivalence of reagents (**1a** and **2a**) were important to promote hydroesterification reaction as well as to suppress decarbonylation of **1a**. Other Ru sources did not work at all.

**Table S1. Investigation of Reaction Conditions.**

| $  \begin{array}{c}  \text{BnO}-\text{C}(=\text{O})-\text{H} \\  \textbf{1a} \\  (\text{y equiv})  \end{array}  +  \begin{array}{c}  \text{CH}_2=\text{CH}-\text{PMP} \\  \textbf{2a} \\  (\text{z equiv})  \end{array}  \xrightarrow[\text{PMP = 4-methoxyphenyl}]{\begin{array}{c} \text{Ru}_3(\text{CO})_{12} \text{ (5 mol \%)} \\ \textbf{3i} \text{ (x mol \%)} \end{array}}  \begin{array}{c}  \text{BnO}-\text{C}(=\text{O})-\text{CH}_2\text{CH}_2-\text{PMP} \\  \textbf{4aa}  \end{array}  +  \begin{array}{c}  \text{BnO}-\text{C}(=\text{O})-\text{CH}(\text{Me})-\text{PMP} \\  \textbf{4ab}  \end{array}  $ <p style="text-align: center;">mesitylene or neat<br/>135 °C, 24 h</p> |              |              |              |            |                                    |                             |                                   |
|---------------------------------------------------------------------------------------------------------------------------------------------------------------------------------------------------------------------------------------------------------------------------------------------------------------------------------------------------------------------------------------------------------------------------------------------------------------------------------------------------------------------------------------------------------------------------------------------------------------------------------------------------------------------------------------------------|--------------|--------------|--------------|------------|------------------------------------|-----------------------------|-----------------------------------|
| entry                                                                                                                                                                                                                                                                                                                                                                                                                                                                                                                                                                                                                                                                                             | x<br>(mol %) | y<br>(equiv) | z<br>(equiv) | solvent    | yield of <b>4</b> (%) <sup>a</sup> | <b>4aa:4ab</b> <sup>b</sup> | yield of<br>BnOH (%) <sup>c</sup> |
| 1                                                                                                                                                                                                                                                                                                                                                                                                                                                                                                                                                                                                                                                                                                 | 5            | 1.5          | 1.0          | mesitylene | 39                                 | 82:18                       | 13                                |
| 2                                                                                                                                                                                                                                                                                                                                                                                                                                                                                                                                                                                                                                                                                                 | 15           | 1.5          | 1.0          | mesitylene | 69                                 | 37:63                       | <1                                |
| 3                                                                                                                                                                                                                                                                                                                                                                                                                                                                                                                                                                                                                                                                                                 | 30           | 1.5          | 1.0          | mesitylene | 66                                 | 43:57                       | 51                                |
| 4                                                                                                                                                                                                                                                                                                                                                                                                                                                                                                                                                                                                                                                                                                 | 15           | 1.5          | 1.0          | neat       | 74                                 | 39:61                       | 57                                |
| 5                                                                                                                                                                                                                                                                                                                                                                                                                                                                                                                                                                                                                                                                                                 | 15           | 1.0          | 1.5          | mesitylene | 80                                 | 59:41                       | 3                                 |
| 6                                                                                                                                                                                                                                                                                                                                                                                                                                                                                                                                                                                                                                                                                                 | 15           | 1.0          | 1.5          | neat       | 89                                 | 54:46                       | <1                                |
| 7                                                                                                                                                                                                                                                                                                                                                                                                                                                                                                                                                                                                                                                                                                 | 15           | 1.0          | 1.0          | neat       | 77                                 | 44:56                       | 14                                |
| 8 <sup>d</sup>                                                                                                                                                                                                                                                                                                                                                                                                                                                                                                                                                                                                                                                                                    | 15           | 1.5          | 1.0          | mesitylene | N.R. <sup>e</sup>                  | —                           | 7                                 |
| 9 <sup>f</sup>                                                                                                                                                                                                                                                                                                                                                                                                                                                                                                                                                                                                                                                                                    | 15           | 1.5          | 1.0          | mesitylene | trace                              | —                           | 7                                 |

<sup>a</sup>Isolated yield. <sup>b</sup>Ratio determined by <sup>1</sup>H NMR analysis of isolated mixture of **4aa** and **4ab**. <sup>c</sup>Yield of BnOH (based on **2a**) determined by crude <sup>1</sup>H NMR analysis. <sup>d</sup> $\text{Ru}(\text{cod})\text{Cl}_2$  and **3g** were used instead of  $\text{Ru}_3(\text{CO})_{12}$  and **3i**. <sup>e</sup>No reaction. <sup>f</sup> $\text{Ru}(\text{PPh}_3)\text{HCl}$  and **3g** were used instead of  $\text{Ru}_3(\text{CO})_{12}$  and **3i**.

### 3. Preparation of compounds

#### Preparation of imidazole derivatives.

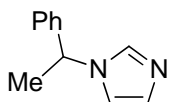

##### 1-(1-Phenylethyl)-1H-imidazole (**3e**)<sup>6</sup>

To a solution of 38% aq. glyoxal (5.04 g, 33.0 mmol, 2.0 equiv) and ammonium acetate (2.54 g, 33.0 mmol, 2.0 equiv) in MeOH (17 mL) was added (±)-1-phenylethylamine (2.00 g, 16.5 mmol) and 35% aq. formaldehyde (2.83 g, 33.0 mmol, 2.0 equiv). The mixture was warmed to 80 °C and stirred for 14 h. The reaction mixture was cooled to RT and diluted with toluene. The solution was washed with 10% aq. NaOH and the aqueous layer was extracted with toluene. The combined organic layer was washed with brine, dried over MgSO<sub>4</sub>, filtered, and concentrated. The obtained residue was purified by column chromatography on silica gel (EtOAc) to afford the desired product **3e** (0.89 g, 5.18 mmol, 31%) as a pale yellow oil.

<sup>1</sup>H NMR (400 MHz, CDCl<sub>3</sub>) δ 7.52 (s, 1H), 7.28-7.22 (m, 3H), 7.13 (m, 2H), 7.09 (d, 1H, *J* = 2.0 Hz), 5.27 (q, 1H, *J* = 6.9 Hz), 1.78 (d, 3H, *J* = 7.2 Hz).

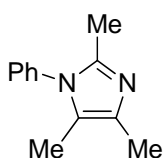

##### 2,4,5-Trimethyl-1-phenyl-1H-imidazole (**3f**)

To a solution of 2,3-butanedione (3.70 g, 43.0 mmol, 2.0 equiv) and ammonium acetate (3.31 g, 33.0 mmol, 2.0 equiv) in MeOH (17 mL) was added aniline (2.00 g, 21.5 mmol) and 90% aq. acetaldehyde (2.10 g, 43.0 mmol, 2.0 equiv). The mixture was warmed to 80 °C and stirred for 20 h. The reaction mixture was cooled to RT and diluted with toluene. The solution was washed with 10% aq. NaOH and the aqueous layer was extracted with toluene. The combined organic layers were washed with brine, dried over MgSO<sub>4</sub>, filtered, and concentrated. The obtained residue was purified by column chromatography on silica gel (EtOAc) to afford the desired product **3f** (1.23 g, 6.60 mmol, 31%) as a dark red oil.

<sup>1</sup>H NMR (400 MHz, CDCl<sub>3</sub>) δ 7.53-7.41 (m, 3H), 7.19-7.16 (m, 2H), 2.18 (s, 6H), 1.92 (s, 3H); <sup>13</sup>C NMR (100 MHz, CDCl<sub>3</sub>) δ 142.8, 137.2, 131.6, 129.4, 128.4, 127.5, 123.0, 13.8, 12.5 and 9.4; IR (ATR) 2920, 1597, 1499, 1404, 1387, 762 and 698 cm<sup>-1</sup>; HRMS (DART) [M+H]<sup>+</sup> calcd for C<sub>12</sub>H<sub>15</sub>N<sub>2</sub>: 187.1230; found 187.1240.

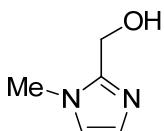

##### (1-Methyl-1H-imidazol-2-yl)methanol (**3g**)<sup>8</sup>

This compound was synthesized according to reported procedure. Yield: 73%.

<sup>1</sup>H NMR (400 MHz, CDCl<sub>3</sub>) δ 7.26 (s, 1H), 6.90 (s, 1H), 6.84 (s, 1H), 4.66 (s, 2H), 3.72 (s, 3H).

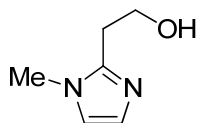

**2-(1-Methyl-1*H*-imidazol-2-yl)ethanol (3h)<sup>8</sup>**

This compound was synthesized according to reported procedure. Yield: 4%.

<sup>1</sup>H NMR (400 MHz, CDCl<sub>3</sub>) δ 6.92 (s, 1H), 6.81 (s, 1H), 4.04 (t, 2H, *J* = 5.6 Hz), 3.64 (s, 1H), 3.58 (s, 3H), 2.83 (t, 2H, *J* = 5.9 Hz).

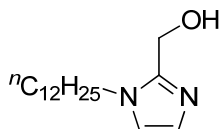

**(1-Dodecyl-1*H*-imidazol-2-yl)methanol (3i)<sup>9</sup>**

This compound was synthesized from 1-dodecylimidazole according to reported procedure.<sup>8</sup> Yield: 50%.

<sup>1</sup>H NMR (400MHz, CDCl<sub>3</sub>) δ 6.92 (d, 1H, *J* = 1.5 Hz), 6.86 (d, 1H, *J* = 1.0 Hz), 4.66 (s, 2H), 3.96 (t, 2H, *J* = 7.6 Hz), 1.79-1.76 (m, 2H), 1.31-1.25 (m, 18H), 0.88 (t, 3H, *J* = 6.8 Hz); <sup>13</sup>C NMR (100 MHz, CDCl<sub>3</sub>) δ 147.4, 127.1, 120.1, 56.3, 46.2, 32.0, 31.2, 29.7, 29.6, 29.4, 29.3, 26.8, 22.8 and 14.2.

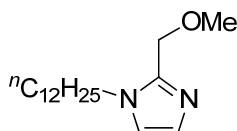

**1-Dodecyl-2-(methoxymethyl)-1*H*-imidazole (3j)**

To a solution of **3i** (213 mg, 0.800 mmol) in THF (5.0 mL) was added NaH (64.0 mg, 1.60 mmol, 2.0 equiv) at 0 °C. The mixture was warmed to RT and stirred for 45 min. MeI (100 μL, 1.60 mmol, 2.0 equiv) was added to the mixture. After the reaction mixture was stirred at RT for 2 h, EtOAc and H<sub>2</sub>O were added carefully. The solution was separated and the aqueous layer was extracted with EtOAc. The combined organic layers were washed with brine, dried over MgSO<sub>4</sub>, filtered, and concentrated. The obtained residue was purified by PTLT (CHCl<sub>3</sub>/MeOH 1/1) to afford the desired product **3j** (172 mg, 0.613 mmol, 77%) as a pale yellow oil.

<sup>1</sup>H NMR (400 MHz, CDCl<sub>3</sub>) δ 6.97 (s, 1H), 6.91 (s, 1H), 4.53 (s, 2H), 3.96 (t, 2H, *J* = 7.3 Hz), 3.32 (s, 3H), 1.81-1.72 (m, 2H), 1.35-1.23 (m, 18H), 0.88 (t, 3H, *J* = 6.8 Hz); <sup>13</sup>C NMR (100 MHz, CDCl<sub>3</sub>) δ 143.9, 127.4, 120.3, 66.2, 57.5, 45.9, 31.7, 30.8, 29.50, 29.48, 29.4, 29.3, 29.2, 29.0, 26.5, 22.5 and 13.9; IR (ATR) 2920, 1492, 1462, 1188, 1087, 987 and 732 cm<sup>-1</sup>; HRMS (DART) [M+H]<sup>+</sup> calcd for C<sub>17</sub>H<sub>33</sub>N<sub>2</sub>O: 281.2593; found 281.2603.

### Preparation of formates.

Formates **1a-h** were synthesized by formylation of the corresponding alcohols.<sup>3</sup> <sup>1</sup>H NMR spectra of compounds **1a-c**, **1e-f**, and **1g** were exactly identical to the reported data.

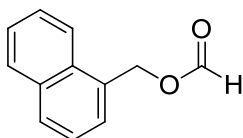

#### Naphthalen-1-ylmethyl formate (**1d**)

1-Naphthylmethanol (1.58 g, 10.0 mmol) was added to formic acid (4.0 mL) and the mixture was stirred at 60 °C for 3.5 h. The reaction mixture was diluted with CH<sub>2</sub>Cl<sub>2</sub> and H<sub>2</sub>O. The solution was separated and the aqueous layer was extracted with CH<sub>2</sub>Cl<sub>2</sub>, washed with saturated NaHCO<sub>3</sub> aq., dried over MgSO<sub>4</sub>, filtered, and concentrated. The obtained residue was purified by column chromatography on silica gel (hexane/EtOAc 100/1) to afford **1d** (0.586 g, 3.15 mmol, 32%) as a colorless oil.

<sup>1</sup>H NMR (400 MHz, CDCl<sub>3</sub>) δ 8.14 (s, 1H), 7.98 (t, 1H, J = 7.8 Hz), 7.85 (t, 2H, J = 7.8 Hz), 7.56-7.41 (m, 4H), 5.63 (s, 2H); <sup>13</sup>C NMR (100 MHz, CDCl<sub>3</sub>) δ 160.7, 133.6, 131.4, 130.6, 129.5, 128.7, 127.7, 126.6, 125.9, 125.1, 123.3 and 63.8; IR (ATR) 1716, 1145, and 771 cm<sup>-1</sup>; HRMS (DART) [M+H]<sup>+</sup> calcd for C<sub>12</sub>H<sub>11</sub>O<sub>2</sub>: 187.0754; found 187.0754.

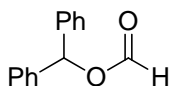

#### Benzhydryl formate (**1h**)<sup>10</sup>

Formic acid (1.70 mL, 45.0 mmol, 4.5 equiv) was added to acetic anhydride (4.70 mL, 50.0 mmol, 5.0 equiv) at RT. The resulting mixture was stirred at 60 °C for 1 h and cooled to RT. Benzhydrol (1.21 mL, 10.0 mmol) was added to the solution and the mixture was stirred for 0.5 h. The reaction mixture was diluted with Et<sub>2</sub>O, washed with H<sub>2</sub>O three times, dried over MgSO<sub>4</sub>, filtered, and concentrated. The obtained residue was purified by column chromatography on silica gel (hexane/EtOAc 20/1) to afford the desired product **1h** (1.18 g, 7.84 mmol, 78%) as a colorless oil.

<sup>1</sup>H NMR (400 MHz, CDCl<sub>3</sub>) δ 8.23 (s, 1H), 7.36-7.29 (m, 10H), 7.00 (s, 1H)

### Preparation of substrates for intramolecular hydroesterification.

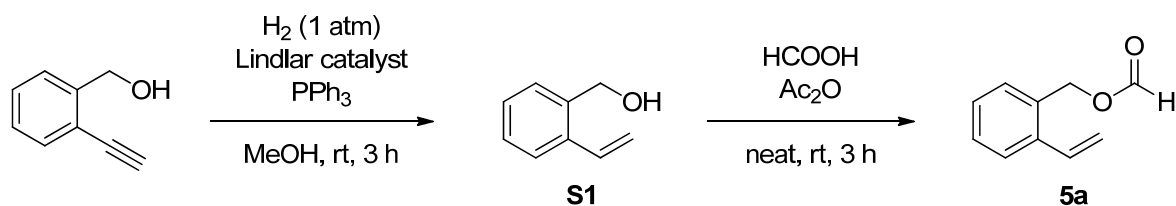

#### (2-Vinylphenyl)methanol (**S1**)

To a solution of 2-ethynylbenzyl alcohol (2.00 g, 15.1 mmol) in MeOH (14 mL) was added triphenylphosphine (150 mg, 0.57 mmol) and 5% palladium on calcium carbonate (30 mg). The mixture was stirred at RT under H<sub>2</sub> atmosphere (1 atm) for 3 h. The reaction mixture was filtered through Celite pad and concentrated. The obtained residue was purified by column chromatography on silica gel (hexane/EtOAc 6/1) to afford the desired product **S1** (2.03 g, 15.1 mmol, 100% yield) as a colorless oil.

<sup>1</sup>H NMR (400 MHz, CDCl<sub>3</sub>) δ 7.51 (dd, 1H, *J* = 6.8, 2.0 Hz), 7.34 (dd, 1H, *J* = 6.8, 2.0 Hz), 7.31-7.23 (m, 2H), 7.03 (dd, 1H, *J* = 17.5, 10.8 Hz), 5.70 (dd, 1H, *J* = 17.5, 1.2 Hz), 5.34 (dd, 1H, *J* = 10.8, 1.2 Hz), 4.72 (s, 2H), 2.11 (br s, 1H); <sup>13</sup>C NMR (100 MHz, CDCl<sub>3</sub>) δ 137.5, 136.6, 133.7, 128.3, 128.1, 127.9, 125.9, 116.4 and 63.3; IR (ATR) 3318, 1483, 1452, 1413, 945, 912, 760 and 729 cm<sup>-1</sup>; HRMS (DART) [M+H]<sup>+</sup> calcd for C<sub>9</sub>H<sub>11</sub>O: 135.0805; found 135.0810.

#### 2-Vinylbenzyl formate (**5a**)

Formic acid (5.80 mL, 153 mmol, 10 equiv) was added to acetic anhydride (11.6 mL, 122 mmol, 8.0 equiv) at RT. The resulting mixture was stirred at 60 °C for 1 h and cooled to RT. **S1** (2.03 g, 15.3 mmol) was added to the solution and the mixture was stirred for 3 h. The reaction mixture was diluted with Et<sub>2</sub>O, washed with H<sub>2</sub>O three times, dried over MgSO<sub>4</sub>, filtered, and concentrated. The obtained residue was purified by column chromatography on silica gel (hexane/EtOAc 15/1) to afford the desired product **5a** (2.16 g, 13.3 mmol, 87%) as a colorless oil.

<sup>1</sup>H NMR (400 MHz, CDCl<sub>3</sub>) δ 8.13 (s, 1H), 7.55 (d, 1H, *J* = 7.2 Hz), 7.38-7.33 (m, 2H), 7.27 (ddd, 1H, *J* = 7.6, 7.2, 1.2 Hz), 6.97 (dd, 1H, *J* = 17.6, 11.2 Hz), 5.70 (dd, 1H, *J* = 17.6, 0.8 Hz), 5.38 (dd, 1H, *J* = 11.2, 0.8 Hz), 5.28 (s, 2H); <sup>13</sup>C NMR (100 MHz, CDCl<sub>3</sub>) δ 160.8, 137.6, 133.6, 132.2, 130.2, 129.2, 128.0, 126.2, 117.1 and 63.7; IR (ATR) 1717, 1144, 916, 772 and 750 cm<sup>-1</sup>; HRMS (DART) [M+H]<sup>+</sup> calcd for C<sub>10</sub>H<sub>11</sub>O<sub>2</sub>: 163.0754; found 163.0760.

### General procedure of the synthesis of compounds **5b-5d**.

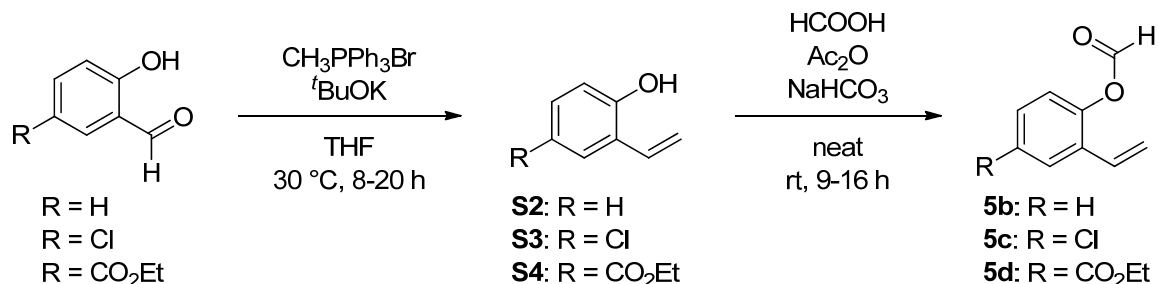

**Method 1:** To a solution of methyltriphenylphosphonium bromide (18.9 mmol, 2.3 equiv) in dry THF (30 mL) was added 1 M <sup>t</sup>BuOK solution in THF (18.9 mL, 2.3 equiv). The mixture was stirred at RT for 2 h and cooled to -78 °C. Corresponding aldehyde or ketone (8.20 mmol) was added, warmed to RT slowly and stirred at 30 °C for 8-20 h. The reaction mixture was quenched with 1 M HCl aq., diluted with EtOAc, washed with brine. The obtained solution was dried over MgSO<sub>4</sub>, filtered, and concentrated. The obtained residue was purified by column chromatography on silica gel.

**Method 2:** Formic acid (23.6 mmol, 10 equiv) was added to acetic anhydride (18.9 mmol, 8 equiv) at RT. The resulting mixture was stirred at 60 °C for 1 h and cooled to RT. Phenol derivative synthesized above (2.40 mmol) and sodium hydrogen carbonate (4.80 mmol, 2.0 equiv) were added to the solution and the mixture was stirred for 9-16 h. The reaction mixture was diluted with Et<sub>2</sub>O, washed with H<sub>2</sub>O three times, dried over MgSO<sub>4</sub>, filtered, and concentrated. The obtained residue was purified by column chromatography on neutral silica gel to afford the desired product.

### 2-Vinylphenol (S2)<sup>11</sup>

**S2** was obtained from *o*-hydroxybenzaldehyde using method 1 as a colorless oil. Yield: 100% yield.

<sup>1</sup>H NMR (400 MHz, CDCl<sub>3</sub>) δ 7.36 (d, 1 H, *J* = 7.5 Hz), 7.14-7.10 (m, 1 H), 6.92-6.87 (m, 2 H), 6.77 (d, 1 H, *J* = 7.9 Hz), 5.72 (d, 1 H, *J* = 17.6 Hz), 5.32 (d, 1 H, *J* = 11.4 Hz), 5.14 (s, 1H).

### 2-Vinylphenyl formate (5b)

**5b** was obtained from **S2** using method 2 as a colorless oil. Yield: 100% yield.

<sup>1</sup>H NMR (400 MHz, CDCl<sub>3</sub>) δ 8.32 (s, 1H), 7.60 (dd, 1H, *J* = 7.2, 1.6 Hz), 7.33-7.23 (m, 2H), 7.08 (dd, 1H, *J* = 7.6, 1.2 Hz), 6.80 (dd, 1H, *J* = 17.6, 11.2 Hz), 5.78 (dd, 1H, *J* = 17.6, 0.8 Hz), 5.37 (dd, 1H, *J* = 11.2, 0.8 Hz); <sup>13</sup>C NMR (100 MHz, CDCl<sub>3</sub>) δ 159.4, 147.3, 130.2, 130.1, 129.0, 126.8, 126.8, 122.2, 117.1; IR (ATR) 1759, 1736, 1483, 1450, 1211, 1173, 1107, 1086, 918 and 762 cm<sup>-1</sup>; HRMS (DART) [M+H]<sup>+</sup> calcd for C<sub>9</sub>H<sub>9</sub>O<sub>2</sub>: 149.0598; found 149.0600.

### 4-Chloro-2-vinylphenol (S3)<sup>12</sup>

**S3** was obtained from 3-chlorosalicylaldehyde using method 1 as a colorless oil. Yield: 100% yield.

<sup>1</sup>H NMR (400 MHz, CDCl<sub>3</sub>) δ 7.36 (d, 1 H, *J* = 7.5 Hz), 7.14-7.10 (m, 1 H), 6.92-6.87 (m, 1 H), 6.77 (d, 1 H, *J* = 7.9 Hz), 5.72 (d, 1 H, *J* = 17.6 Hz), 5.32 (d, 1 H, *J* = 11.4 Hz), 5.14 (s, 1H).

### 4-Chloro-2-vinylphenyl formate (5c)

**5c** was obtained from **S3** using method 2 as a colorless oil. Yield: 42%

<sup>1</sup>H NMR (400 MHz, CDCl<sub>3</sub>) δ 8.30 (s, 1H), 7.56 (d, 1H, *J* = 2.4 Hz), 7.26 (dd, 1H, *J* = 8.4, 2.4 Hz), 7.04 (d, 1H, *J* = 8.0 Hz), 6.72 (dd, 1H, *J* = 17.6, 11.2 Hz), 5.78 (d, 1H, *J* = 17.6 Hz), 5.42 (d, 1H, *J* = 11.6 Hz); <sup>13</sup>C NMR (100 MHz, CDCl<sub>3</sub>) δ 158.6, 145.3, 132.1, 131.6, 128.9, 128.5, 126.4, 123.4, 118.1; IR (ATR) 1734, 1474, 1408, 1211, 1167, 1111, 1076 and 1042 cm<sup>-1</sup>; HRMS (DART) [M+H]<sup>+</sup> calcd for C<sub>9</sub>H<sub>8</sub>ClO<sub>2</sub>: 183.0208; found 183.0208.

### Ethyl 4-hydroxy-3-vinylbenzoate (S4)

**S4** was obtained from 5-ethoxycarbonylsalicylaldehyde, which was synthesized according to previous report,<sup>13</sup> using method 1 as white needle (m.p. 105 °C). Yield: 86%.

<sup>1</sup>H NMR (400 MHz, CDCl<sub>3</sub>) δ 8.11 (d, 1H, *J* = 2.4 Hz), 7.84 (dd, 1H, *J* = 8.8, 2.4 Hz), 6.93 (dd, 1H, *J* = 17.2, 11.2 Hz), 6.84 (d, 1H, *J* = 8.8 Hz), 5.91 (s, 1H), 5.83 (dd, 1H, *J* = 17.2, 1.2 Hz), 5.42 (dd, 1H, *J* =



11.2, 1.6 Hz), 4.36 (q, 2H,  $J = 7.6$  Hz), 1.39 (t, 3H,  $J = 7.6$  Hz);  $^{13}\text{C}$  NMR (100 MHz,  $\text{CDCl}_3$ )  $\delta$  167.4, 157.7, 130.7, 130.6, 129.2, 124.9, 122.3, 116.4, 115.7, 61.2 and 14.3; IR (ATR) 3362, 1686, 1603, 1273, 752 and 635  $\text{cm}^{-1}$ ; HRMS (DART)  $[\text{M}+\text{H}]^+$  calcd for  $\text{C}_{11}\text{H}_{13}\text{O}_3$ : 193.0859; found 193.0867.

#### Ethyl 4-(formyloxy)-3-vinylbenzoate (**5d**)

**5d** was obtained from **S4** using method 2 as a colorless oil. Yield: 99%.

$^1\text{H}$  NMR (400 MHz,  $\text{CDCl}_3$ )  $\delta$  8.33 (s, 1H), 8.29 (d, 1H,  $J = 2.0$  Hz), 7.98 (dd, 1H,  $J = 8.8, 2.0$  Hz), 7.18 (d, 1H,  $J = 8.8$  Hz), 6.80 (dd, 1H,  $J = 17.2, 11.2$  Hz), 5.90 (dd, 1H,  $J = 17.2, 0.8$  Hz), 5.45 (dd, 1H,  $J = 11.2, 0.8$  Hz), 4.40 (q, 2H,  $J = 6.8$  Hz), 1.41 (t, 3H,  $J = 6.8$  Hz);  $^{13}\text{C}$  NMR (100 MHz,  $\text{CDCl}_3$ )  $\delta$  165.5, 158.3, 150.1, 130.1, 129.8, 129.2, 128.9, 128.2, 122.1, 118.1, 61.2, 14.2; IR (ATR) 1744, 1713, 1287, 1248, 1171, 1105, 1074 and 758  $\text{cm}^{-1}$ ; HRMS (DART)  $[\text{M}+\text{H}]^+$  calcd for  $\text{C}_{12}\text{H}_{13}\text{O}_4$ : 221.0809; found 221.0801.

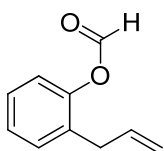

#### 2-Allylphenyl formate (**5e**)

**5e** was obtained from 2-allylphenol by formylation analogous to synthesis of **5b** as a colorless oil. Yield: 93%.

$^1\text{H}$  NMR (400 MHz,  $\text{CDCl}_3$ )  $\delta$  8.30 (s, 1H), 7.30-7.21 (m, 3H), 7.07 (dd, 1H,  $J = 8.0, 2.0$  Hz), 5.91 (ddt, 1H,  $J = 17.2, 10.0, 6.4$  Hz), 5.09 (dd, 1H,  $J = 10.0, 1.2$  Hz), 5.04 (ddt, 1H,  $J = 17.2, 1.6, 1.2$  Hz), 3.34 (d, 2H,  $J = 6.4$  Hz);  $^{13}\text{C}$  NMR (100 MHz,  $\text{CDCl}_3$ )  $\delta$  159.1, 147.9, 135.4, 131.5, 130.4, 127.3, 126.3, 121.6, 116.2 and 34.1; IR (ATR) 1761, 1736, 1487, 1209, 1167, 1117 and 742  $\text{cm}^{-1}$ ; HRMS (DART)  $[\text{M}+\text{H}]^+$  calcd for  $\text{C}_{10}\text{H}_{11}\text{O}_2$ : 163.0754; found 163.0758.

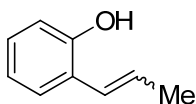

#### 2-(Prop-1-en-1-yl)phenol (**S5**)<sup>14</sup>

Compound **S5** was synthesized according to previous report ( $E:Z = 80:20$ ).<sup>15</sup>

$^1\text{H}$  NMR (400 MHz,  $\text{CDCl}_3$ )  $\delta$  7.32 (dd, 1H,  $J = 8.0, 1.2$  Hz), 7.10 (dt, 1H,  $J = 8.0, 1.2$  Hz), 6.89 (t, 1H,  $J = 8.0$  Hz), 6.80 (d, 1H,  $J = 8.0$  Hz), 6.61 (dq, 1H,  $J = 15.9, 1.4$  Hz, (*E*)), 6.42 (d, 1H,  $J = 11.2$  Hz, (*Z*)), 6.21 (dq, 1H,  $J = 15.9, 6.6$  Hz, (*E*)), 6.02 (dq, 1H,  $J = 11.2, 7.0$  Hz, (*Z*)), 5.02 (s, 1H), 1.92 (dd, 3H,  $J = 6.5, 1.3$  Hz, (*E*)), 1.72 (dd, 3H,  $J = 6.5, 1.3$  Hz, (*Z*)).

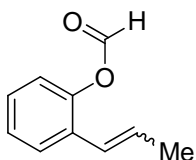

#### 2-(Prop-1-en-1-yl)phenyl formate (**5f**)

**5f** ( $E:Z = 80:20$ ) was obtained from **S5** ( $E:Z = 80:20$ ) by formylation analogous to synthesis of **5b** as a colorless oil. Yield: 85%.

**(E)-isomer:**  $^1\text{H}$  NMR (400 MHz,  $\text{CDCl}_3$ )  $\delta$  8.27 (s, 1H), 7.51-7.47 (m, 1H), 7.22-7.17 (m, 2H), 7.04-6.99 (m, 1H), 6.44 (dd, 1H,  $J = 16.0, 2.0$  Hz), 6.24 (dq, 1H,  $J = 16.0, 6.8$  Hz), 1.86 (dd, 3H,  $J = 6.8, 1.6$  Hz);  $^{13}\text{C}$  NMR (100 MHz,  $\text{CDCl}_3$ )  $\delta$  159.3, 146.5, 130.2, 128.9, 127.6, 126.6, 126.5, 123.8, 121.8 and 18.7.

**(Z)-isomer:**  $^1\text{H}$  NMR (400 MHz,  $\text{CDCl}_3$ )  $\delta$  8.19 (s, 1H), 7.33 (dd, 1H,  $J = 7.2, 1.6$  Hz), 7.27-7.16 (m, 2H), 7.08 (dd, 1H,  $J = 7.6, 1.6$  Hz), 6.33 (dd, 1H,  $J = 11.6, 1.2$  Hz), 5.86 (dq, 1H,  $J = 11.6, 6.8$  Hz), 1.75 (dd, 3H,  $J = 6.8, 2.0$  Hz);  $^{13}\text{C}$  NMR (100 MHz,  $\text{CDCl}_3$ )  $\delta$  159.1, 147.5, 130.5, 129.9, 129.4, 127.9, 126.0, 123.8, 121.7 and 14.4.

**(E)/(Z)-mixture:** IR (ATR) 1759, 1736, 1483, 1445, 1215, 1173, 1113, 962 and 740  $\text{cm}^{-1}$ ; HRMS (DART)  $[\text{M}+\text{H}]^+$  calcd for  $\text{C}_{10}\text{H}_{11}\text{O}_2$ : 163.0754; found 163.0763.

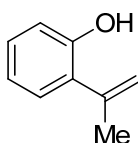

**2-(Prop-1-en-2-yl)phenol (S6)**<sup>16</sup>

**S6** was obtained from *o*-hydroxyacetophenone by Wittig reaction analogous to synthesis of **S2** as a colorless oil. Yield: 87%.

$^1\text{H}$  NMR (400 MHz,  $\text{CDCl}_3$ )  $\delta$  7.17-7.14 (m, 2H), 6.95-6.88 (m, 2H), 5.69 (s, 1H), 5.42 (t, 1H,  $J = 1.7$  Hz), 5.16 (s, 1H), 2.13 (s, 3H).

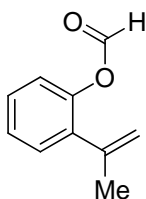

**2-(Prop-1-en-2-yl)phenyl formate (5g)**

**5g** was obtained from **S6** by formylation analogous to synthesis of **5b** as a colorless oil. Yield: 88%.

$^1\text{H}$  NMR (400 MHz,  $\text{CDCl}_3$ )  $\delta$  8.23 (s, 1H), 7.31-7.21 (m, 3H), 7.06 (dd, 1H,  $J = 7.6, 1.6$  Hz), 5.21 (q, 1H,  $J = 1.2$  Hz), 5.04 (s, 1H), 2.06 (t, 3H,  $J = 1.2$  Hz);  $^{13}\text{C}$  NMR (100 MHz,  $\text{CDCl}_3$ )  $\delta$  159.4, 146.6, 141.2, 136.4, 129.5, 128.3, 126.5, 122.1, 116.8 and 23.3; IR (ATR) 1761, 1738, 1487, 1445, 1186, 1103, 905 and 762  $\text{cm}^{-1}$ ; HRMS (DART)  $[\text{M}+\text{H}]^+$  calcd for  $\text{C}_{10}\text{H}_{11}\text{O}_2$ : 163.0754; found 163.0757.

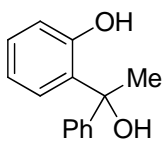

**2-(1-Hydroxy-1-phenylethyl)phenol (S7)**<sup>17</sup>

To a solution of *o*-hydroxyacetophenone (2.0 g, 14.7 mmol) in dry THF (20 mL) was added 1 M  $\text{PhMgBr}$  solution (32.3 mL, 32.3 mmol, 2.2 equiv) at 0  $^{\circ}\text{C}$ . The mixture was warmed to reflux temperature and stirred for 8 h. The reaction mixture was cooled to 0  $^{\circ}\text{C}$  and then 15%  $\text{AcOH}$  aq. and toluene were added. The aqueous layer was extracted with toluene three times and the combined organic layers were washed with brine, dried over  $\text{MgSO}_4$ , filtered, and concentrated. The obtained residue was purified by column chromatography on silica gel to afford the desired product **S7** (2.2 g, 10.3 mmol, 70%) as a yellow solid (m.p. 110  $^{\circ}\text{C}$ ).

$^1\text{H}$  NMR (400 MHz,  $\text{CDCl}_3$ )  $\delta$  8.44 (s, 1H), 7.36-7.13 (m, 6H), 6.98 (d, 1H,  $J = 7.2$  Hz), 6.82 (d, 2H,  $J = 7.5$  Hz), 3.18 (s, 1H), 1.94 (s, 3H).

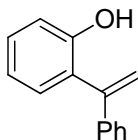

**2-(1-phenylvinyl)phenol (S8)**<sup>18</sup>

To a solution of **S7** (1.60 g, 7.50 mmol) in benzene (10 mL) was added  $\text{I}_2$  (10.0 mg). The mixture was stirred at reflux temperature for 13 h. The reaction mixture was cooled to RT, washed with  $\text{Na}_2\text{S}_2\text{O}_3$  aq. and brine, dried over  $\text{MgSO}_4$ , filtered, and concentrated. The obtained residue was purified by column chromatography on silica gel (hexane/EtOAc 9/1) to afford the desired product **S8** (1.40 g, 7.20 mmol, 96%) as a colorless oil.

$^1\text{H}$  NMR (400 MHz,  $\text{CDCl}_3$ )  $\delta$  7.38-7.30 (m, 5H), 7.28-7.21 (m, 1H), 7.13 (dd, 1H,  $J = 7.5, 1.6$  Hz), 6.96-6.90 (m, 2H), 5.86 (d, 1H,  $J = 1.2$  Hz), 5.41 (d, 1H,  $J = 1.2$  Hz), 5.17 (s, 1H).

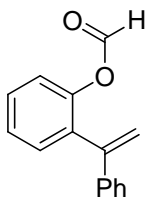

**2-(1-Phenylvinyl)phenyl formate (5h)**

**5h** was obtained from **S8** by formylation analogous to synthesis of **5b** as a colorless oil. Yield: 100% yield.

$^1\text{H}$  NMR (400 MHz,  $\text{CDCl}_3$ )  $\delta$  7.89 (s, 1H), 7.41-7.24 (m, 8H), 7.11 (d, 1H,  $J = 8.4$  Hz), 5.72 (d, 1H,  $J = 1.2$  Hz), 5.33 (d, 1H,  $J = 1.2$  Hz);  $^{13}\text{C}$  NMR (100 MHz,  $\text{CDCl}_3$ )  $\delta$  158.7, 147.3, 145.3, 140.2, 134.7, 131.4, 129.0, 128.3, 127.9, 126.7, 126.6, 122.4 and 116.9; IR (ATR) 1736, 1485, 1447, 1188, 1115, 1090, 907, 760 and 700  $\text{cm}^{-1}$ ; HRMS (DART)  $[\text{M}+\text{H}]^+$  calcd for  $\text{C}_{15}\text{H}_{13}\text{O}_2$ : 225.0910; found 225.0903.

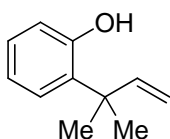

**2-(2-Methylbut-3-en-2-yl)phenol (S9)**<sup>19</sup>

Compound **S9** was synthesized according to previous report.<sup>20</sup>

$^1\text{H}$  NMR (400 MHz,  $\text{CDCl}_3$ )  $\delta$  7.22-7.03 (m, 2H), 6.84-6.73 (m, 2H), 6.12 (dd, 1H,  $J = 17.6, 10.6$  Hz), 5.78 (s, 1H), 5.26 (d, 1H,  $J = 17.6$  Hz), 5.21 (d, 1H,  $J = 10.6$  Hz), 1.36 (s, 6H).

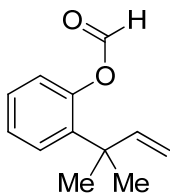

**2-(2-Methylbut-3-en-2-yl)phenyl formate (5i)**

**5i** was obtained from **S9** by formylation analogous to synthesis of **5b** as a colorless oil. Yield: 71%.

<sup>1</sup>H NMR (400 MHz, CDCl<sub>3</sub>) δ 8.17 (s, 1H), 7.44 (dd, 1H, *J* = 8.0, 2.4 Hz), 7.30-7.20 (m, 2H), 6.99 (dd, 1H, *J* = 7.6, 2.0 Hz), 6.01-5.94 (m, 1H), 5.02-4.94 (m, 2H), 1.47 (s, 6H); <sup>13</sup>C NMR (100 MHz, CDCl<sub>3</sub>) δ 160.1, 148.5, 147.0, 139.2, 127.7, 127.5, 126.4, 123.3, 111.2, 40.4 and 27.7; IR (ATR) 1761, 1740, 1485, 1443, 1184, 1099 and 752 cm<sup>-1</sup>; HRMS (DART) [M+H]<sup>+</sup> calcd for C<sub>12</sub>H<sub>15</sub>O<sub>2</sub>: 191.1067; found 191.1072.

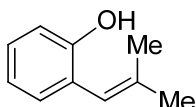

#### 2-(2-Methylprop-1-en-1-yl)phenol (**S10**)

**S10** was obtained from *o*-hydroxyacetophenone by Wittig reaction using isopropyltriphenylphosphonium iodide analogous to synthesis of **S2** as a colorless oil. Yield: 71%.

<sup>1</sup>H NMR (400 MHz, CDCl<sub>3</sub>) δ 7.14 (ddd, 1H, *J* = 7.2, 6.8, 2.0 Hz), 7.04 (dd, 1H, *J* = 7.2, 1.6 Hz), 6.90-6.84 (m, 2H), 6.12 (s, 1H), 5.08 (s, 1H), 1.94 (d, 3H, *J* = 0.8 Hz), 1.68 (d, 3H, *J* = 1.6 Hz); <sup>13</sup>C NMR (100 MHz, CDCl<sub>3</sub>) δ 152.8, 140.5, 129.8, 128.2, 124.6, 120.1, 118.7, 114.8, 25.8 and 19.4; IR (ATR) 3422, 2970, 2911, 1576, 1485, 1445, 1215, 1171, 1096 and 748 cm<sup>-1</sup>; HRMS (ESI) [M+H]<sup>+</sup> calcd for C<sub>10</sub>H<sub>13</sub>O: 149.0961; found 149.0965.

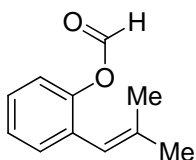

#### 2-(2-Methylprop-1-en-1-yl)phenyl formate (**5j**)

**5j** was obtained from **S10** by formylation analogous to synthesis of **5b** as a colorless oil. Yield: 100%.

<sup>1</sup>H NMR (400 MHz, CDCl<sub>3</sub>) δ 8.22 (s, 1H), 7.30-7.21 (m, 3H), 7.07 (dd, 1H, *J* = 7.2, 1.6 Hz), 6.10 (s, 1H), 1.89 (d, 1H, *J* = 1.2 Hz), 1.74 (d, 3H, *J* = 1.2 Hz); <sup>13</sup>C NMR (100 MHz, CDCl<sub>3</sub>) δ 159.4, 147.6, 138.4, 131.3, 131.0, 127.5, 126.1, 121.5, 119.0, 26.2 and 19.4; IR (ATR) 2913, 1738, 1483, 1445, 1188, 1171, 1111 and 760 cm<sup>-1</sup>; HRMS (ESI) [M+H]<sup>+</sup> calcd for C<sub>11</sub>H<sub>13</sub>O<sub>2</sub>: 177.0910; found 177.0914.

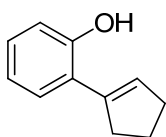

#### 2-(Cyclopent-1-en-1-yl)phenol (**S11**)

Compound **S11** was synthesized according to previous report.<sup>21</sup>

<sup>1</sup>H NMR (400 MHz, CDCl<sub>3</sub>) δ 7.16 (dd, 1H, *J* = 7.8, 1.4 Hz), 7.13 (ddd, 1H, *J* = 7.8, 6.8, 1.4 Hz), 6.90-6.86 (m, 2H), 6.10 (m, 1H), 5.57 (s, 1H), 2.75-2.69 (m, 2H), 2.62-2.56 (m, 2H), 2.04-1.97 (m, 2H).

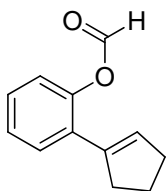

#### 2-(Cyclopent-1-en-1-yl)phenyl formate (**5k**)

**5k** was obtained from **S11** by formylation analogous to synthesis of **5b** as a colorless oil. Yield: 96%.

$^1\text{H}$  NMR (400 MHz,  $\text{CDCl}_3$ )  $\delta$  8.26 (s, 1H), 7.39-7.36 (m, 1H), 7.28-7.21 (m, 2H), 7.08-7.04 (m, 1H), 6.19-6.14 (m, 1H), 2.73-2.65 (m, 2H), 2.56-2.48 (m, 2H), 2.00-1.91 (m, 2H);  $^{13}\text{C}$  NMR (100 MHz,  $\text{CDCl}_3$ )  $\delta$  159.9, 147.3, 134.0, 131.8, 130.6, 129.3, 127.8, 126.7, 122.4, 35.4, 33.8 and 23.3; IR (ATR) 2949, 2843, 1759, 1738, 1487, 1445, 1175, 1115, 1090 and  $746\text{ cm}^{-1}$ ; HRMS (DART)  $[\text{M}+\text{H}]^+$  calcd for  $\text{C}_{12}\text{H}_{13}\text{O}_2$ : 189.0910; found 189.0917.

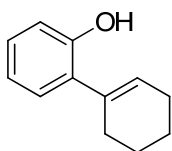

#### 2-(Cyclohex-1-en-1-yl)phenol (**S12**)

Compound **S12** was synthesized according to previous report.<sup>23</sup>

$^1\text{H}$  NMR (400 MHz,  $\text{CDCl}_3$ )  $\delta$  7.13 (ddd, 1H,  $J = 8.1, 7.8, 1.5\text{ Hz}$ ), 7.07 (dd, 1H,  $J = 7.8, 1.5\text{ Hz}$ ), 6.91 (dd, 1H,  $J = 8.3, 1.0\text{ Hz}$ ), 6.87 (ddd, 1H,  $J = 8.3, 8.1, 1.0\text{ Hz}$ ), 5.87 (m, 1H), 5.64 (s, 1H), 2.29-2.25 (m, 2H), 2.23-2.19 (m, 2H), 1.80-1.76 (m, 2H), 1.74-1.68 (m, 2H).

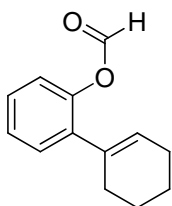

#### 2-(Cyclohex-1-en-1-yl)phenyl formate (**5l**)

**5l** was obtained from **S12** by formylation analogous to synthesis of **5b** as a colorless oil. Yield: 92%.

$^1\text{H}$  NMR (400 MHz,  $\text{CDCl}_3$ )  $\delta$  8.22 (s, 1H), 7.28-7.21 (m, 3H), 7.07-7.03 (m, 1H), 5.77-5.74 (m, 1H), 2.28-2.22 (m, 2H), 2.18-2.11 (m, 2H), 1.77-1.69 (m, 2H), 1.67-1.61 (m, 2H);  $^{13}\text{C}$  NMR (100 MHz,  $\text{CDCl}_3$ )  $\delta$  159.8, 147.1, 137.4, 134.7, 129.9, 128.6, 127.9, 126.7, 122.1, 29.2, 25.7, 23.0 and 22.0; IR (ATR) 2928, 1761, 1740, 1483, 1443, 1177, 1115, 1092 and  $750\text{ cm}^{-1}$ ; HRMS (DART)  $[\text{M}+\text{H}]^+$  calcd for  $\text{C}_{13}\text{H}_{15}\text{O}_2$ : 203.1067; found 203.1065.

#### 4. General experimental procedure

##### General experimental procedure of investigations for effect of additives (Table 1).

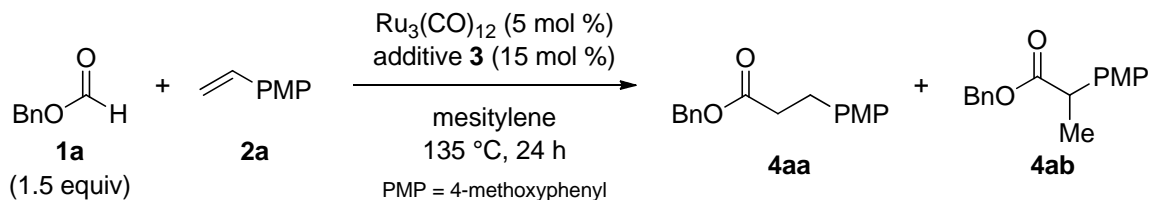

Benzyl formate (**1a**, 77.0  $\mu\text{L}$ , 0.600 mmol, 1.5 equiv), imidazole derivative as additive **3** (0.0600 mmol, 15 mol %),  $\text{Ru}_3(\text{CO})_{12}$  (12.8 mg, 0.0200 mmol, 5 mol %), and mesitylene (0.20 mL) were added to a 2-mL vial equipped with a silicon septum cap under flowing Ar. 4-Methoxystyrene (**2a**, 53.2  $\mu\text{L}$ , 0.400 mmol) was added to the vial and then sealed by a new silicon septum cap. The mixture was warmed to 135 °C (bath temperature) and stirred for 24 h. The reaction mixture was cooled to RT and was diluted with EtOAc, washed with  $\text{H}_2\text{O}$  three times, dried over  $\text{Na}_2\text{SO}_4$ , filtered, and concentrated. The obtained residue was purified by column chromatography on silica gel (hexane/EtOAc 5/1) to afford mixture of the desired product **4aa** and **4ab** as a colorless oil.

##### General experimental procedure of intermolecular hydroesterification (Tables 2 and 3).

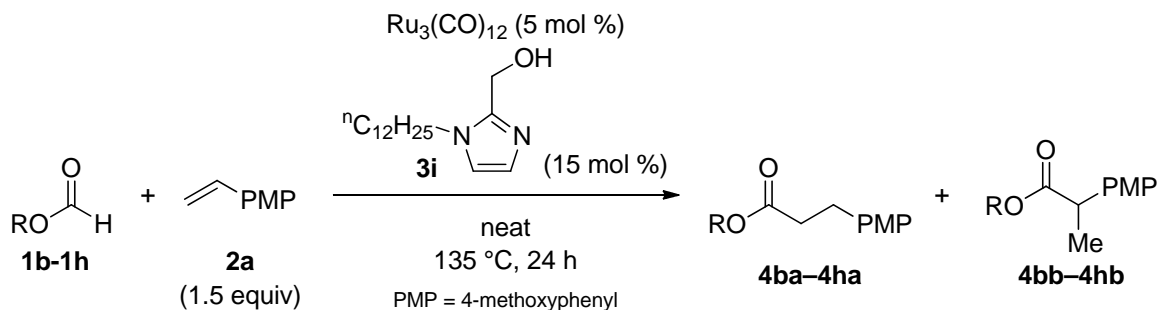

Formate (0.400 mmol), **3i** (16.0 mg, 0.0600 mmol, 15 mol %), and  $\text{Ru}_3(\text{CO})_{12}$  (12.8 mg, 0.0200 mmol, 5 mol %) were added to a 2-mL vial equipped with a silicon septum cap under flowing Ar. Alkene (0.600 mmol, 1.5 equiv) was added to the vial and then sealed by a new silicon septum cap. The mixture was warmed to 135 °C (bath temperature) and stirred for 24 h. The reaction mixture was cooled to RT and was diluted with EtOAc, washed with  $\text{H}_2\text{O}$  three times, dried over  $\text{Na}_2\text{SO}_4$ , filtered, and concentrated. The obtained residue was purified by column chromatography on silica gel (hexane/EtOAc 5/1) to afford mixture of the desired linear and branched product as colorless oil.

**Representative experimental procedure of intramolecular hydroesterification (Table 4, entry 2).**

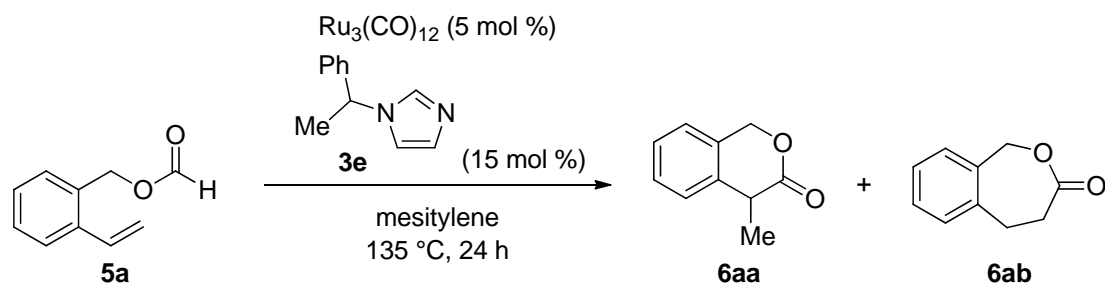

**5a** (100 mg, 0.620 mmol), **3e** (16.0 mg, 0.0930 mmol, 15 mol %), and mesitylene (0.30 mL) were added to a 2-mL vial equipped with a silicon septum cap under flowing Ar.  $\text{Ru}_3(\text{CO})_{12}$  (20.0 mg, 0.0310 mmol, 5 mol %) was added to the vial and then sealed by a new silicon septum cap. The mixture was warmed to 135 °C (bath temperature) and stirred for 24 h. The reaction mixture was cooled to RT and directly purified by PTLC on silica gel (hexanes/EtOAc 4/1) to afford *exo* product **6aa** (68 mg, 0.422 mmol, 68%) as a colorless oil and *endo* product **6ab** (8 mg, 0.050 mmol, 8%) as a colorless oil.

## 5. Analytical data of hydroesterification products

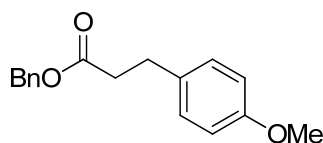

### Benzyl 3-(4-methoxyphenyl)propanoate (**4aa**)<sup>22</sup>

**4aa** was obtained from **1a** and **2a** as a colorless oil. Yield: 48%.

<sup>1</sup>H NMR (400 MHz, CDCl<sub>3</sub>) δ 7.33-7.27 (m, 5H), 7.10 (d, 2H, *J* = 8.3 Hz), 6.81 (d, 2H, *J* = 8.3 Hz), 5.10 (s, 2H), 3.78 (s, 3H), 2.91 (t, 2H, *J* = 7.6 Hz), 2.65 (t, 2H, *J* = 7.8 Hz); <sup>13</sup>C NMR (100 MHz, CDCl<sub>3</sub>) δ 172.8, 158.1, 136.0, 132.5, 129.2, 128.5, 128.2, 113.9, 66.2, 55.2, 36.2 and 30.1; IR (ATR) 2934, 1732, 1512, 1244, 1148, 1034, 826, 735, 696 and 519 cm<sup>-1</sup>; HRMS (DART) [M+H]<sup>+</sup> calcd for C<sub>17</sub>H<sub>19</sub>O<sub>3</sub>: 271.1329; found 271.1323.

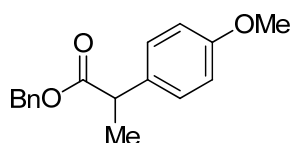

### Benzyl 2-(4-methoxyphenyl)propanoate (**4ab**)

**4ab** was obtained from **1a** and **2a** as a colorless oil. Yield: 41%.

<sup>1</sup>H NMR (400 MHz, CDCl<sub>3</sub>) δ 7.28-7.25 (m, 7H), 6.85 (d, 2H, *J* = 8.8 Hz), 5.12 (d, 1H, *J* = 12.7 Hz), 5.06 (d, 1H, *J* = 12.7 Hz), 3.78 (s, 3H), 3.73 (q, 1H, *J* = 7.1 Hz), 1.49 (d, 3H, *J* = 7.3 Hz); <sup>13</sup>C NMR (100 MHz, CDCl<sub>3</sub>) δ 174.6, 158.7, 136.0, 132.5, 128.5, 128.4, 128.0, 127.8, 113.9, 66.3, 55.2, 44.6 and 18.5; IR (ATR) 2934, 1732, 1510, 1244, 1153, 1034, 833, 737 and 696 cm<sup>-1</sup>; HRMS (DART) [M+H]<sup>+</sup> calcd for C<sub>17</sub>H<sub>19</sub>O<sub>3</sub>: 271.1329; found 271.1323.

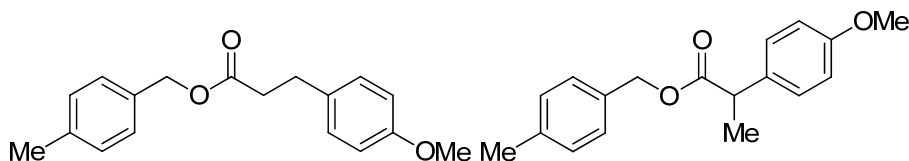

### 4-Methylbenzyl 3-(4-methoxyphenyl)propanoate (**4ba**) and 4-methylbenzyl 2-(4-methoxyphenyl)propanoate (**4bb**)

Mixture of **4ba** and **4bb** was obtained from **1b** and **2a** as a colorless oil. Yield: 83% (**4ba**:**4bb** = 53:47).

<sup>1</sup>H NMR (400 MHz, CDCl<sub>3</sub>) δ 7.22-7.18 (m, 2H), 7.15-7.12 (m, 2H), 7.08 (d, 2H, *J* = 11.0 Hz), 6.84 (d, 2H, *J* = 11.0 Hz), 6.79 (d, 2H, *J* = 11.0 Hz), 5.07 (d, 1H, *J* = 15.9 Hz, **4bb**), 5.05 (s, 2H, **4ba**), 5.00 (d, 1H, *J* = 15.9 Hz, **4bb**), 3.77 (s, 3H), 3.76 (s, 3H), 3.70 (q, 1H, *J* = 8.6 Hz, **4bb**), 2.89 (t, 2H, *J* = 9.8 Hz, **4ba**), 2.62 (t, 2H, *J* = 9.8 Hz, **4ba**), 2.34 (s, 3H), 2.32 (s, 3H), 1.47 (d, 3H, *J* = 8.6 Hz, **4bb**); <sup>13</sup>C NMR (100 MHz, CDCl<sub>3</sub>) δ 174.5, 172.7, 158.6, 158.0, 137.9, 137.8, 133.0, 132.9, 132.5, 132.4, 129.2, 129.13, 129.06, 128.5, 128.3, 128.0, 113.9, 113.8, 66.3, 66.1, 55.2, 55.1, 44.6, 36.1, 30.0, 21.11, 21.10 and 18.5; IR (ATR) 1730, 1512, 1244, 1151, 1033 and 806 cm<sup>-1</sup>; HRMS (DART) [M+H]<sup>+</sup> calcd for C<sub>18</sub>H<sub>20</sub>O<sub>3</sub>: 285.1485; found 285.1483.



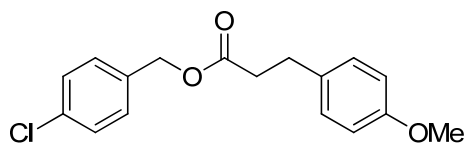

#### 4-Chlorobenzyl 3-(4-methoxyphenyl)propanoate (**4ca**)

**4ca** was obtained from **1c** and **2a** as a colorless oil. Yield: 31%.

$^1\text{H}$  NMR (400 MHz,  $\text{CDCl}_3$ )  $\delta$  7.30 (d, 2H,  $J = 11.0$  Hz), 7.21 (d, 2H,  $J = 11.0$  Hz), 7.08 (d, 2H,  $J = 11.0$  Hz), 6.80 (d, 2H,  $J = 11.0$  Hz), 5.05 (s, 2H), 3.78 (s, 3H), 2.90 (t, 2H,  $J = 9.8$  Hz), 2.64 (t, 2H,  $J = 9.8$  Hz);  $^{13}\text{C}$  NMR (100 MHz,  $\text{CDCl}_3$ )  $\delta$  172.6, 158.1, 134.4, 132.3, 129.5, 129.2, 128.7, 113.8, 65.3, 55.2, 36.1 and 30.0 (one aromatic carbon signal is missing); IR (ATR) 1732, 1512, 1244, 1149, 1033 and 825  $\text{cm}^{-1}$ ; HRMS (DART)  $[\text{M}+\text{H}]^+$  calcd for  $\text{C}_{17}\text{H}_{17}\text{ClO}_3$ : 305.0939; found 305.0934.

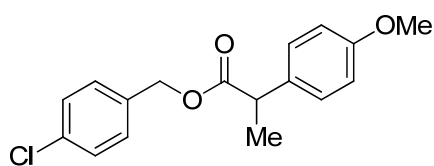

#### 4-Chlorobenzyl 2-(4-methoxyphenyl)propanoate (**4cb**)

**4cb** was obtained from **1c** and **2a** as a colorless oil. Yield: 30%.

$^1\text{H}$  NMR (400 MHz,  $\text{CDCl}_3$ )  $\delta$  7.27 (d, 2H,  $J = 11.0$  Hz), 7.20 (d, 2H,  $J = 11.0$  Hz), 7.15 (d, 2H,  $J = 11.0$  Hz), 6.85 (d, 2H,  $J = 11.0$  Hz), 5.04 (s, 2H), 3.79 (s, 3H), 3.71 (q, 1H,  $J = 9.2$  Hz), 1.48 (d, 3H,  $J = 9.2$  Hz);  $^{13}\text{C}$  NMR (100 MHz,  $\text{CDCl}_3$ )  $\delta$  174.4, 158.7, 134.5, 133.9, 132.3, 129.2, 128.6, 128.5, 114.0, 65.5, 55.2, 44.6 and 18.4; IR (ATR) 11732, 1510, 1246, 1155, 1085 and 804  $\text{cm}^{-1}$ ; HRMS (DART)  $[\text{M}+\text{H}]^+$  calcd for  $\text{C}_{17}\text{H}_{17}\text{ClO}_3$ : 305.0939; found 305.0931.

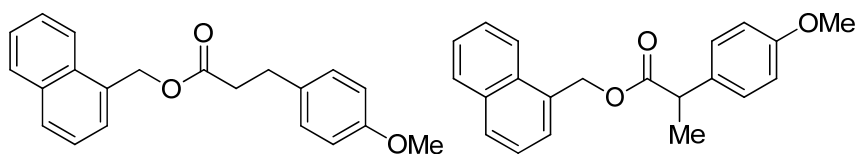

#### Naphthalen-1-ylmethyl 3-(4-methoxyphenyl)propanoate (**4da**) and naphthalen-1-ylmethyl 2-(4-methoxyphenyl)propanoate (**4db**)

Mixture of **4da** and **4db** was obtained from **1d** and **2a** as a colorless oil. Yield: 79% (**4da**:**4db** = 44:56).

$^1\text{H}$  NMR (400 MHz,  $\text{CDCl}_3$ )  $\delta$  7.91-7.79 (m, 2H), 7.51-7.37 (m, 4H), 7.21 (d, 2H,  $J = 11.0$  Hz, **4db**), 7.06 (d, 2H,  $J = 11.0$  Hz, **4da**), 6.80 (d, 2H,  $J = 11.0$  Hz, **4da**), 6.77 (d, 2H,  $J = 11.0$  Hz, **4db**), 5.55 (s, 2H, **4da**), 5.54 (d, 1H,  $J = 15.9$  Hz, **4db**), 5.50 (d, 1H,  $J = 15.9$  Hz, **4db**), 3.77 (s, 3H), 3.75 (s, 3H), 3.71 (q, 1H,  $J = 9.2$  Hz, **4db**), 2.90 (t, 2H,  $J = 9.8$  Hz, **4da**), 2.62 (t, 2H,  $J = 9.8$  Hz, **4da**), 1.48 (d, 3H,  $J = 9.2$  Hz, **4db**);  $^{13}\text{C}$  NMR (100 MHz,  $\text{CDCl}_3$ )  $\delta$  174.5, 172.8, 158.6, 158.0, 133.61, 133.56, 132.31, 132.29, 131.5, 131.44, 131.36, 131.3, 129.2, 129.14, 129.06, 128.6, 128.50, 128.47, 127.4, 127.1, 126.4, 126.3, 125.84, 125.76, 125.2, 125.1, 123.53, 123.47, 113.9, 113.8, 64.9, 64.4, 55.12, 55.08, 44.6, 36.1, 30.0 and 18.5; IR (ATR) 1728, 1510, 1244, 1151, 1033 and 790  $\text{cm}^{-1}$ ; HRMS (DART)  $[\text{M}+\text{H}]^+$  calcd for  $\text{C}_{21}\text{H}_{20}\text{O}_3$ : 321.1485; found 321.1493.

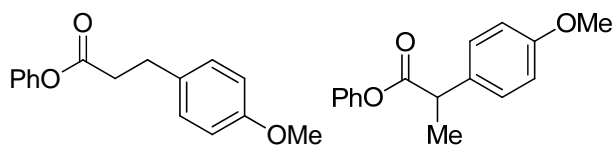

**Phenyl 3-(4-methoxyphenyl)propanoate (4ea) and phenyl 2-(4-methoxyphenyl)propanoate (4eb)**

Mixture of **4ea** and **4eb** was obtained from **1e** and **2a** as a colorless oil. Yield: 43% (**4ea**:**4eb** = 68:32).

$^1\text{H}$  NMR (400 MHz,  $\text{CDCl}_3$ )  $\delta$  7.37-7.30 (m, 2H), 7.24-7.16 (m, 3H), 7.01-6.98 (m, 2H), 6.91-6.84 (m, 2H), 3.91 (q, 1H,  $J = 7.2$  Hz, **4eb**), 3.77 (s, 3H), 3.01 (t, 2H,  $J = 7.6$  Hz, **4ea**), 2.84 (t, 2H,  $J = 16.1$  Hz, **4ea**), 1.58 (d, 3H,  $J = 5.9$  Hz, **4eb**);  $^{13}\text{C}$  NMR (100 MHz,  $\text{CDCl}_3$ )  $\delta$  173.4, 171.6, 158.9, 158.3, 150.9, 150.7, 132.3, 132.2, 129.5, 129.4, 128.7, 125.9, 125.8, 121.7, 121.5, 114.3, 114.1, 114.0, 55.4, 44.9, 36.4, 30.2 and 18.7; IR (ATR) 2934, 1753, 1611, 1512, 1246, 1194, 1128, 1032, 827 and  $689\text{ cm}^{-1}$ ; HRMS (DART)  $[\text{M}+\text{H}]^+$  calcd for  $\text{C}_{16}\text{H}_{17}\text{O}_3$ : 257.1172; found 257.1180.

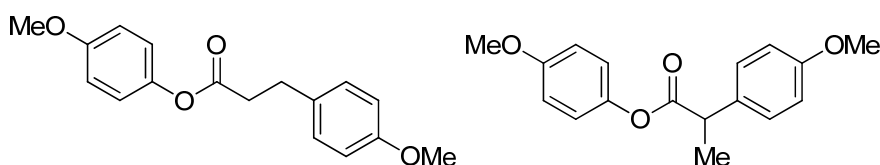

**4-Methoxyphenyl 3-(4-methoxyphenyl)propanoate (4fa) and 4-methoxyphenyl 2-(4-methoxyphenyl)propanoate (4fb)**

Mixture of **4fa** and **4fb** was obtained from **1f** and **2a** as a colorless oil. Yield: 57% (**4fa**:**4fb** = 48:52).

$^1\text{H}$  NMR (400 MHz,  $\text{CDCl}_3$ )  $\delta$  7.30 (d, 2H,  $J = 11.0$  Hz, **4fb**), 7.17 (d, 2H,  $J = 11.0$  Hz, **4fa**), 6.93-6.81 (m, 6H), 3.88 (q, 1H,  $J = 9.2$  Hz, **4fb**), 3.79 (s, 3H), 3.78 (s, 3H), 3.77 (s, 3H), 3.75 (s, 3H), 3.00 (t, 2H,  $J = 9.8$  Hz, **4fa**), 2.81 (t, 2H,  $J = 9.8$  Hz, **4fa**), 1.57 (d, 3H,  $J = 9.2$  Hz, **4fb**);  $^{13}\text{C}$  NMR (100 MHz,  $\text{CDCl}_3$ )  $\delta$  173.6, 171.8, 158.8, 158.1, 157.2, 157.1, 144.3, 144.1, 132.18, 132.16, 129.3, 128.5, 122.2, 122.1, 114.4, 114.3, 114.1, 113.9, 55.5, 55.2, 44.7, 36.2, 30.1 and 18.5; IR (ATR) 1749, 1504, 1238, 1184, 1099, 1029 and  $813\text{ cm}^{-1}$ ; HRMS (DART)  $[\text{M}+\text{H}]^+$  calcd for  $\text{C}_{17}\text{H}_{18}\text{O}_4$ : 287.1278; found 287.1283.

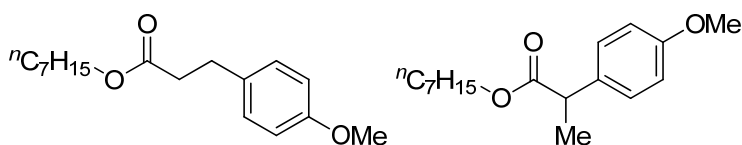

**Heptyl 3-(4-methoxyphenyl)propanoate (4ga) and heptyl 2-(4-methoxyphenyl)propanoate (4gb)**

Mixture of **4ga** and **4gb** was obtained from **1g** and **2a** as a yellow oil. Yield: 76% (**4ga**:**4gb** = 61:39).

$^1\text{H}$  NMR (400 MHz,  $\text{CDCl}_3$ )  $\delta$  7.23 (1H, d), 7.11 (d, 1H,  $J = 8.8$  Hz), 6.83 (dd, 2H,  $J = 10.7, 8.8$  Hz), 4.04 (td, 2H,  $J = 6.8, 3.9$  Hz), 3.77 (d, 3H,  $J = 2.9$  Hz), 3.74 (s, 3H), 3.65 (q, 1H,  $J = 7.2$  Hz, **4gb**), 2.88 (t, 2H,  $J = 7.8$  Hz, **4ga**), 2.58 (t, 2H,  $J = 7.8$  Hz, **4ga**), 1.57 (m, 2H), 1.47 (d, 3H,  $J = 7.3$  Hz, **4gb**), 1.26 (m, 8H), 0.87 (q, 3H,  $J = 6.7$  Hz);  $^{13}\text{C}$  NMR (100 MHz,  $\text{CDCl}_3$ )  $\delta$  174.8, 173.0, 158.5, 158.0, 132.7, 132.5, 129.1, 128.4, 113.8, 64.7, 64.5, 55.1, 44.6, 36.1, 31.6, 30.1, 28.8, 28.5, 25.8, 25.7, 22.5, 18.4 and 14.0; IR (ATR) 2928, 1732, 1612, 1512, 1458, 1246, 1204, 1167, 1036 and  $827\text{ cm}^{-1}$ ; HRMS (DART)  $[\text{M}+\text{H}]^+$  calcd for  $\text{C}_{17}\text{H}_{27}\text{O}_3$ : 279.1955; found 279.1953.

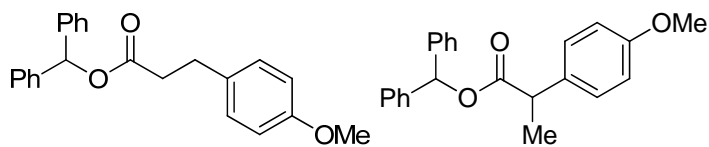

**Benzhydryl 3-(4-methoxyphenyl)propanoate (4ha) and benzhydryl 2-(4-methoxyphenyl)propanoate (4hb)**

Mixture of **4ha** and **4hb** was obtained from **1h** and **2a** as a colorless oil. Yield: 73% (**4ha:4hb** = 83:17).

$^1\text{H}$  NMR (400 MHz,  $\text{CDCl}_3$ )  $\delta$  7.79 (d, 2H,  $J = 7.3$  Hz), 7.55 (t, 1H,  $J = 8.3$  Hz), 7.45 (t, 2H,  $J = 7.6$  Hz), 7.34-7.19 (m, 5H), 7.10-7.04 (m, 2H), 6.88-6.77 (m, 3H), 3.80-3.72 (m, 1H, **4hb**), 3.75 (s, 3H, **4ha**), 3.74 (s, 3H, **4hb**), 2.91 (t, 2H,  $J = 7.6$  Hz, **4ha**), 2.70 (t, 2H,  $J = 7.6$  Hz, **4ha**), 1.49 (d, 3H,  $J = 7.3$  Hz, **4hb**);  $^{13}\text{C}$  NMR (100 MHz,  $\text{CDCl}_3$ )  $\delta$  196.6, 171.9, 158.0, 140.1, 137.5, 132.3, 123.0, 129.2, 128.6, 128.5, 128.4, 128.3, 128.2, 128.1, 127.8, 127.5, 127.2, 127.1, 127.0, 126.6, 113.9, 113.8, 55.2, 55.1, 44.8, 36.3, 30.0 and 18.2; IR (ATR) 1734, 1659, 1512, 1246, 1150, 1032, 829, 745, 700 and 638  $\text{cm}^{-1}$ ; HRMS (DART)  $[\text{M}+\text{H}]^+$  calcd for  $\text{C}_{23}\text{H}_{23}\text{O}_3$ : 347.1642; found 347.1633.

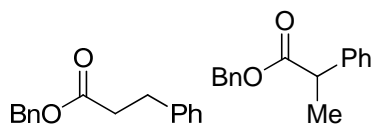

**Benzyl 3-phenylpropanoate (4ia)<sup>23</sup> and benzyl 2-phenylpropanoate (4ib)<sup>24</sup>**

Mixture of **4ia** and **4ib** was obtained from **1a** and **2b** as a colorless oil. Yield: >99% (**4ia:4ib** = 55:45).

$^1\text{H}$  NMR ( $\text{CDCl}_3$ )  $\delta$  7.35-7.17 (m, 10H), 5.13 (d, 1H,  $J = 12.7$  Hz), 5.11 (s, 2H), 5.07 (d, 1H,  $J = 12.2$  Hz), 3.78 (q, 1H,  $J = 7.2$  Hz, **4ib**), 2.97 (t, 2H,  $J = 7.8$  Hz, **4ia**), 2.69 (t, 2H,  $J = 7.8$  Hz, **4ia**), 1.52 (d, 3H,  $J = 7.2$  Hz, **4ib**);  $^{13}\text{C}$  NMR (100 MHz,  $\text{CDCl}_3$ )  $\delta$  174.2, 172.6, 140.4, 136.0, 135.9, 128.6, 128.5, 128.4, 128.2, 128.1, 128.0, 127.8, 127.5, 127.1, 126.2, 66.3, 66.2, 45.5, 35.8, 30.9 and 18.4; IR (ATR) 3030, 1732, 1497, 1454, 1200, 1152, 1030, 733 and 694  $\text{cm}^{-1}$ ; HRMS (DART)  $[\text{M}+\text{H}]^+$  calcd for  $\text{C}_{17}\text{H}_{19}\text{O}_2$ : 241.1223; found 241.1214.

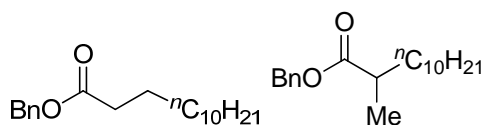

**Benzyl tridecanoate (4ja) and benzyl 2-methyltridecanoate (4jb)**

Mixture of **4ja** and **4jb** was obtained from **1a** and **2c** as a gray oil. Yield: 75% (**4ja:4jb** = 76:24).

$^1\text{H}$  NMR (400 MHz,  $\text{CDCl}_3$ )  $\delta$  7.31-7.28 (m, 5H), 5.10 (s, 2H), 2.48 (q, 1H,  $J = 7.0$  Hz, **4jb**), 2.35 (t, 2H,  $J = 7.6$  Hz, **4ja**), 1.63 (m, 2H), 1.25-1.28 (m, 18H), 1.16 (d, 3H,  $J = 6.8$  Hz, **4jb**), 0.86 (t, 3H,  $J = 8.3$  Hz);  $^{13}\text{C}$  NMR (100 MHz,  $\text{CDCl}_3$ )  $\delta$  176.8, 176.5, 176.4, 173.8, 136.4, 136.3, 128.6, 128.3, 66.1, 66.0, 65.9, 47.5, 45.8, 45.6, 39.7, 34.4, 33.9, 32.0, 29.8, 29.7, 29.6, 29.5, 29.4, 29.3, 27.3, 25.1, 22.8, 17.2 and 14.3; IR (ATR) 2922, 2853, 1736, 1456, 1213, 1155, 1115, 748, 733 and 696  $\text{cm}^{-1}$ ; HRMS (DART)  $[\text{M}+\text{H}]^+$  calcd for  $\text{C}_{20}\text{H}_{33}\text{O}_2$ : 305.2475; found 305.2476.

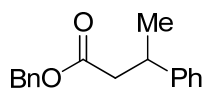

**Benzyl 3-phenylbutanoate (4k)<sup>25</sup>**

**4k** was obtained from **1a** and **2d** as a colorless oil. Yield: 50%.

$^1\text{H}$  NMR (400MHz,  $\text{CDCl}_3$ )  $\delta$  7.33-7.18 (m, 10H), 5.05 (s, 2H), 3.30 (q, 1H,  $J$  = 7.3 Hz), 2.64 (dq, 2H,  $J$  = 7.6, 7.5 Hz), 1.30 (d, 3H,  $J$  = 6.8 Hz);  $^{13}\text{C}$  NMR (100 MHz,  $\text{CDCl}_3$ )  $\delta$  172.1, 145.5, 135.9, 128.5, 128.4, 128.1, 126.7, 126.4, 66.1, 42.9, 36.5 and 21.8; IR (ATR) 2963, 1730, 1495, 1454, 1265, 1152, 1020, 976, 750 and 696  $\text{cm}^{-1}$ ; HRMS (DART)  $[\text{M}+\text{H}]^+$  calcd for  $\text{C}_{17}\text{H}_{19}\text{O}_2$ : 255.1380; found 255.1385.

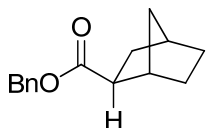

**(1S,2S,4R)-Benzyl bicyclo[2.2.1]heptane-2-carboxylate (4l)**<sup>26</sup>

**4l** was obtained from **1a** and **1e** as a colorless oil. Yield: 83%.

$^1\text{H}$  NMR (400MHz,  $\text{CDCl}_3$ )  $\delta$  7.37-7.33 (m, 5H), 5.10 (s, 2H), 2.52 (br s, 1H), 2.37 (q, 1H,  $J$  = 4.6 Hz), 2.30 (br s, 1H), 1.89-1.83 (m, 1H), 1.54-1.49 (m, 4H), 1.23-1.19 (m, 3H);  $^{13}\text{C}$  NMR (100 MHz,  $\text{CDCl}_3$ )  $\delta$  175.8, 136.4, 128.5, 128.0, 66.0, 46.5, 40.9, 36.5, 36.0, 34.1, 29.4 and 28.6; IR (ATR) 2953, 1728, 1310, 1213, 1155, 1065, 1024, 735 and 696  $\text{cm}^{-1}$ ; HRMS (DART)  $[\text{M}+\text{H}]^+$  calcd for  $\text{C}_{15}\text{H}_{19}\text{O}_2$ : 232.1380; found 232.1380.

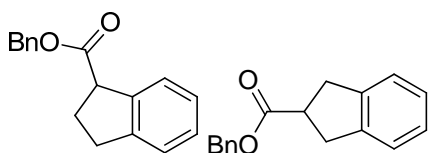

**Benzyl 2,3-dihydro-1H-indene-1-carboxylate (4ma) and benzyl 2,3-dihydro-1H-indene-2-carboxylate (4mb)**

Mixture of **4ma** and **4mb** was obtained from **1a** and **2f** as a colorless oil. Yield: 88% (**4ma**:**4mb** = 76:24).

$^1\text{H}$  NMR (400 MHz,  $\text{CDCl}_3$ )  $\delta$  7.40-7.34 (m, 4H), 7.21-7.16 (m, 5H), 5.16 (s, 2H), 4.09 (t, 1H,  $J$  = 7.3 Hz, **4ma**), 3.40-3.31 (m, 1H, **4mb**), 3.29-3.18 (m, 4H, **4mb**), 3.14-3.06 (m, 1H, **4ma**), 2.94-2.87 (m, 1H, **4ma**), 2.51-2.42 (m, 1H, **4ma**), 2.37-2.28 (m, 1H, **4ma**);  $^{13}\text{C}$  NMR (100 MHz,  $\text{CDCl}_3$ )  $\delta$  175.2, 173.9, 144.3, 141.7, 140.7, 136.2, 128.7, 128.3, 128.2, 127.7, 126.8, 126.6, 125.0, 124.8, 124.5, 66.7, 66.6, 50.3, 43.8, 36.3, 31.9 and 28.8; IR (ATR) 2947, 1730, 1603, 1456, 1258, 1153, 1016, 970, 745 and 696  $\text{cm}^{-1}$ ; HRMS (DART)  $[\text{M}+\text{H}]^+$  calcd for  $\text{C}_{17}\text{H}_{17}\text{O}_2$ : 253.1223; found 253.1231.

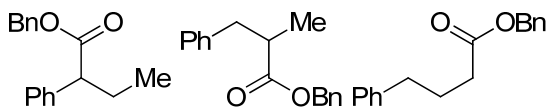

**Benzyl 2-phenylbutanoate (4na),<sup>27</sup> benzyl 2-methyl-3-phenylpropanoate (4nb),<sup>24</sup> and benzyl 4-phenylbutanoate (4nc)<sup>29</sup>**

Mixture of **4na**, **4nb** and **4nc** was obtained from **1a** and **2g** as a colorless oil. Yield: 69% (**4na**:**4nb**:**4nc** = 51:20:29).

$^1\text{H}$  NMR (400MHz,  $\text{CDCl}_3$ )  $\delta$  7.56-7.13 (m, 10H), 5.14 (d, 1H,  $J$  = 12.7 Hz), 5.11 (s, 2H), 5.07 (s, 2H), 5.06 (d, 1H,  $J$  = 12.7 Hz), 3.51 (t, 1H,  $J$  = 7.8 Hz, **4na**), 3.04 (q, 1H,  $J$  = 6.7 Hz, **4nb**), 2.80 (q, 1H,  $J$  = 7.0 Hz, **4nb**), 2.70 (t, 1H,  $J$  = 6.6 Hz, **4nb**), 2.64 (t, 2H,  $J$  = 7.8 Hz, **4nc**), 2.38 (t, 2H,  $J$  = 7.6 Hz, **4nc**), 2.18-2.07 (m, 1H, **4na**), 2.01-1.94 (m, 2H, **4nc**), 1.87-1.77 (m, 1H, **4na**), 1.18 (d, 3H,  $J$  = 6.8 Hz, **4nb**), 0.88 (t, 3H,  $J$  = 7.3 Hz, **4na**);  $^{13}\text{C}$  NMR (100 MHz,  $\text{CDCl}_3$ )  $\delta$  175.9, 173.3, 141.3, 139.2, 136.1, 129.0, 128.5, 128.4, 128.3, 128.2, 128.1, 128.0, 127.9, 126.3, 126.0, 66.3, 66.1, 41.5, 39.7, 35.1, 33.6, 26.6, 26.5 and

16.8; IR (ATR) 3028, 1732, 1497, 1454, 1153, 1028, 743, 696 and 509  $\text{cm}^{-1}$ ; HRMS (DART)  $[\text{M}+\text{H}]^+$  calcd for  $\text{C}_{17}\text{H}_{19}\text{O}_2$ : 255.1380; found 255.1389.

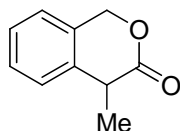

**4-Methylisochroman-3-one (6aa)**<sup>28</sup>

**6aa** was obtained from **5a** as a colorless oil. Yield: 67%.

$^1\text{H}$  NMR (400 MHz,  $\text{CDCl}_3$ )  $\delta$  7.41-7.24 (m, 4H), 5.34 (d, 1H,  $J = 13.6$  Hz), 5.28 (d, 1H,  $J = 13.6$  Hz), 3.64 (q, 1H,  $J = 6.8$  Hz), 1.64 (d, 3H,  $J = 6.8$  Hz);  $^{13}\text{C}$  NMR (100 MHz,  $\text{CDCl}_3$ )  $\delta$  173.4, 135.4, 131.8, 128.7, 126.9, 124.5, 124.4, 69.0, 39.2, and 12.7; IR (ATR) 1736, 1462, 1381, 1240, 1150, 1123, 1043, 1022, 793, 752, and 733  $\text{cm}^{-1}$ ; HRMS (DART)  $[\text{M}+\text{H}]^+$  calcd for  $\text{C}_{10}\text{H}_{11}\text{O}_2$ : 163.0754; found 163.0763.

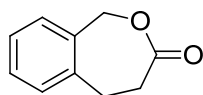

**4,5-Dihydrobenzo[c]oxepin-3(1H)-one (6ab)**<sup>29</sup>

**6ab** was obtained from **5a** as a colorless oil. Yield: 8%.

$^1\text{H}$  NMR (400 MHz,  $\text{CDCl}_3$ )  $\delta$  7.35-7.25 (m, 1H), 7.23-7.15 (m, 3H), 5.28 (s, 2H), 3.28-3.24 (m, 2H), 3.11-3.07 (m, 2H);  $^{13}\text{C}$  NMR (100 MHz,  $\text{CDCl}_3$ )  $\delta$  174.0, 137.0, 133.1, 129.9, 129.20, 129.17, 126.6, 70.2, 31.5, and 28.3; IR (ATR) 1726, 1452, 1381, 1236, 1152, 1016, and 754  $\text{cm}^{-1}$ ; HRMS (DART)  $[\text{M}+\text{H}]^+$  calcd for  $\text{C}_{10}\text{H}_{11}\text{O}_2$ : 163.0754; found 163.0749.

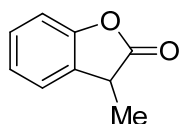

**3-Methylbenzofuran-2(3H)-one (6ba)**<sup>30</sup>

**6ba** was obtained from **5b** as a colorless oil. Yield: 71%.

$^1\text{H}$  NMR (400 MHz,  $\text{CDCl}_3$ )  $\delta$  7.30-7.24 (m, 2H), 7.15 (t, 1H,  $J = 7.5$  Hz), 7.09 (d, 1H,  $J = 8.0$  Hz), 3.72 (q, 1H,  $J = 7.6$  Hz), 1.56 (d, 3H,  $J = 7.6$  Hz);  $^{13}\text{C}$  NMR (100 MHz,  $\text{CDCl}_3$ )  $\delta$  177.8, 153.4, 128.72, 128.66, 124.1, 123.8, 110.6, 38.2, and 15.7; IR (ATR) 1800, 1618, 1477, 1464, 1292, 1231, 1202, 1125, 1086, 1030, 989, 878, 748, and 727  $\text{cm}^{-1}$ ; HRMS (DART)  $[\text{M}+\text{H}]^+$  calcd for  $\text{C}_9\text{H}_9\text{O}_2$ : 149.0597; found 149.0597.

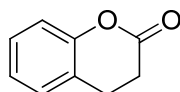

**Chroman-2-one (6bb)**<sup>31</sup>

**6bb** was obtained from **5b** as a colorless oil. Yield: 11%.

$^1\text{H}$  NMR (400 MHz,  $\text{CDCl}_3$ )  $\delta$  7.26-7.10 (m, 2H), 7.10-6.95 (m, 2H), 3.01-2.89 (m, 2H), 2.78-2.69 (m, 2H);  $^{13}\text{C}$  NMR (100 MHz,  $\text{CDCl}_3$ )  $\delta$  168.6, 152.0, 128.3, 128.0, 124.4, 122.6, 117.0, 29.3, and 23.7; IR (ATR) 1768, 1751, 1489, 1458, 1244, 1225, 1138, 1107, 1024, 897, and 754  $\text{cm}^{-1}$ ; HRMS (DART)  $[\text{M}+\text{H}]^+$  calcd for  $\text{C}_9\text{H}_9\text{O}_2$ : 149.0597; found 149.0589.

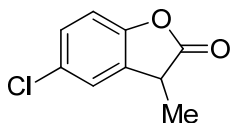

**5-Chloro-3-methylbenzofuran-2(3H)-one (6ca)**

**6ca** was obtained from **5c** as a colorless oil. Yield: 67%.

$^1\text{H}$  NMR (400 MHz,  $\text{CDCl}_3$ )  $\delta$  7.29-7.24 (m, 2H), 7.03 (d, 1H,  $J = 8.4$  Hz), 3.74 (q, 1H,  $J = 7.6$  Hz), 1.57 (d, 3H,  $J = 7.6$  Hz);  $^{13}\text{C}$  NMR (100 MHz,  $\text{CDCl}_3$ )  $\delta$  177.1, 151.8, 130.4, 129.4, 128.8, 128.4, 124.2, 111.8, 38.5 and 15.7; IR (ATR) 1803, 1471, 1231, 1132, 1094, 1026, 849 and  $812\text{ cm}^{-1}$ ; HRMS (DART)  $[\text{M}+\text{H}]^+$  calcd for  $\text{C}_9\text{H}_8\text{ClO}_2$ : 183.0207; found 183.0214.

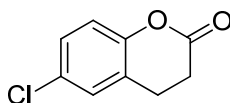

**6-Chlorochroman-2-one (6cb)**<sup>33</sup>

**6cb** was obtained from **5d** as a white solid (m.p.  $107\text{ }^\circ\text{C}$ ). Yield: 13%.

$^1\text{H}$  NMR (400 MHz,  $\text{CDCl}_3$ )  $\delta$  7.25-7.17 (m, 2H), 6.99 (d, 1H,  $J = 8.5$  Hz), 3.05-2.94 (m, 2H), 2.84-2.74 (m, 2H);  $^{13}\text{C}$  NMR (100 MHz,  $\text{CDCl}_3$ )  $\delta$  167.7, 150.5, 129.4, 128.3, 127.9, 124.2, 118.3, 28.8, and 23.6; IR (ATR) 1734, 1479, 1414, 1341, 1280, 1225, 1179, 1163, 1153, 1115, 1082, 899, and  $818\text{ cm}^{-1}$ ; HRMS (DART)  $[\text{M}+\text{H}]^+$  calcd for  $\text{C}_9\text{H}_8\text{ClO}_2$ : 183.0207; found 183.0211.

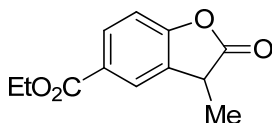

**Ethyl 3-methyl-2-oxo-2,3-dihydrobenzofuran-5-carboxylate (6da)**

**6da** was obtained from **5d** as a white solid (m.p.  $97\text{ }^\circ\text{C}$ ). Yield: 59%.

$^1\text{H}$  NMR (400 MHz,  $\text{CDCl}_3$ )  $\delta$  8.05 (ddd, 1H,  $J = 8.0, 1.2, 0.8$  Hz), 7.97 (dd, 1H,  $J = 1.2, 0.8$  Hz), 7.15 (d, 1H,  $J = 8.0$  Hz), 4.38 (qdd, 2H,  $J = 7.6, 0.8, 0.8$  Hz), 3.78 (q, 1H,  $J = 7.2$  Hz), 1.62 (d, 3H,  $J = 7.2$  Hz), 1.41 (t, 3H,  $J = 7.6$  Hz);  $^{13}\text{C}$  NMR (100 MHz,  $\text{CDCl}_3$ )  $\delta$  177.2, 165.8, 156.8, 131.2, 128.9, 126.7, 125.5, 110.5, 61.2, 38.1, 15.7, 14.3; IR (ATR) 1802, 1709, 1620, 1242, 1022, 993 and  $768\text{ cm}^{-1}$ ; HRMS (DART)  $[\text{M}+\text{H}]^+$  calcd for  $\text{C}_{12}\text{H}_{13}\text{O}_4$ : 221.0808; found 221.0808.

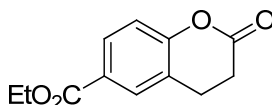

**Ethyl 2-oxochroman-6-carboxylate (6db)**

**6db** was obtained from **5d** as a colorless oil. Yield: 14%.

$^1\text{H}$  NMR (400 MHz,  $\text{CDCl}_3$ )  $\delta$  7.96 (dd, 1H,  $J = 8.4, 1.2$  Hz), 7.93 (d, 1H,  $J = 1.2$  Hz), 7.09 (d, 1H,  $J = 8.4$  Hz), 4.38 (q, 2H,  $J = 7.6$  Hz), 3.07 (t, 2H,  $J = 8.0$  Hz), 2.82 (t, 2H,  $J = 8.0$  Hz), 1.40 (t, 3H,  $J = 7.6$  Hz);  $^{13}\text{C}$  NMR (100 MHz,  $\text{CDCl}_3$ )  $\delta$  167.6, 165.7, 155.2, 130.0, 129.7, 126.7, 122.5, 117.0, 61.1, 28.9, 23.6 and 14.3; IR (ATR) 1775, 1709, 1285, 1265, 1115, 1098, 1026, 897 and  $770\text{ cm}^{-1}$ ; HRMS (DART)  $[\text{M}+\text{H}]^+$  calcd for  $\text{C}_{12}\text{H}_{13}\text{O}_4$ : 221.0808; found 221.0810.

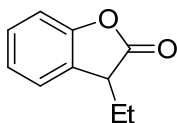

### 3-Ethylbenzofuran-2(3H)-one (**6ea**)<sup>32</sup>

**6ea** was obtained from **5e** or **5f** as a colorless oil. Yield: 90% from **5e**, 82% from **5f**.

<sup>1</sup>H NMR (400 MHz, CDCl<sub>3</sub>) δ 7.33-7.26 (m, 2H), 7.17-7.13 (m, 1H), 7.10 (d, 1H, *J* = 8.0 Hz), 3.70 (t, 1H, *J* = 5.6 Hz), 2.11-2.01 (m, 2H), 0.97 (t, 3H, *J* = 7.6 Hz); <sup>13</sup>C NMR (100 MHz, CDCl<sub>3</sub>) δ 177.0, 153.8, 128.6, 127.1, 124.1, 123.9, 110.5, 44.4, 24.2, and 10.0; IR (ATR) 1800, 1618, 1477, 1462, 1229, 1126, 1047, 908, 878, and 750 cm<sup>-1</sup>; HRMS (DART) [M+H]<sup>+</sup> calcd for C<sub>10</sub>H<sub>11</sub>O<sub>2</sub>: 163.0754; found 163.0756.

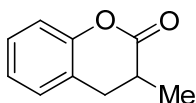

### 3-Methylchroman-2-one (**6eb**)<sup>33</sup>

**6eb** was obtained from **5d** or **5f** as a white solid (m.p. 61 °C). Yield: 10% from **5e**, 13% from **5f**.

<sup>1</sup>H NMR (400 MHz, CDCl<sub>3</sub>) δ 7.28-7.12 (m, 2H), 7.10-6.98 (m, 2H), 3.06-2.85 (m, 1H), 2.83-2.61 (m, 2H), 1.37 (d, 3H, *J* = 6.5 Hz); <sup>13</sup>C NMR (100 MHz, CDCl<sub>3</sub>) δ 171.5, 151.8, 128.1, 127.9, 124.2, 122.8, 116.5, 34.2, 31.6, and 15.3; IR (ATR) 1746, 1489, 1458, 1358, 1225, 1150, 1113, 937, and 756 cm<sup>-1</sup>; HRMS (DART) [M+H]<sup>+</sup> calcd for C<sub>10</sub>H<sub>11</sub>O<sub>2</sub>: 163.0754; found 163.0751.

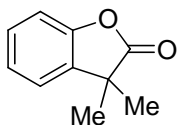

### 3,3-Dimethylbenzofuran-2(3H)-one (**6ga**)<sup>34</sup>

Following the general procedure except for using **3f** in place of **3e**, **6ga** was obtained from **5g** as a colorless oil. Yield: 28%.

<sup>1</sup>H NMR (400 MHz, CDCl<sub>3</sub>) δ 7.28 (ddd, 1H, *J* = 7.6, 7.2, 1.6 Hz), 7.22 (dd, 1H, *J* = 7.6, 1.6 Hz), 7.15 (ddd, 1H, *J* = 8.0, 7.2, 0.8 Hz), 7.11 (dd, 1H, *J* = 8.0, 0.8 Hz), 1.50 (s, 6H); <sup>13</sup>C NMR (100 MHz, CDCl<sub>3</sub>) δ 180.8, 152.2, 133.6, 128.5, 124.2, 122.7, 110.7, 42.8, and 25.2; IR (ATR) 1798, 1618, 1477, 1458, 1290, 1233, 1188, 1119, 1103, 1034, 935, 876, and 750 cm<sup>-1</sup>; HRMS (DART) [M+H]<sup>+</sup> calcd for C<sub>10</sub>H<sub>11</sub>O<sub>2</sub>: 163.0754; found 163.0754.

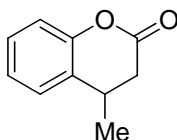

### 4-Methylchroman-2-one (**6gb**)<sup>35</sup>

Following the general procedure except for using **3f** in place of **3e**, **6gb** was obtained from **5g** as colorless oil. Yield: 58%.

<sup>1</sup>H NMR (400 MHz, CDCl<sub>3</sub>) δ 7.46-7.06 (m, 4H), 3.24-3.17 (m, 1H), 2.89 (dd, 1H, *J* = 15.8, 5.5 Hz), 2.60 (dd, 1H, *J* = 15.8, 8.6 Hz), 1.36 (d, 3H, *J* = 7.0 Hz); <sup>13</sup>C NMR (100 MHz, CDCl<sub>3</sub>) δ 168.2, 151.2, 128.2, 127.8, 126.5, 124.6, 117.0, 36.8, 28.5, and 19.8; IR (ATR) 1763, 1487, 1449, 1348, 1215, 1146, 1115, 1078, 908, and 756 cm<sup>-1</sup>; HRMS (DART) [M+H]<sup>+</sup> calcd for C<sub>10</sub>H<sub>11</sub>O<sub>2</sub>: 163.0754; found 163.0747.

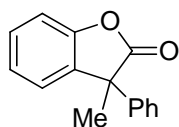

### 3-Methyl-3-phenylbenzofuran-2(3H)-one (6ha)<sup>35</sup>

Following the general procedure except for using **3f** in place of **3e**, **6ha** was obtained from **5h** as a colorless oil. Yield: 72%.

<sup>1</sup>H NMR (400 MHz, CDCl<sub>3</sub>) δ 7.39-7.15 (m, 9H), 1.90 (s, 3H); <sup>13</sup>C NMR (100 MHz, CDCl<sub>3</sub>) δ 178.6, 152.7, 139.5, 132.6, 129.0, 128.8, 127.8, 126.4, 124.52, 124.49, 111.0, 50.8, and 24.8; IR (ATR) 1800, 1477, 1462, 1445, 1227, 1148, 1024, 887, 752, 729, and 694 cm<sup>-1</sup>; HRMS (DART) [M+H]<sup>+</sup> calcd for C<sub>15</sub>H<sub>13</sub>O<sub>2</sub>: 225.0910; found 225.0904.

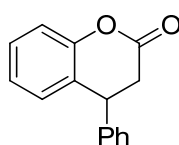

### 4-Phenylchroman-2-one (6hb)<sup>36</sup>

Following the general procedure except for using **3f** in place of **3e**, **6hb** was obtained from **5h** as a white solid (m.p. 82 °C). Yield: 16%.

<sup>1</sup>H NMR (400 MHz, CDCl<sub>3</sub>) δ 7.37-7.29 (m, 4H), 7.18-7.13 (m, 3H), 7.09 (t, 1H, *J* = 7.5 Hz), 6.98 (d, 1H, *J* = 7.5 Hz), 4.35 (t, 1H, *J* = 7.0 Hz), 3.09 (dd, 1H, *J* = 16.1, 6.2 Hz), 3.03 (dd, 1H, *J* = 16.1, 7.9 Hz); <sup>13</sup>C NMR (100 MHz, CDCl<sub>3</sub>) δ 167.6, 151.7, 140.3, 129.1, 128.8, 128.3, 127.6, 127.5, 125.8, 124.6, 117.1, 40.7, and 37.0; IR (ATR) 1765, 1485, 1454, 1213, 1130, 924, 754, and 698 cm<sup>-1</sup>; HRMS (DART) [M+H]<sup>+</sup> calcd for C<sub>15</sub>H<sub>13</sub>O<sub>2</sub>: 225.0910; found 225.0911.

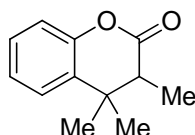

### 3,4,4-Trimethylchroman-2-one (6ia)

**6ia** was obtained from **5i** as a colorless oil. Yield: 83%.

<sup>1</sup>H NMR (400 MHz, CDCl<sub>3</sub>) δ 7.30 (dd, 1H, *J* = 7.6, 1.6 Hz), 7.25 (ddd, 1H, *J* = 7.6, 7.2, 1.6 Hz), 7.14 (ddd, 1H, *J* = 8.4, 7.2, 1.6 Hz), 7.03 (dd, 1H, *J* = 8.4, 1.6 Hz), 2.62 (q, 1H, *J* = 7.6 Hz), 1.37 (s, 3H), 1.21 (d, 3H, *J* = 7.6 Hz), 1.20 (s, 3H); <sup>13</sup>C NMR (100 MHz, CDCl<sub>3</sub>) δ 171.5, 150.1, 131.9, 128.1, 124.7, 124.6, 116.7, 45.1, 36.0, 26.4, 22.9 and 10.2; IR (ATR) 2974, 1763, 1447, 1207, 1161, 1065, 1011 and 754 cm<sup>-1</sup>; HRMS (DART) [M+H]<sup>+</sup> calcd for C<sub>12</sub>H<sub>15</sub>O<sub>2</sub>: 191.1067; found 191.1075.

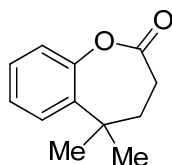

### 5,5-Dimethyl-4,5-dihydrobenzo[b]oxepin-2(3H)-one (6ib)

**6ib** was obtained from **5i** as a colorless oil. Yield: 9%.

<sup>1</sup>H NMR (400 MHz, CDCl<sub>3</sub>) δ 7.36 (dd, 1H, *J* = 8.0, 2.0 Hz), 7.29 (ddd, 1H, *J* = 7.6, 7.2, 2.0 Hz), 7.21 (ddd, 1H, *J* = 8.0, 7.2, 1.6 Hz), 7.10 (dd, 1H, *J* = 7.6, 1.6 Hz), 2.44 (t, 2H, *J* = 7.2 Hz), 2.08 (t, 2H, *J* = 7.2



Hz), 1.42 (s, 6H);  $^{13}\text{C}$  NMR (100 MHz,  $\text{CDCl}_3$ )  $\delta$  172.0, 151.6, 136.1, 128.2, 126.6, 125.8, 120.8, 41.1, 36.0, 30.7 and 29.4; IR (ATR) 2965, 1753, 1440, 1204, 1132, 1084 and  $756\text{ cm}^{-1}$ ; HRMS (DART)  $[\text{M}+\text{H}]^+$  calcd for  $\text{C}_{12}\text{H}_{15}\text{O}_2$ : 191.1067; found 191.1068.

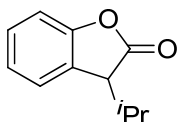

**3-Isopropylbenzofuran-2(3H)-one (6j)**<sup>37</sup>

**6j** was obtained from **5j** as a colorless oil. Yield: 99%.

$^1\text{H}$  NMR (400 MHz,  $\text{CDCl}_3$ )  $\delta$  7.27-7.18 (m, 2H), 7.00-7.10 (m, 2H), 3.56 (d, 1H,  $J = 3.9\text{ Hz}$ ), 2.41 (m, 1H), 1.01 (d, 3H,  $J = 6.9\text{ Hz}$ ), 0.89 (d, 3H,  $J = 6.9\text{ Hz}$ );  $^{13}\text{C}$  NMR (100 MHz,  $\text{CDCl}_3$ )  $\delta$  176.4, 154.1, 128.7, 126.1, 124.5, 123.8, 110.5, 49.7, 31.3, 19.3, and 18.4; IR (ATR) 2965, 1802, 1618, 1477, 1460, 1231, 1126, 1043, 891,  $750\text{ cm}^{-1}$ ; HRMS (DART)  $[\text{M}+\text{H}]^+$  calcd for  $\text{C}_{11}\text{H}_{13}\text{O}_2$ : 177.0910; found 177.0917.

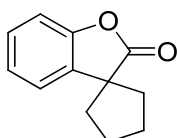

**2H-Spiro[benzofuran-3,1'-cyclopentan]-2-one (6ka)**<sup>38</sup>

Following the general procedure except for using **3f** in place of **3e**, **6ka** was obtained from **5k** as a colorless oil. Yield: 47%.

$^1\text{H}$  NMR (400 MHz,  $\text{CDCl}_3$ )  $\delta$  7.26 (ddd, 1H,  $J = 8.0, 7.6, 1.6\text{ Hz}$ ), 7.21 (dd, 1H,  $J = 7.6, 1.6\text{ Hz}$ ), 7.15 (ddd, 1H,  $J = 8.0, 7.6, 1.2\text{ Hz}$ ), 7.09 (dd, 1H,  $J = 7.6, 1.2\text{ Hz}$ ), 2.30-2.22 (m, 2H), 2.14-2.06 (m, 2H), 2.06-1.90 (m, 4H);  $^{13}\text{C}$  NMR (100 MHz,  $\text{CDCl}_3$ )  $\delta$  181.8, 152.4, 134.2, 128.2, 124.3, 122.6, 110.4, 52.0, 39.6 and 26.4; IR (ATR) 2957, 1794, 1618, 1476, 1460, 1231, 1119, 1036, 974, 876, and  $748\text{ cm}^{-1}$ ; HRMS (DART)  $[\text{M}+\text{H}]^+$  calcd for  $\text{C}_{12}\text{H}_{13}\text{O}_2$ : 189.0910; found 189.0914.

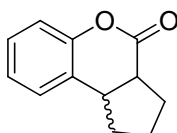

**1,3,3a,9b-Tetrahydrocyclopenta[c]chromen-4(2H)-one (6kb)**

Following the general procedure except for using **3f** in place of **3e**, **6kb** (diastereomer mixture) was obtained from **5k** as a colorless oil. Yield: 28%.

$^1\text{H}$  NMR (400 MHz,  $\text{CDCl}_3$ )  $\delta$  7.29-7.01 (m, 8H), 3.30-3.26 (m, 1H), 3.09-3.04 (m, 1H), 3.02-2.92 (m, 1H), 2.46-2.39 (m, 1H), 2.39-2.26 (m, 2H), 2.20-2.09 (m, 3H), 2.04-1.92 (m, 2H), 1.84-1.61 (m, 5H);  $^{13}\text{C}$  NMR (100 MHz,  $\text{CDCl}_3$ )  $\delta$  170.9, 170.7, 152.6, 150.6, 128.8, 128.1, 128.1, 128.0, 125.1, 124.4, 124.2, 124.1, 116.8, 116.4, 46.6, 42.9, 41.5, 40.8, 33.7, 28.7, 27.5, 23.4, 22.9 and 22.9; IR (ATR) 2955, 1755, 1487, 1452, 1219, 1144, 1123, 1105 and  $752\text{ cm}^{-1}$ ; HRMS (DART)  $[\text{M}+\text{H}]^+$  calcd for  $\text{C}_{12}\text{H}_{13}\text{O}_2$ : 189.0910; found 189.0919.

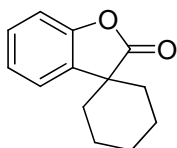

**2H-Spiro[benzofuran-3,1'-cyclohexan]-2-one (6la)**

**6la** was obtained from **5l** as a colorless oil. Yield: 72%.

$^1\text{H}$  NMR (400 MHz,  $\text{CDCl}_3$ )  $\delta$  7.40 (dd, 1H,  $J = 7.6, 0.8$  Hz), 7.28 (ddd, 1H,  $J = 8.0, 7.6, 1.6$  Hz), 7.13 (ddd, 1H,  $J = 7.6, 7.6, 0.8$  Hz), 7.10 (d, 1H,  $J = 8.0$  Hz), 1.99-1.87 (m, 4H), 1.79-1.62 (m, 6H);  $^{13}\text{C}$  NMR (100 MHz,  $\text{CDCl}_3$ )  $\delta$  179.5, 152.3, 133.4, 128.2, 123.8, 123.8, 110.6, 46.0, 33.8, 24.9 and 20.7; IR (ATR) 2933, 2855, 1796, 1460, 1231, 1150, 1007 and 752  $\text{cm}^{-1}$ ; HRMS (DART)  $[\text{M}+\text{H}]^+$  calcd for  $\text{C}_{13}\text{H}_{15}\text{O}_2$ : 203.1067; found 203.1063.

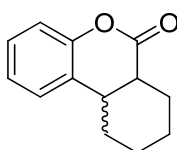

**6a,7,8,9,10,10a-Hexahydro-6H-benzo[c]chromen-6-one (6lb)**

**6lb** (diastereomer mixture) was obtained from **5l** as a colorless oil. Yield: 28%.

$^1\text{H}$  NMR (400 MHz,  $\text{CDCl}_3$ )  $\delta$  7.32-7.00 (m, 8H), 3.00-2.90 (m, 1H), 2.75-2.67 (m, 1H), 2.54-2.48 (m, 1H), 2.40-2.30 (m, 1H), 2.25-2.10 (m, 2H), 2.00-1.89 (m, 4H), 1.85-1.20 (m, 10H);  $^{13}\text{C}$  NMR (100 MHz,  $\text{CDCl}_3$ )  $\delta$  170.9, 170.4, 151.0, 150.8, 128.1, 127.5, 127.3, 124.5, 124.4, 124.3, 123.8, 116.7, 116.6, 110.6, 42.5, 39.8, 38.0, 36.0, 33.9, 28.9, 26.3, 25.0, 24.9, 24.7, 21.8 and 20.7; IR (ATR) 2933, 2859, 1751, 1485, 1452, 1217, 1153, 1113 and 760  $\text{cm}^{-1}$ ; HRMS (DART)  $[\text{M}+\text{H}]^+$  calcd for  $\text{C}_{13}\text{H}_{15}\text{O}_2$ : 203.1067; found 203.1073.

## 6. NMR spectra of newly obtained compounds

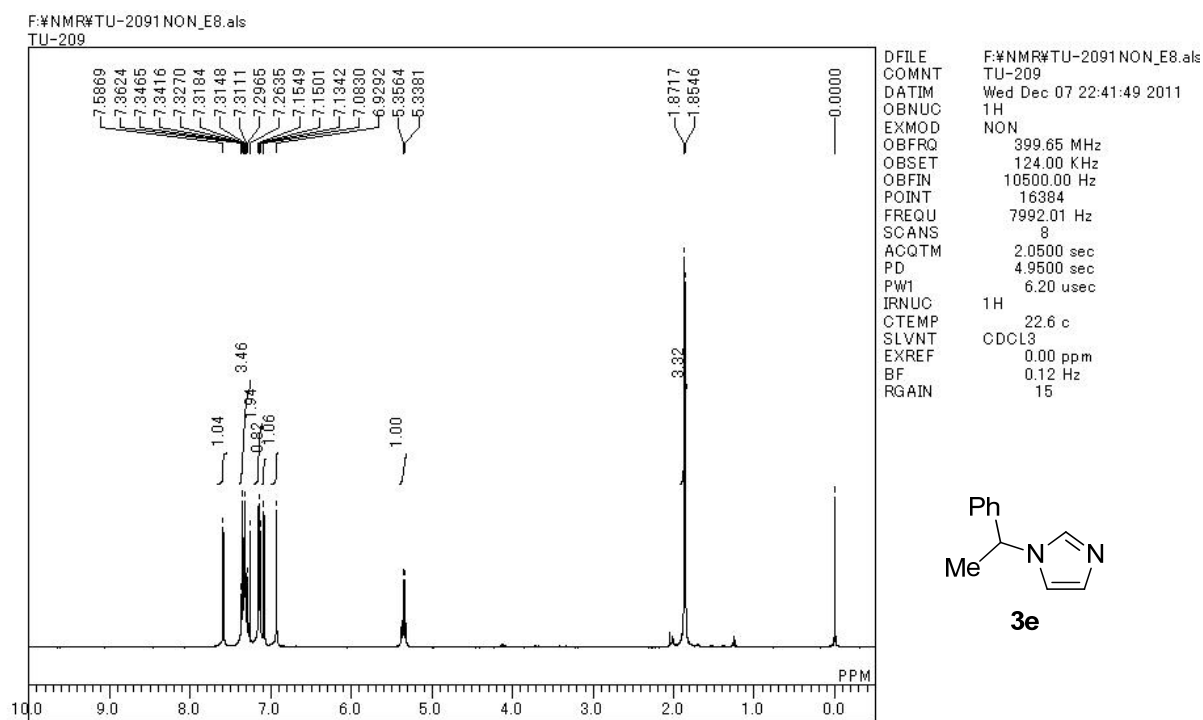

F:\NMR-1\3d#TU-3771NON\_E4\_FT.als  
TU-377

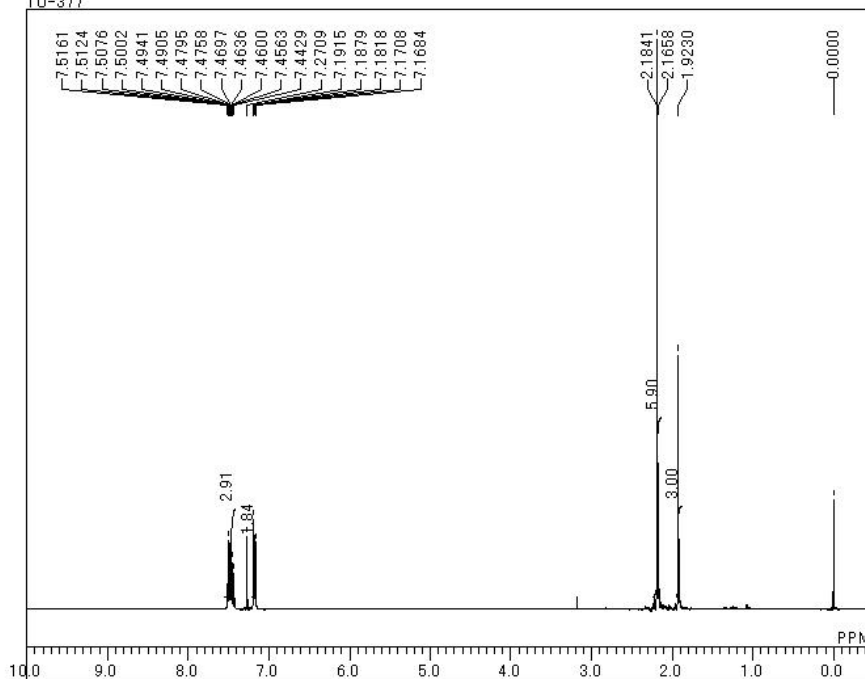

DFILE F:\NMR-1\3d#TU-3771NON  
COMNT TU-377  
DATIM Sat Feb 04 21:02:00 2012  
OBNUC 1H  
EXMOD NON  
OBFRQ 399.65 MHz  
OBSET 124.00 KHz  
OBFIN 10500.00 Hz  
POINT 16384  
FREQU 7992.01 Hz  
SCANS 8  
ACQTM 2.0500 sec  
PD 4.9500 sec  
PW1 6.20 usec  
IRNUC 1H  
CTEMP 19.3 c  
SLVNT CDCL3  
EXREF 0.00 ppm  
BF 0.12 Hz  
RGAIN 14

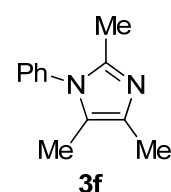

F:\NMR-1\3d#TU-377-13C1BCM\_E5\_FT.als  
TU-377-13C

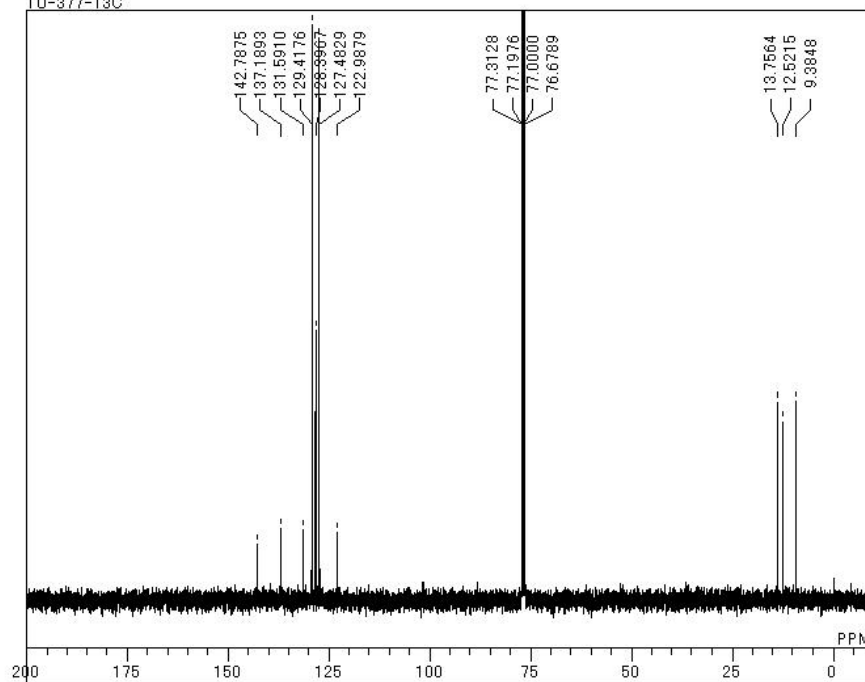

DFILE F:\NMR-1\3d#TU-377-13C1  
COMNT TU-377-13C  
DATIM Sat Feb 04 21:23:53 2012  
OBNUC 13C  
EXMOD BCM  
OBFRQ 100.40 MHz  
OBSET 125.00 KHz  
OBFIN 10500.00 Hz  
POINT 32768  
FREQU 27118.64 Hz  
SCANS 256  
ACQTM 1.2083 sec  
PD 1.7920 sec  
PW1 5.50 usec  
IRNUC 1H  
CTEMP 19.4 c  
SLVNT CDCL3  
EXREF 77.00 ppm  
BF 1.20 Hz  
RGAIN 26

H:NMR#NewCompound#HK-449-H1NON\_E5.als  
HK-449-H

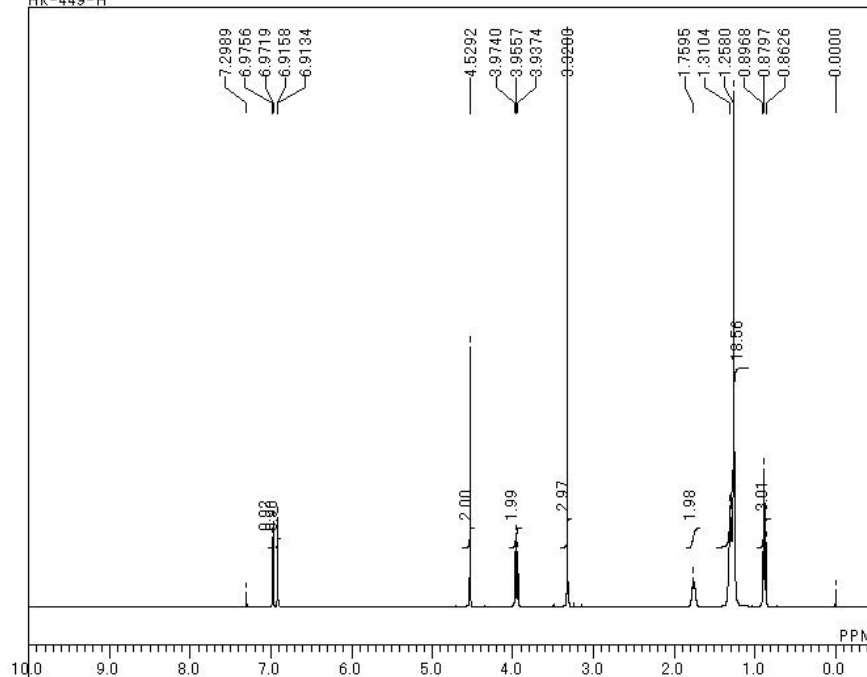

DFILE  
COMNT  
DATIM  
OBNUC  
EXMOD  
OBFRO  
OBSET  
OBFIN  
POINT  
FREQU  
SCANS  
ACQTM  
PD  
PW1  
IRNUC  
CTEMP  
SLVNT  
EXREF  
BF  
RGAIN

H:NMR#NewCompound#HK-449-H  
Wed Apr 04 00:42:36 2012  
1H  
NON  
399.65 MHz  
124.00 KHz  
10500.00 Hz  
16384  
7992.01 Hz  
8  
2.0500 sec  
4.9500 sec  
6.20 usec  
1H  
22.5 c  
CDCL3  
0.00 ppm  
0.12 Hz  
7

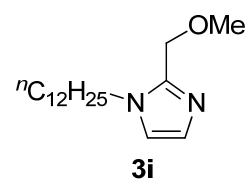

H:NMR#NewCompound#HK-449-C1BCM\_E4.als  
HK-449-C

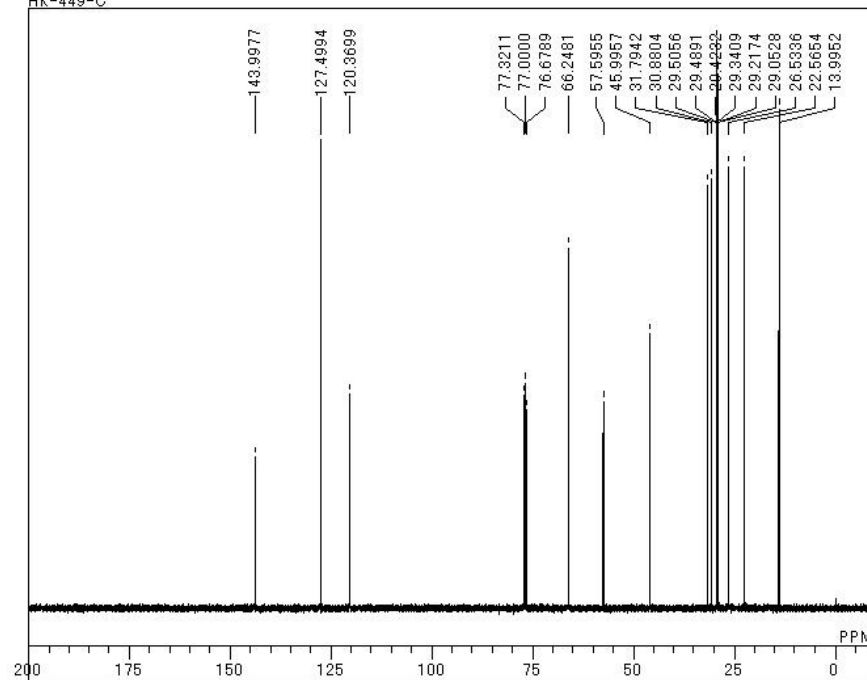

DFILE  
COMNT  
DATIM  
OBNUC  
EXMOD  
OBFRO  
OBSET  
OBFIN  
POINT  
FREQU  
SCANS  
ACQTM  
PD  
PW1  
IRNUC  
CTEMP  
SLVNT  
EXREF  
BF  
RGAIN

H:NMR#NewCompound#HK-449-C  
Wed Apr 04 00:35:49 2012  
13C  
BCM  
100.40 MHz  
125.00 KHz  
10500.00 Hz  
32768  
27118.64 Hz  
512  
1.2083 sec  
1.7920 sec  
5.50 usec  
1H  
23.4 c  
CDCL3  
77.00 ppm  
0.12 Hz  
26

H:NMR#NewCompound#HK-442-H1NON\_E6.als  
HK-442-H

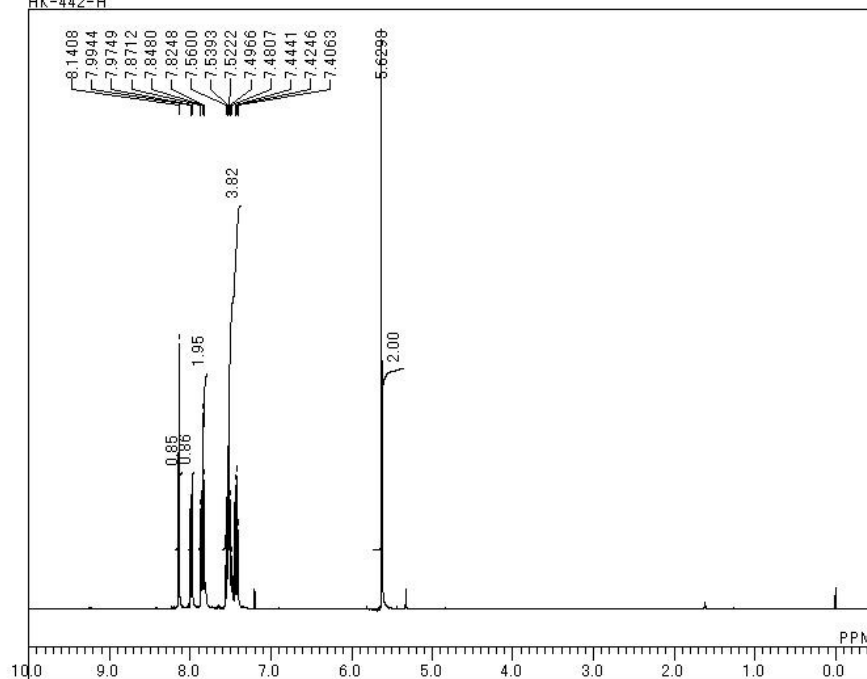

DFILE  
COMNT  
DATIM  
OBNUC  
EXMOD  
OBFRQ  
OBSET  
OBFIN  
POINT  
FREQU  
SCANS  
ACQTM  
PD  
PW1  
IRNUC  
CTEMP  
SLVNT  
EXREF  
BF  
RGAIN

H:NMR#NewCompound#HK-442-H  
Wed Apr 04 00:51:44 2012  
1H  
NON  
399.65 MHz  
124.00 KHz  
10500.00 Hz  
16384  
7992.01 Hz  
8  
2.0500 sec  
4.9500 sec  
6.20 usec  
1H  
22.5 c  
CDCL3  
0.00 ppm  
0.12 Hz  
9

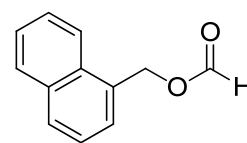

**1d**

H:NMR#NewCompound#HK-442-C1BCM\_E3.als  
HK-442-C

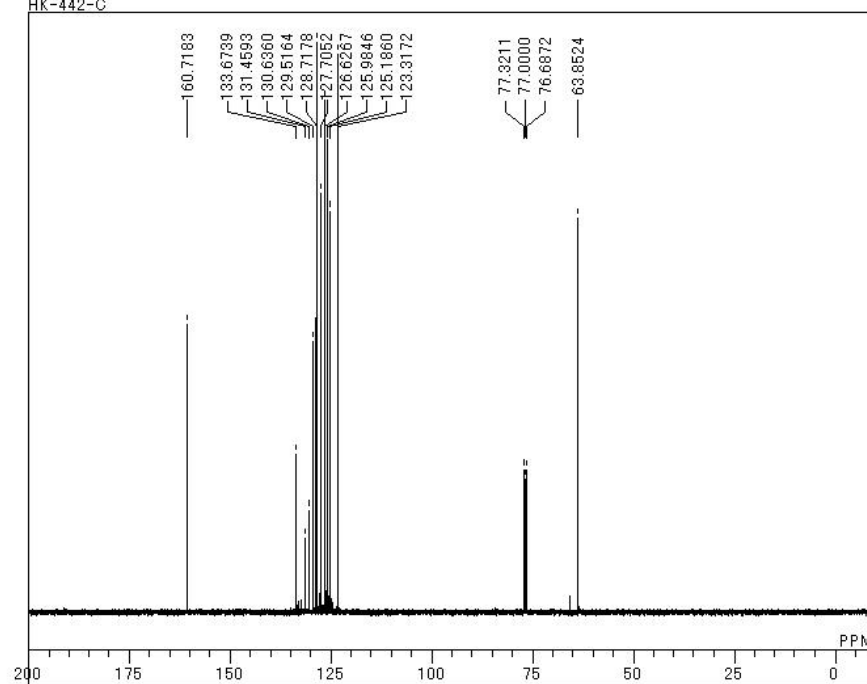

DFILE  
COMNT  
DATIM  
OBNUC  
EXMOD  
OBFRQ  
OBSET  
OBFIN  
POINT  
FREQU  
SCANS  
ACQTM  
PD  
PW1  
IRNUC  
CTEMP  
SLVNT  
EXREF  
BF  
RGAIN

H:NMR#NewCompound#HK-442-C  
Wed Apr 04 00:01:38 2012  
13C  
BCM  
100.40 MHz  
125.00 KHz  
10500.00 Hz  
32768  
27118.64 Hz  
512  
1.2083 sec  
1.7920 sec  
5.50 usec  
1H  
24.1 c  
CDCL3  
77.00 ppm  
0.12 Hz  
26

F:\NMR-1\5a-alcohol\TU-3221NON\_E12\_FT.als  
TU-322

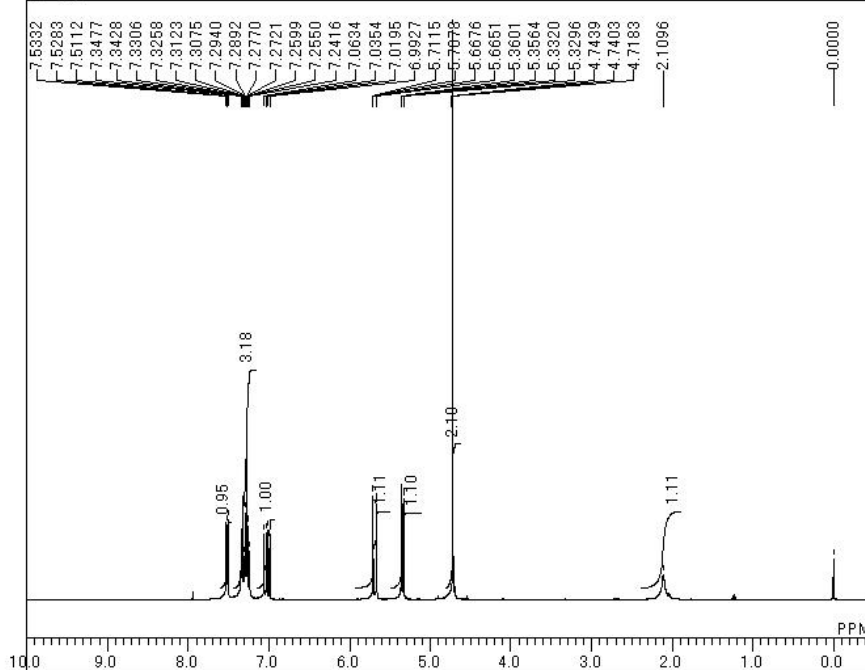

DFILE F:\NMR-1\5a-alcohol\TU-322  
COMNT TU-322  
DATIM Wed Jan 25 15:16:39 2012  
OBNUC 1H  
EXMOD NON  
OBFRQ 399.65 MHz  
OBSET 124.00 KHz  
OBFIN 10500.00 Hz  
POINT 16384  
FREQU 7992.01 Hz  
SCANS 8  
ACQTM 2.0500 sec  
PD 4.9500 sec  
PW1 6.20 usec  
IRNUC 1H  
CTEMP 22.2 c  
SLVNT CDCL3  
EXREF 0.00 ppm  
BF 0.12 Hz  
RGAIN 11

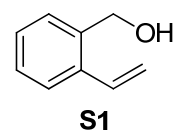

F:\NMR-1\5a-alcohol\TU-322-13C1BCM\_E13\_FT.als  
TU-322-13C

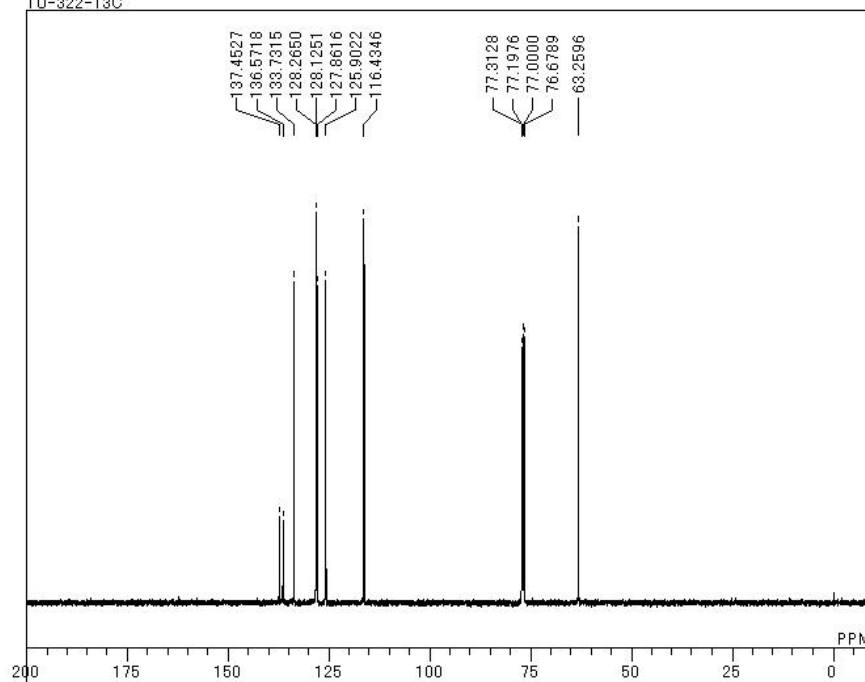

DFILE F:\NMR-1\5a-alcohol\TU-322-13C  
COMNT TU-322-13C  
DATIM Wed Jan 25 16:10:26 2012  
OBNUC 13C  
EXMOD BCM  
OBFRQ 100.40 MHz  
OBSET 125.00 KHz  
OBFIN 10500.00 Hz  
POINT 32768  
FREQU 27118.64 Hz  
SCANS 1024  
ACQTM 1.2083 sec  
PD 1.7920 sec  
PW1 5.50 usec  
IRNUC 1H  
CTEMP 22.9 c  
SLVNT CDCL3  
EXREF 77.00 ppm  
BF 1.20 Hz  
RGAIN 26

F:\NMR-1\5a\TU-2141NON\_E6\_FT.als  
TU-214

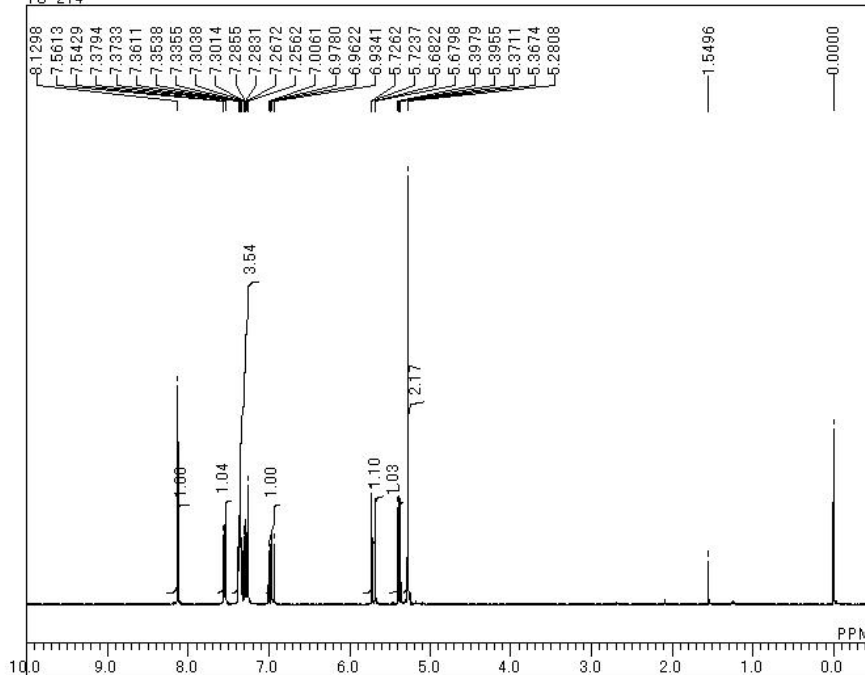

DFILE F:\NMR-1\5a\TU-2141NON.  
COMNT TU-214  
DATIM Sat Dec 10 12:01:55 2011  
OBNUC 1H  
EXMOD NON  
OBFRQ 399.65 MHz  
OBSET 124.00 KHz  
OBFIN 10500.00 Hz  
POINT 16384  
FREQU 7992.01 Hz  
SCANS 8  
ACQTM 2.0500 sec  
PD 4.9500 sec  
PW1 6.20 usec  
IRNUC 1H  
CTEMP 23.7 c  
SLVNT CDCL3  
EXREF 0.00 ppm  
BF 0.12 Hz  
RGAIN 15

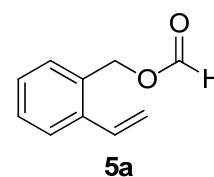

F:\NMR-1\5a\TU-214-13C-1.jdf  
TU-214-13C

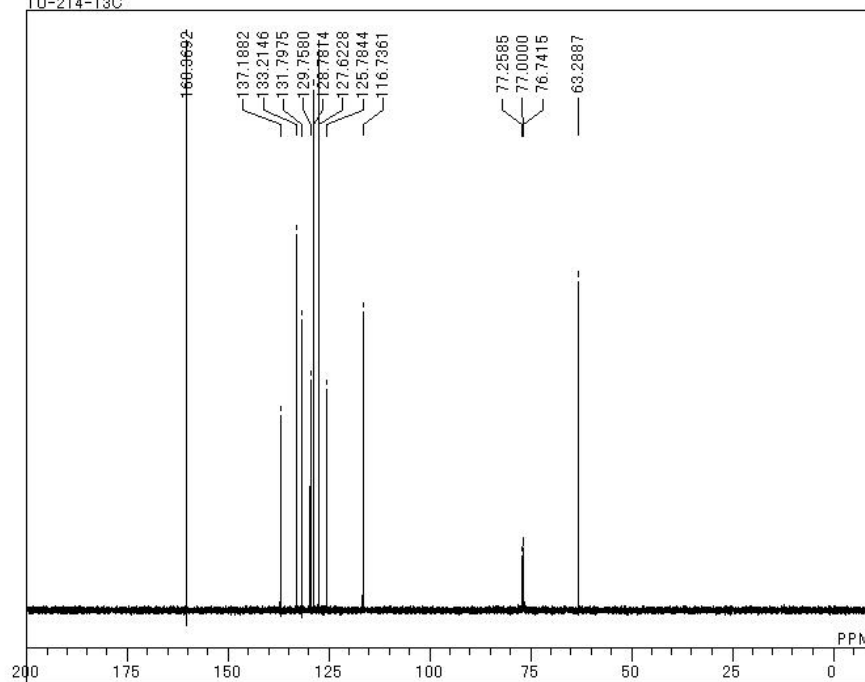

DFILE F:\NMR-1\5a\TU-214-13C-  
COMNT TU-214-13C  
DATIM 17-01-2012 21:00:27  
OBNUC 13C  
EXMOD single\_pulse\_dec  
OBFRQ 124.51 MHz  
OBSET 3.45 KHz  
OBFIN 6.00 Hz  
POINT 32768  
FREQU 39062.50 Hz  
SCANS 128  
ACQTM 0.8389 sec  
PD 1.5000 sec  
PW1 5.57 usec  
IRNUC 1H  
CTEMP 21.7 c  
SLVNT CDCL3  
EXREF 77.00 ppm  
BF 0.12 Hz  
RGAIN 50



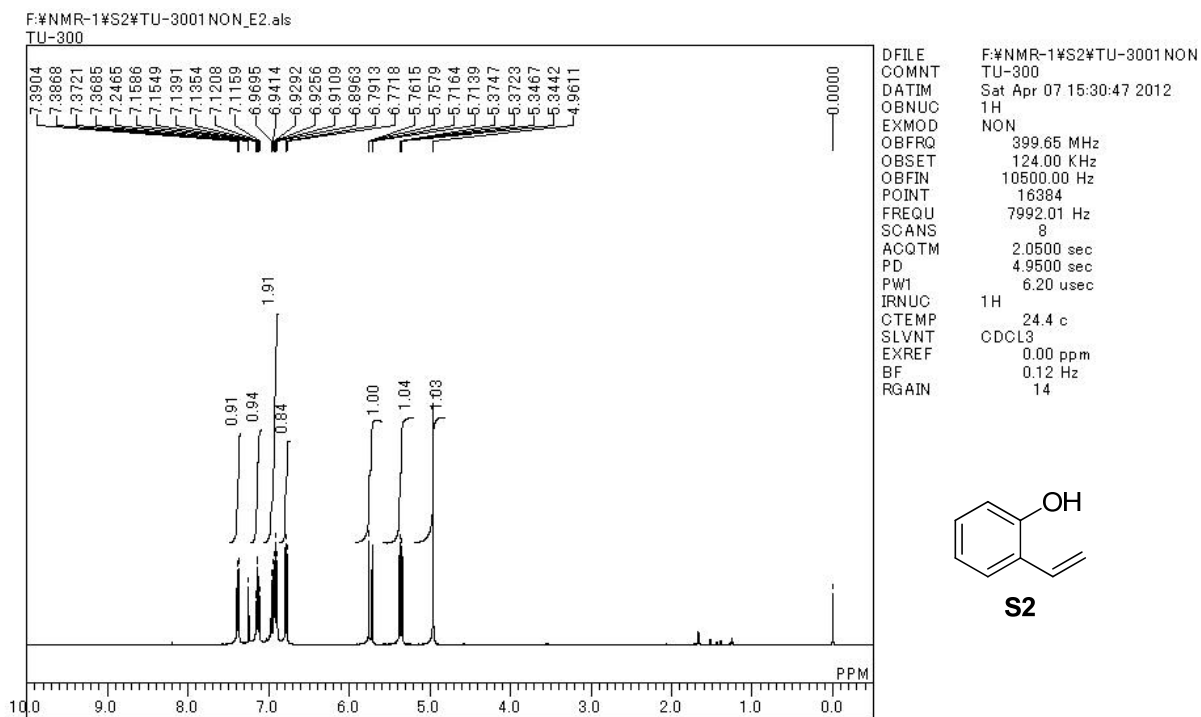

F:\NMR-1\5b\TU-3121NON\_E2\_FT.als  
TU-312

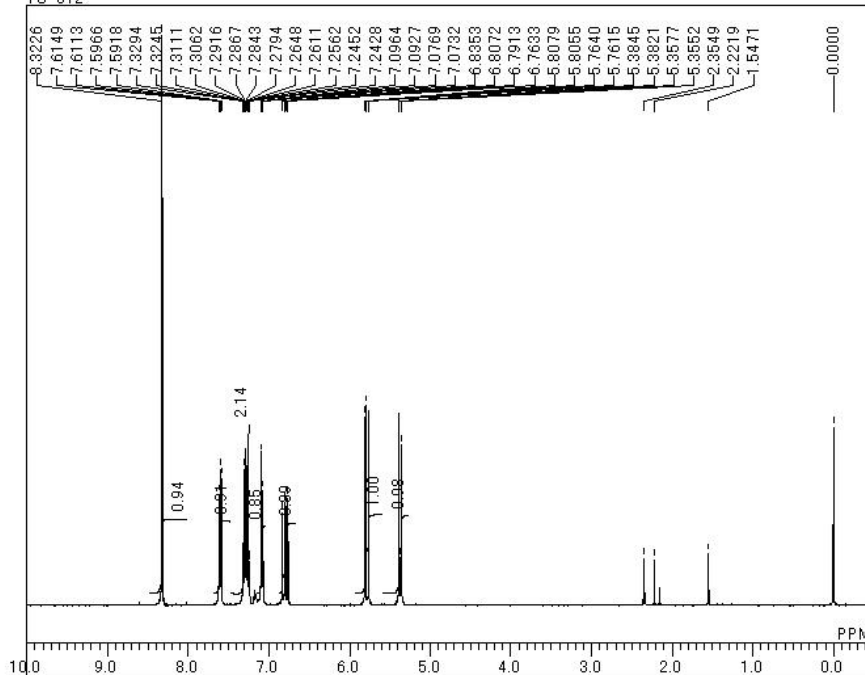

DFILE F:\NMR-1\5b\TU-3121NON  
COMNT TU-312  
DATIM Mon Jan 16 23:07:13 2012  
OBNUC 1H  
EXMOD NON  
OBFRQ 399.65 MHz  
OBSET 124.00 KHz  
OBFIN 10500.00 Hz  
POINT 16384  
FREQU 7992.01 Hz  
SCANS 8  
ACQTM 2.0500 sec  
PD 4.9500 sec  
PW1 6.20 usec  
IRNUC 1H  
CTEMP 21.7 c  
SLVNT CDCL3  
EXREF 0.00 ppm  
BF 0.12 Hz  
RGAIN 16

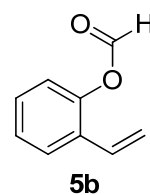

F:\NMR-1\5b\TU-312-13C-1.jdf  
TU-312-13C

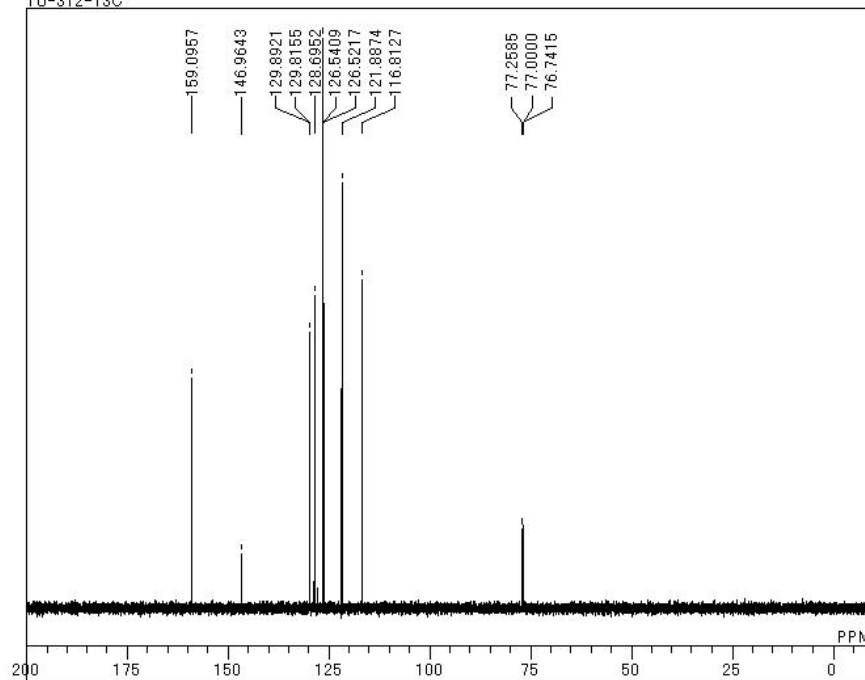

DFILE F:\NMR-1\5b\TU-312-13C-  
COMNT TU-312-13C  
DATIM 17-01-2012 21:16:31  
OBNUC 13C  
EXMOD single\_pulse\_dec  
OBFRQ 124.51 MHz  
OBSET 3.45 KHz  
OBFIN 6.00 Hz  
POINT 32768  
FREQU 39062.50 Hz  
SCANS 64  
ACQTM 0.8389 sec  
PD 1.5000 sec  
PW1 5.57 usec  
IRNUC 1H  
CTEMP 21.3 c  
SLVNT CDCL3  
EXREF 77.00 ppm  
BF 0.12 Hz  
RGAIN 50

F:\NMR-1\TU-578-31NON\_E5\_FT.als  
TU-578-3

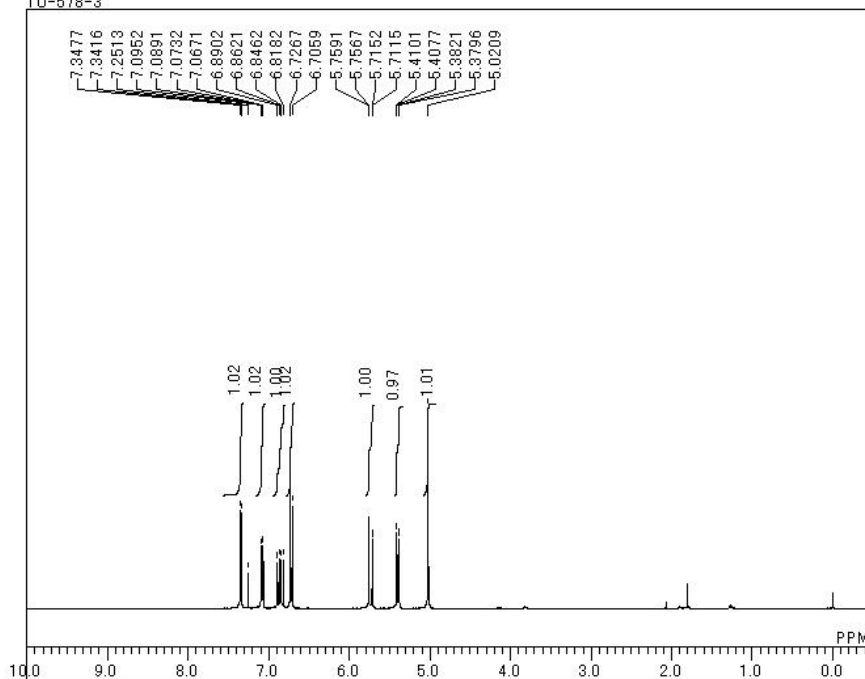

DFILE F:\NMR-1\TU-578-31NON\_I  
COMNT TU-578-3  
DATIM Mon Apr 09 23:01:55 2012  
OBNUC 1H  
EXMOD NON  
OBFRQ 399.65 MHz  
OBSET 124.00 KHz  
OBFIN 10500.00 Hz  
POINT 16384  
FREQU 7992.01 Hz  
SCANS 8  
ACQTM 2.0500 sec  
PD 4.9500 sec  
PW1 6.20 usec  
IRNUG 1H  
CTEMP 25.5 c  
SLVNT CDCL3  
EXREF 0.00 ppm  
BF 0.12 Hz  
RGAIN 13

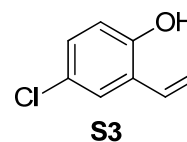

F:\NMR-1\5c#TU-314-pure1NON\_E5\_FT.als  
TU-314-pure

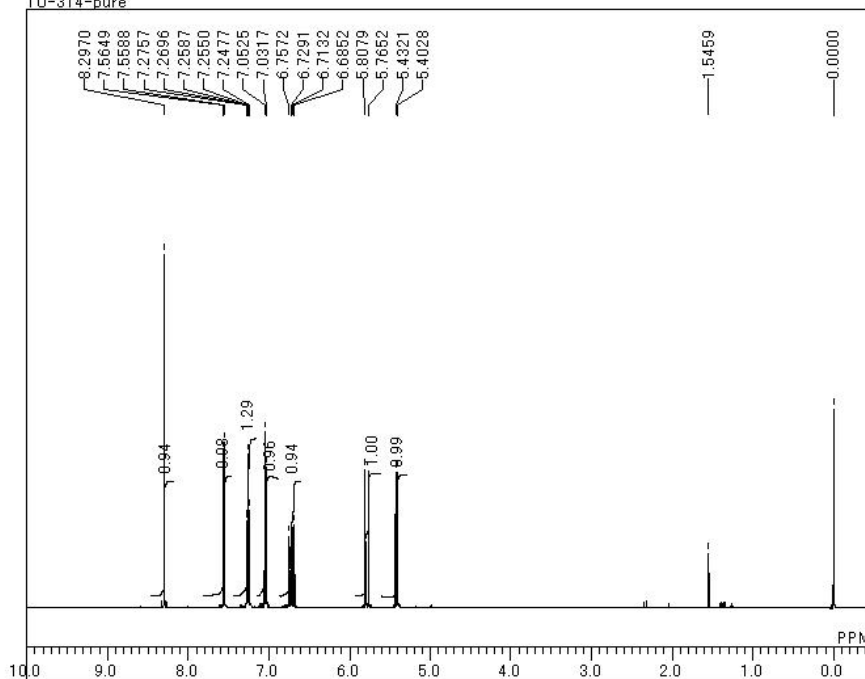

DFILE F:\NMR-1\5c#TU-314-pure  
COMNT TU-314-pure  
DATIM Wed Jan 18 11:55:33 2012  
OBNUC 1H  
EXMOD NON  
OBFRQ 399.65 MHz  
OBSET 124.00 KHz  
OBFIN 10500.00 Hz  
POINT 16384  
FREQU 7992.01 Hz  
SCANS 8  
ACQTM 2.0500 sec  
PD 4.9500 sec  
PW1 6.20 usec  
IRNUC 1H  
CTEMP 22.5 c  
SLVNT CDCL3  
EXREF 0.00 ppm  
BF 0.12 Hz  
RGAIN 16

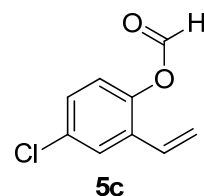

F:\NMR-1\5c#TU-314-13C1BCM\_E7\_FT.als  
TU-314-13C

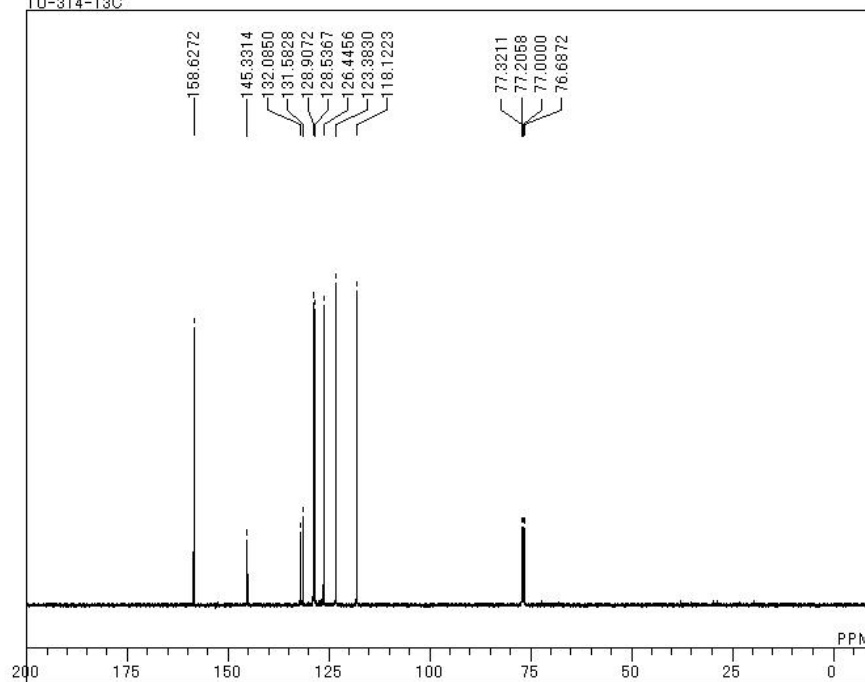

DFILE F:\NMR-1\5c#TU-314-13C1  
COMNT TU-314-13C  
DATIM Wed Jan 18 12:27:12 2012  
OBNUC 13C  
EXMOD BCM  
OBFRQ 100.40 MHz  
OBSET 125.00 KHz  
OBFIN 10500.00 Hz  
POINT 32768  
FREQU 27118.64 Hz  
SCANS 256  
ACQTM 1.2083 sec  
PD 1.7920 sec  
PW1 5.50 usec  
IRNUC 1H  
CTEMP 23.1 c  
SLVNT CDCL3  
EXREF 77.00 ppm  
BF 1.20 Hz  
RGAIN 27

F:\NMR-1\5d-alc\TU-2791NON\_E8\_FT.als  
TU-279

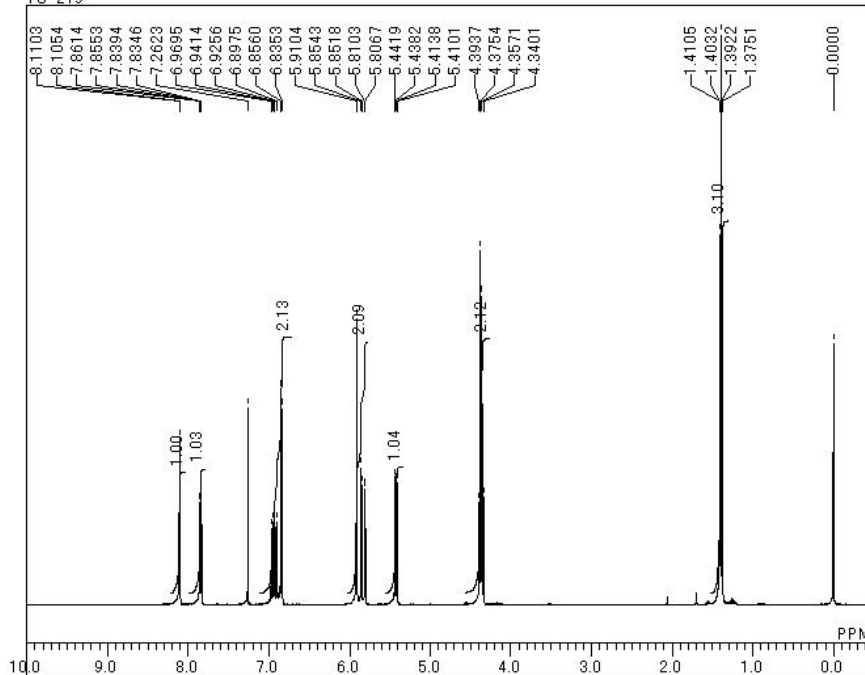

DFILE F:\NMR-1\5d-alc\TU-279  
COMNT TU-279  
DATIM Sun Jan 08 15:13:50 2012  
OBNUC 1H  
EXMOD NON  
OBFRQ 399.65 MHz  
OBSET 124.00 KHz  
OBFIN 10500.00 Hz  
POINT 16384  
FREQU 7992.01 Hz  
SCANS 8  
ACQTM 2.0500 sec  
PD 4.9500 sec  
PW1 6.20 usec  
IRNUC 1H  
CTEMP 21.8 c  
SLVNT CDCL3  
EXREF 0.00 ppm  
BF 0.12 Hz  
RGAIN 16

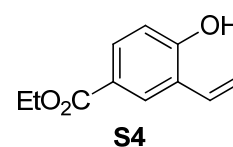

F:\NMR-1\5d-alc\TU-279-13C1BCM\_E26\_FT.als  
TU-279-13C

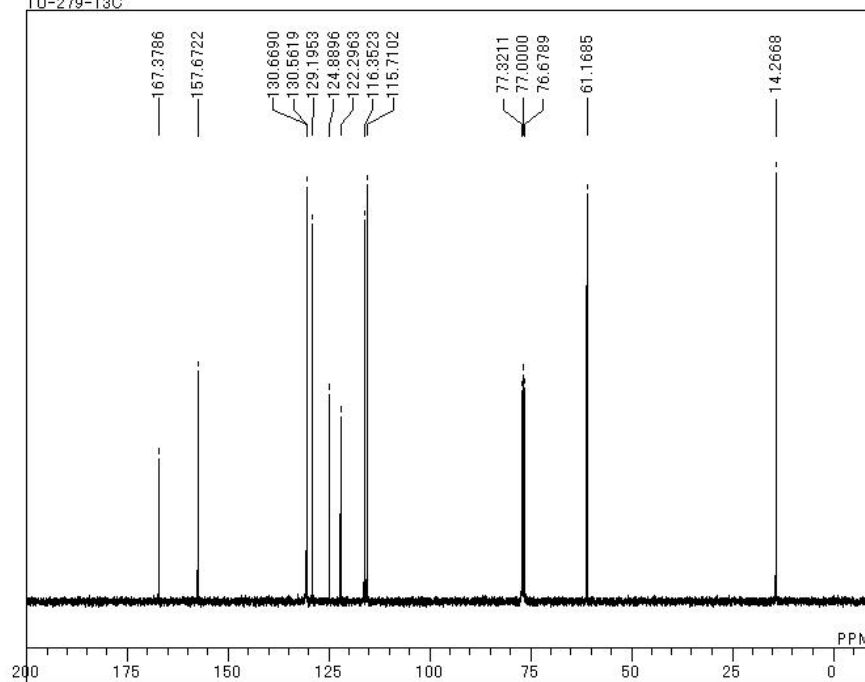

DFILE F:\NMR-1\5d-alc\TU-279-13C  
COMNT TU-279-13C  
DATIM Mon Jan 23 14:18:38 2012  
OBNUC 13C  
EXMOD BCM  
OBFRQ 100.40 MHz  
OBSET 125.00 KHz  
OBFIN 10500.00 Hz  
POINT 32768  
FREQU 27118.64 Hz  
SCANS 256  
ACQTM 1.2083 sec  
PD 1.7920 sec  
PW1 5.50 usec  
IRNUC 1H  
CTEMP 23.4 c  
SLVNT CDCL3  
EXREF 77.00 ppm  
BF 1.20 Hz  
RGAIN 26

F:\NMR-1\5d#TU-2851NON\_E2\_FT.als  
TU-285

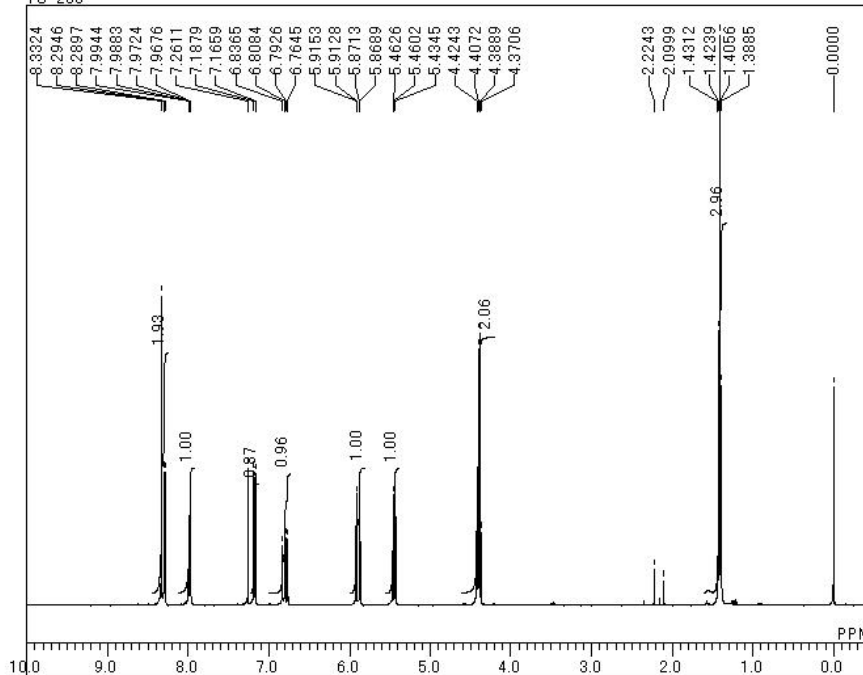

DFILE F:\NMR-1\5d#TU-2851NON  
COMNT TU-285  
DATIM Mon Jan 09 12:54:40 2012  
OBNUC 1H  
EXMOD NON  
OBFRQ 399.65 MHz  
OBSET 124.00 KHz  
OBFIN 10500.00 Hz  
POINT 16384  
FREQU 7992.01 Hz  
SCANS 8  
ACQTM 2.0500 sec  
PD 4.9500 sec  
PW1 6.20 usec  
IRNUC 1H  
CTEMP 22.8 c  
SLVNT CDCL3  
EXREF 0.00 ppm  
BF 0.12 Hz  
RGAIN 16

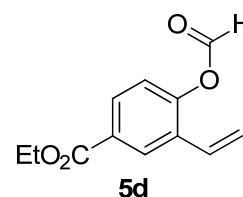

F:\NMR-1\5d#TU-285-13C1BCM\_E52\_FT.als  
TU-285-13C

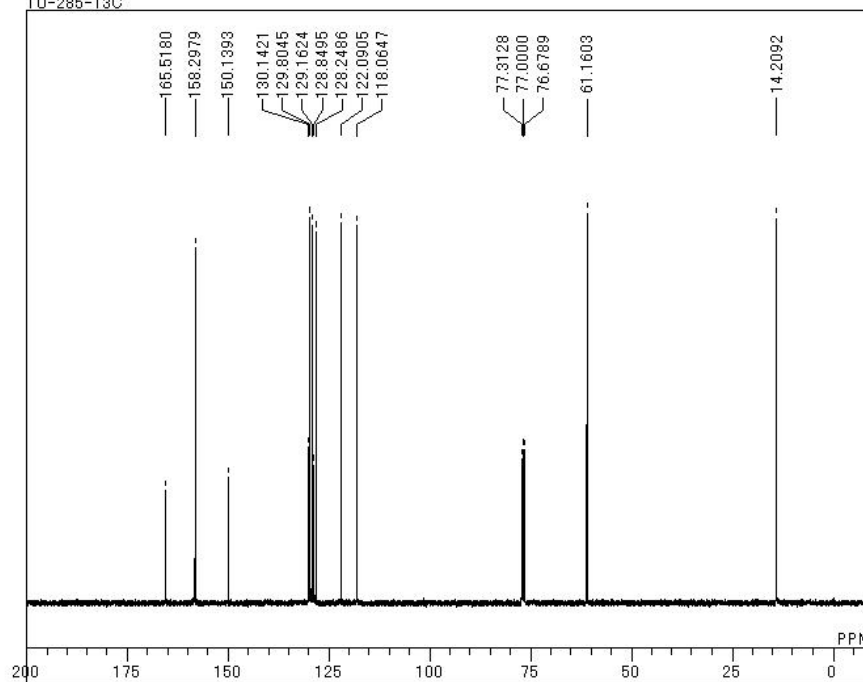

DFILE F:\NMR-1\5d#TU-285-13C1  
COMNT TU-285-13C  
DATIM Thu Jan 19 19:31:46 2012  
OBNUC 13C  
EXMOD BCM  
OBFRQ 100.40 MHz  
OBSET 125.00 KHz  
OBFIN 10500.00 Hz  
POINT 32768  
FREQU 27118.64 Hz  
SCANS 256  
ACQTM 1.2083 sec  
PD 1.7920 sec  
PW1 5.50 usec  
IRNUC 1H  
CTEMP 22.6 c  
SLVNT CDCL3  
EXREF 77.00 ppm  
BF 1.20 Hz  
RGAIN 26

F:\NMR-1\5e#TU-1831NON\_E24\_FT.als  
TU-183

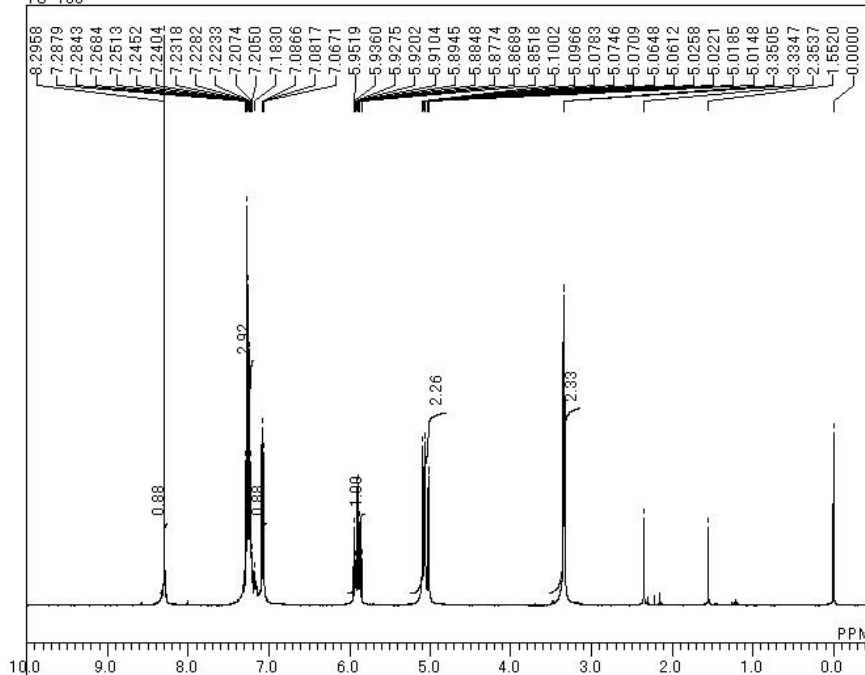

DFILE F:\NMR-1\5e#TU-1831NON  
COMNT TU-183  
DATIM Tue Nov 29 20:08:28 2011  
OBNUC 1H  
EXMOD NON  
OBFRQ 399.65 MHz  
OBSET 124.00 KHz  
OBFIN 10500.00 Hz  
POINT 16384  
FREQU 7992.01 Hz  
SCANS 8  
ACQTM 2.0500 sec  
PD 4.9500 sec  
PW1 6.20 usec  
IRNUC 1H  
CTEMP 22.5 c  
SLVNT CDCL3  
EXREF 0.00 ppm  
BF 0.12 Hz  
RGAIN 13

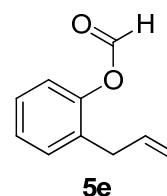

F:\NMR-1\5e#TU-183-13C1BCM\_E8\_FT.als  
TU-183-13C

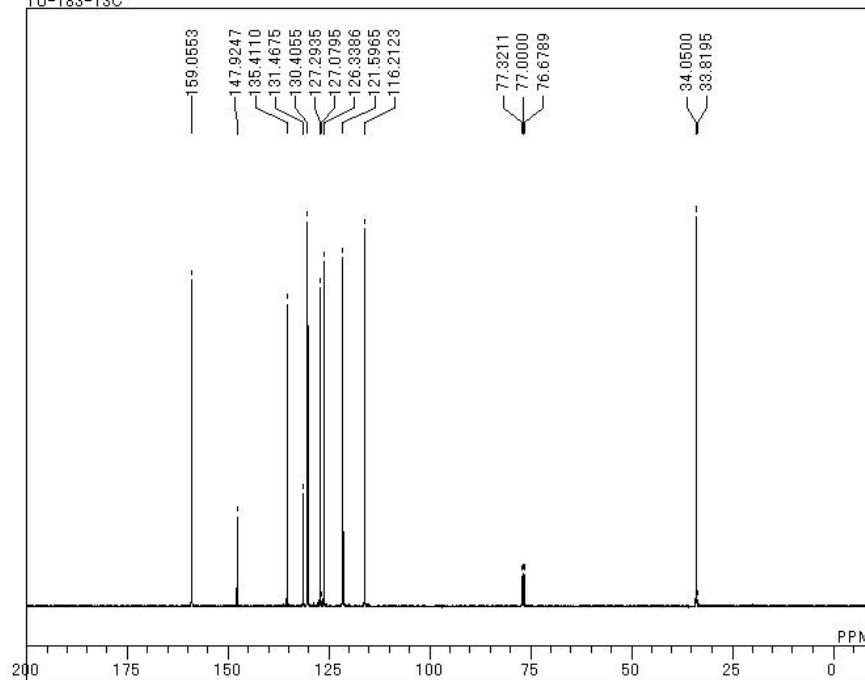

DFILE F:\NMR-1\5e#TU-183-13C1  
COMNT TU-183-13C  
DATIM Thu Jan 19 12:10:44 2012  
OBNUC 13C  
EXMOD BCM  
OBFRQ 100.40 MHz  
OBSET 125.00 KHz  
OBFIN 10500.00 Hz  
POINT 32768  
FREQU 27118.64 Hz  
SCANS 256  
ACQTM 1.2083 sec  
PD 1.7920 sec  
PW1 5.50 usec  
IRNUC 1H  
CTEMP 22.5 c  
SLVNT CDCL3  
EXREF 77.00 ppm  
BF 1.20 Hz  
RGAIN 25

F:\NMR-1\S5\TU-0821NON\_E3\_FT.als  
TU-082

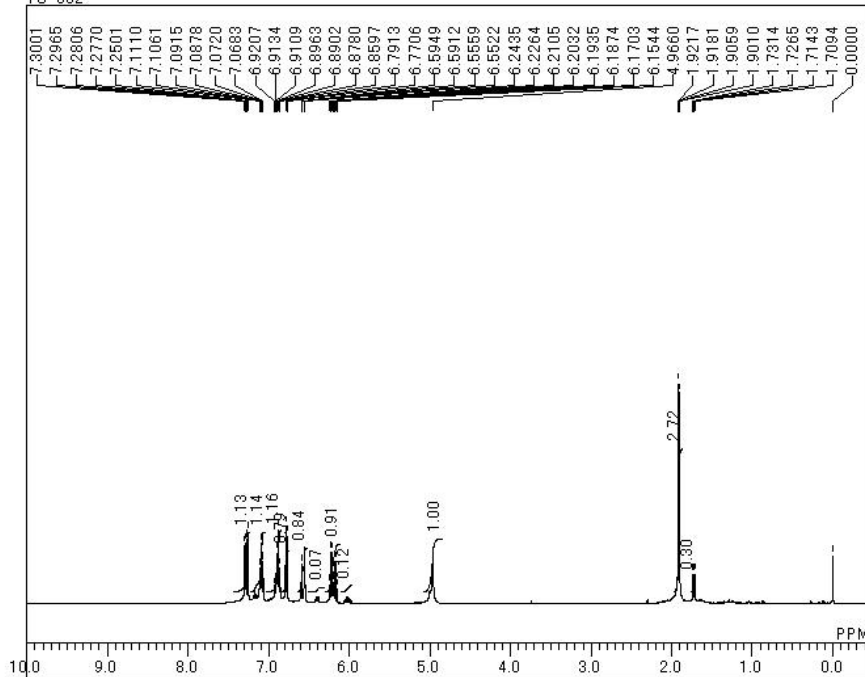

DFILE F:\NMR-1\S5\TU-0821NON  
COMNT TU-082  
DATIM Sat Apr 07 16:39:30 2012  
OBNUC 1H  
EXMOD NON  
OBFRQ 399.65 MHz  
OBSET 124.00 KHz  
OBFIN 10500.00 Hz  
POINT 16384  
FREQU 7992.01 Hz  
SCANS 8  
ACQTM 2.0500 sec  
PD 4.9500 sec  
PW1 6.20 usec  
IRNUG 1H  
CTEMP 23.4 c  
SLVNT CDCL3  
EXREF 0.00 ppm  
BF 0.12 Hz  
RGAIN 15

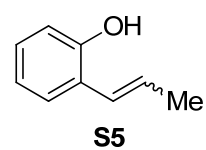



F:\NMR-1\5#TU-3211NON\_E34\_FT.als  
TU-321

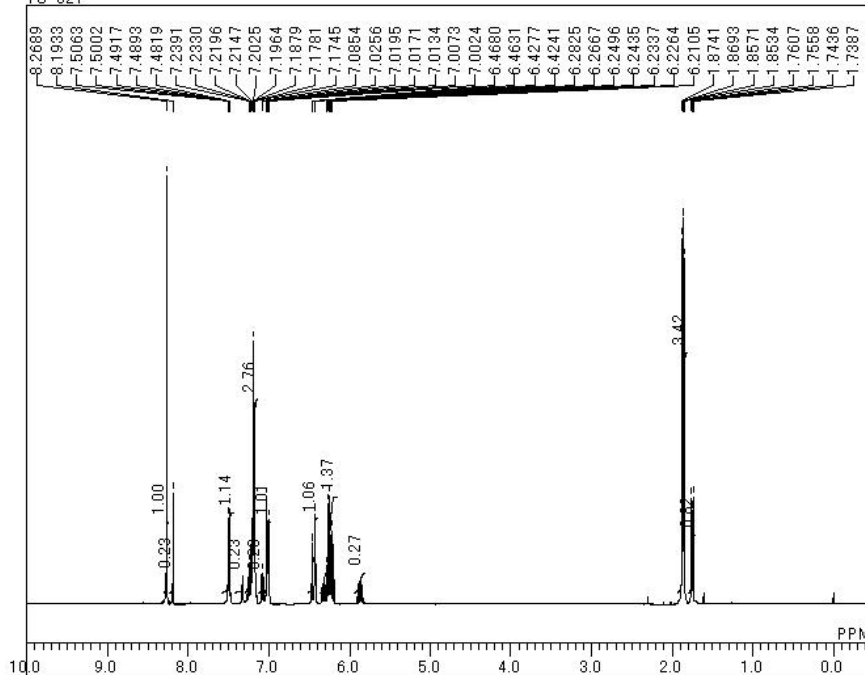

DFILE F:\NMR-1\5#TU-3211NON\_ COMNT TU-321 DATIM Thu Jan 19 16:33:53 2012 OBNUC 1H EXMOD NON OBFRQ 399.65 MHz OBSET 124.00 KHz OBFIN 10500.00 Hz POINT 16384 FREQU 7992.01 Hz SCANS 8 ACQTM 2.0500 sec PD 4.9500 sec PW1 6.20 usec IRNUC 1H CTEMP 21.8 c SLVNT CDCL3 EXREF 0.00 ppm BF 0.12 Hz RGAIN 7

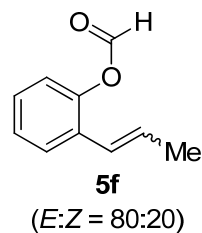

F:\NMR-1\5#TU-321-13C1BCM\_E35\_FT.als  
TU-321-13C

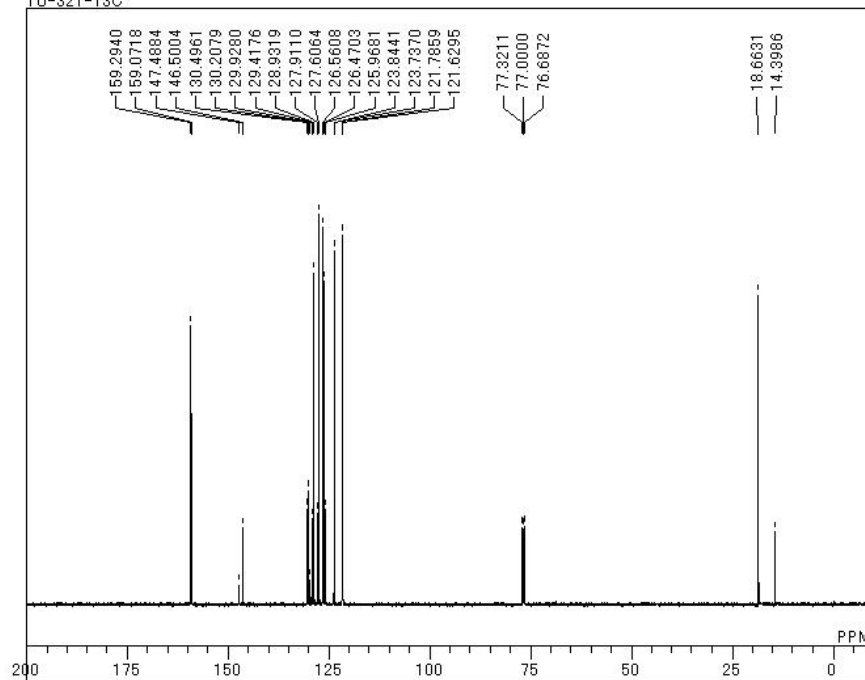

DFILE F:\NMR-1\5#TU-321-13C1 COMNT TU-321-13C DATIM Thu Jan 19 16:51:57 2012 OBNUC 13C EXMOD BCM OBFRQ 100.40 MHz OBSET 125.00 KHz OBFIN 10500.00 Hz POINT 32768 FREQU 27118.64 Hz SCANS 256 ACQTM 1.2083 sec PD 1.7920 sec PW1 5.50 usec IRNUC 1H CTEMP 22.9 c SLVNT CDCL3 EXREF 77.00 ppm BF 1.20 Hz RGAIN 26

F:\NMR\TU-3241NON\_E6.als  
TU-324

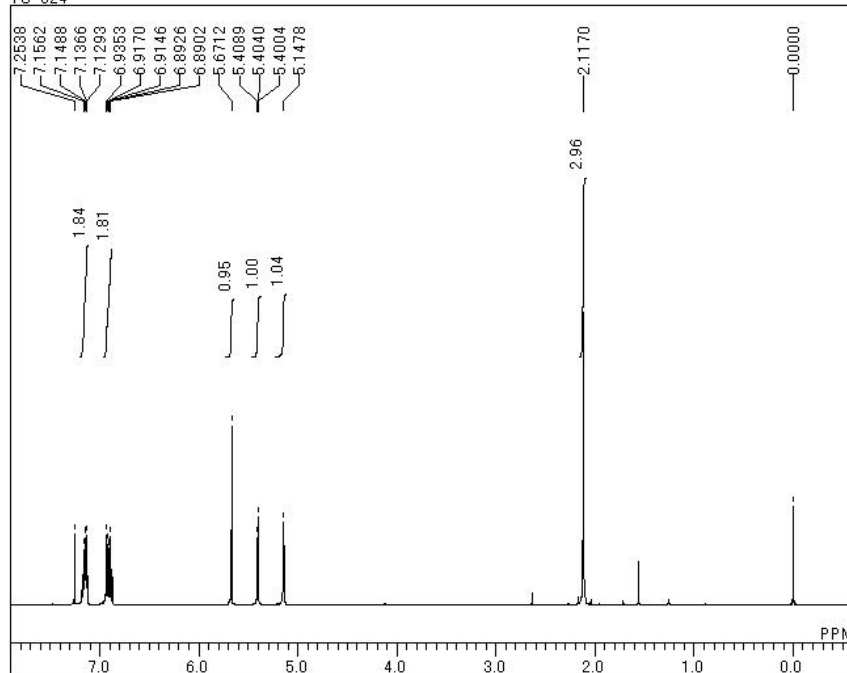

DFILE F:\NMR\TU-3241NON\_E6.als  
COMNT TU-324  
DATIM Sat Jan 21 18:30:49 2012  
OBNUC 1H  
EXMOD NON  
OBFRQ 399.65 MHz  
OBSET 124.00 KHz  
OBFIN 10500.00 Hz  
POINT 16384  
FREQU 7992.01 Hz  
SCANS 8  
ACQTM 2.0500 sec  
PD 4.9500 sec  
PW1 6.20 usec  
IRNUC 1H  
CTEMP 24.0 c  
SLVNT CDCL3  
EXREF 0.00 ppm  
BF 0.12 Hz  
RGAIN 15

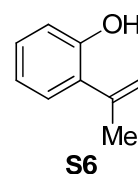

F:\NMR-1\5g#TU-3321NON\_E8\_FT.als  
TU-332

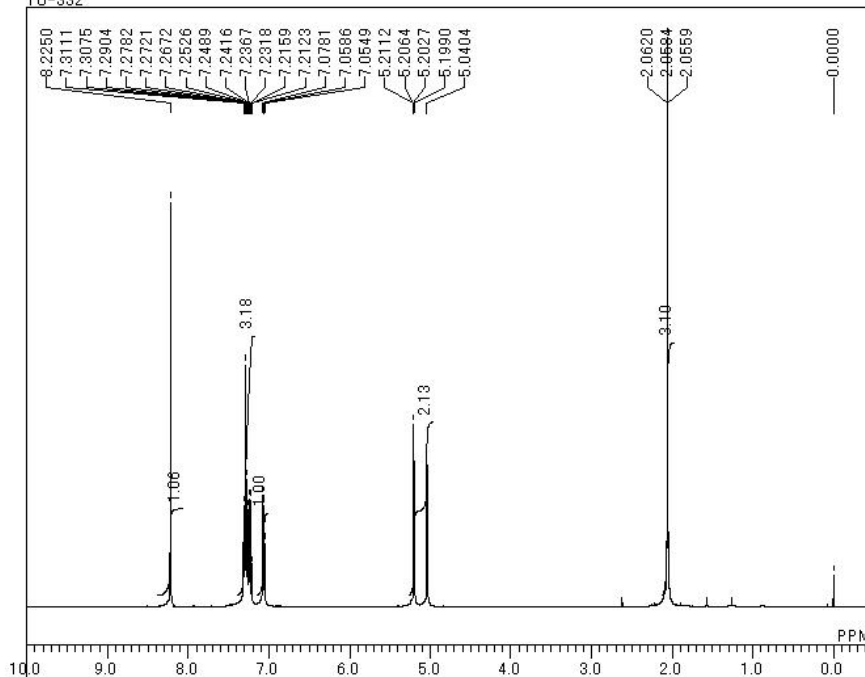

DFILE  
COMNT  
DATIM  
OBNUC  
EXMOD  
OBFRQ  
OBSET  
OBFIN  
POINT  
FREQU  
SCANS  
ACQTM  
PD  
PW1  
IRNUC  
CTEMP  
SLVNT  
EXREF  
BF  
RGAIN

F:\NMR-1\5g#TU-3321NON  
TU-332  
Tue Jan 24 13:11:10 2012  
1H  
NON  
399.65 MHz  
124.00 KHz  
10500.00 Hz  
16384  
7992.01 Hz  
8  
2.0500 sec  
4.9500 sec  
6.20 usec  
1H  
22.1 c  
CDCL3  
0.00 ppm  
0.12 Hz  
11

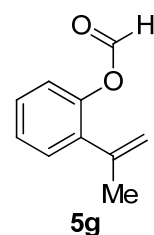

F:\NMR-1\5g#TU-332-13C1BCM\_E9\_FT.als  
TU-332-13C

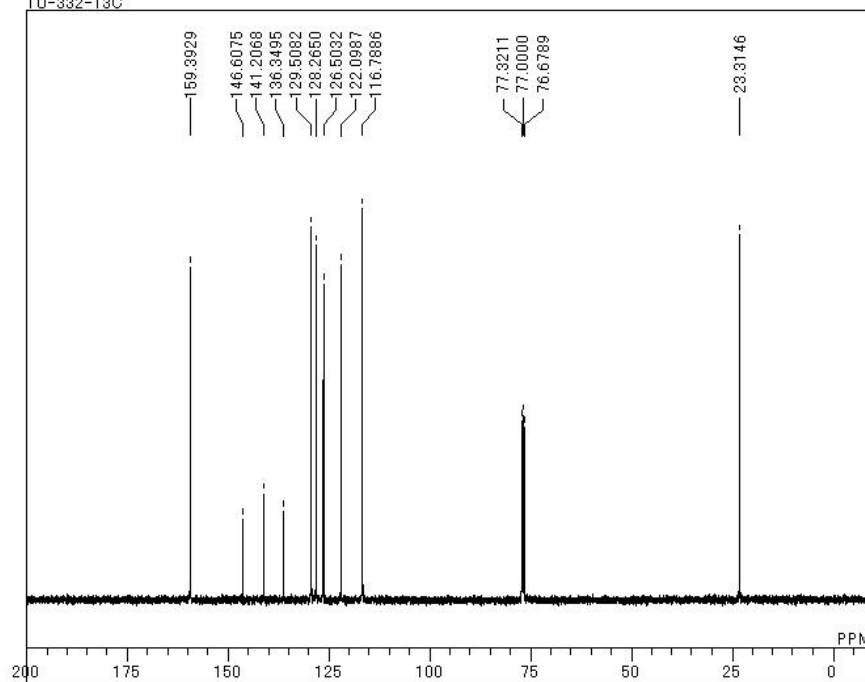

DFILE  
COMNT  
DATIM  
OBNUC  
EXMOD  
OBFRQ  
OBSET  
OBFIN  
POINT  
FREQU  
SCANS  
ACQTM  
PD  
PW1  
IRNUC  
CTEMP  
SLVNT  
EXREF  
BF  
RGAIN

F:\NMR-1\5g#TU-332-13C1  
TU-332-13C  
Tue Jan 24 13:26:17 2012  
13C  
BCM  
100.40 MHz  
125.00 KHz  
10500.00 Hz  
32768  
27118.64 Hz  
256  
1.2083 sec  
1.7920 sec  
5.50 usec  
1H  
22.4 c  
CDCL3  
77.00 ppm  
1.20 Hz  
26

C:\Documents and Settings\Administrator\Desktop\ヒドロエステル化NMR\ueda NMR\元のNMR\NMR-1\S7\S7-Hals  
TU-011

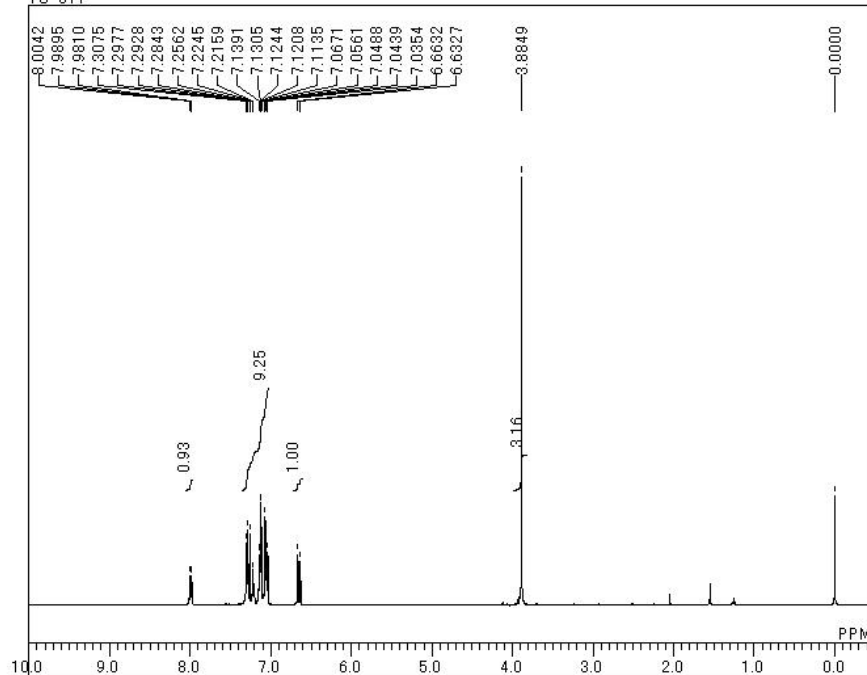

DFILE  
COMNT  
TU-011  
DATIM  
Thu Oct 06 21:20:37 2011  
OBNUC  
1H  
EXMOD  
NON  
OBFRO  
399.65 MHz  
OBSET  
124.00 KHz  
OBFIN  
10500.00 Hz  
POINT  
16384  
FREQU  
7992.01 Hz  
SCANS  
8  
ACQTM  
2.0500 sec  
PD  
4.9500 sec  
PW1  
6.20 usec  
IRNUG  
1H  
CTEMP  
24.4 c  
SLVNT  
CDCL3  
EXREF  
0.00 ppm  
BF  
0.12 Hz  
RGAIN  
16

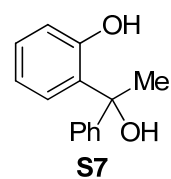

C:\Documents and Settings\Administrator\Desktop\ヒドロエステル化NMR\ueda NMR\元のNMR\NMR-1\S8\S8-H.als  
TU-112

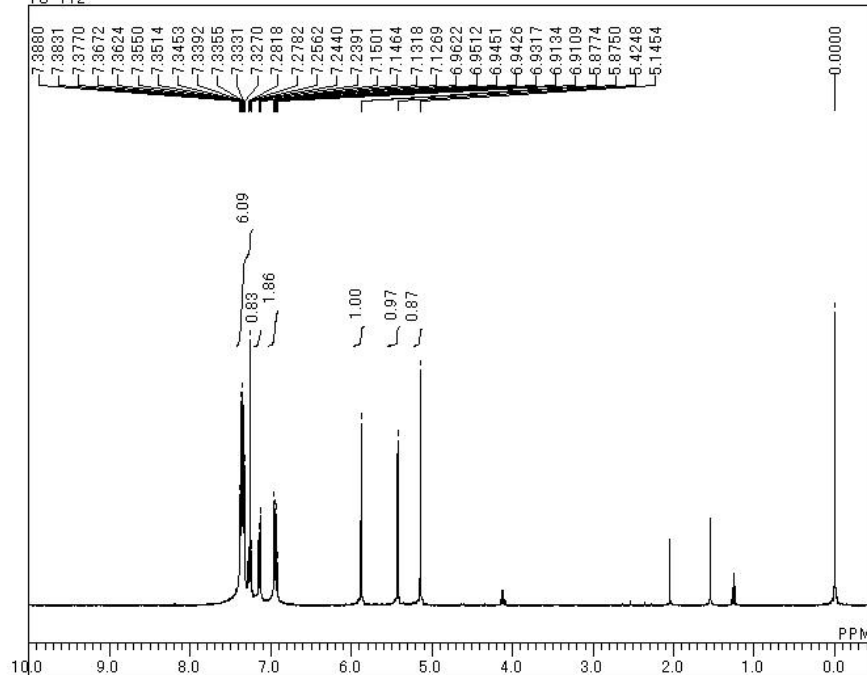

DFILE  
COMNT  
TU-112  
DATIM  
OBNUC  
1H  
EXMOD  
OBFRO  
OBSET  
OBFIN  
POINT  
FREQU  
SCANS  
ACQTM  
PD  
PW1  
IRNUG  
CTEMP  
SLVNT  
EXREF  
BF  
RGAIN

C:\Documents and Settings\Mon Nov 28 08:59:40 2011  
NON  
399.65 MHz  
124.00 KHz  
10500.00 Hz  
16384  
7992.01 Hz  
8  
2.0500 sec  
4.9500 sec  
6.20 usec  
1H  
22.3 c  
CDCL3  
0.00 ppm  
0.12 Hz  
17

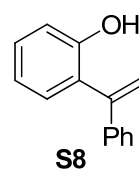

F:\NMR-1\5h\TU-3301NON\_E1\_FT.als  
TU-330

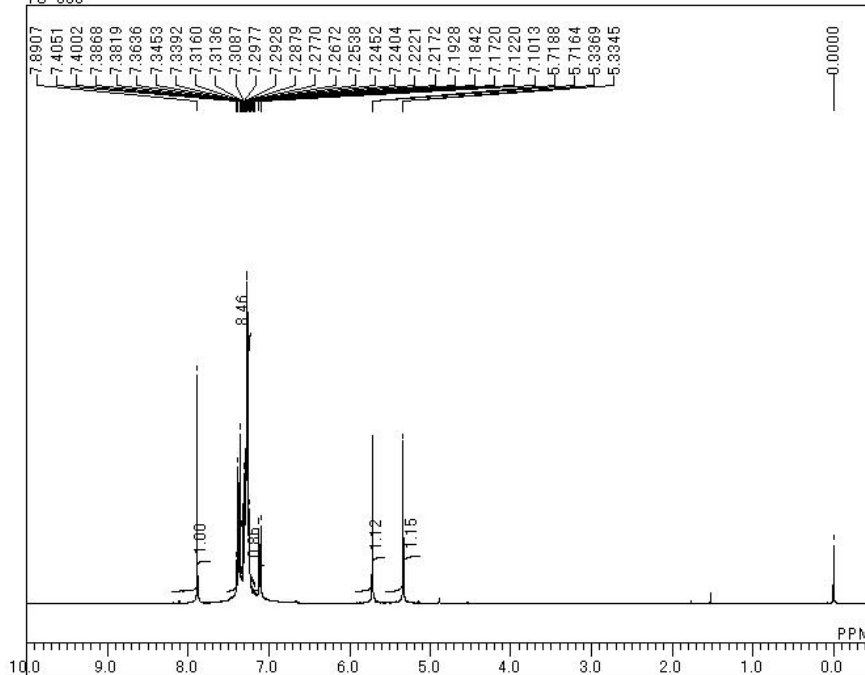

DFILE F:\NMR-1\5h\TU-3301NON  
COMNT TU-330  
DATIM Sun Jan 22 13:59:26 2012  
OBNUC 1H  
EXMOD NON  
OBFRQ 399.65 MHz  
OBSET 124.00 KHz  
OBFIN 10500.00 Hz  
POINT 16384  
FREQU 7992.01 Hz  
SCANS 8  
ACQTM 2.0500 sec  
PD 4.9500 sec  
PW1 6.20 usec  
IRNUC 1H  
CTEMP 23.1 c  
SLVNT CDCL3  
EXREF 0.00 ppm  
BF 0.12 Hz  
RGAIN 12

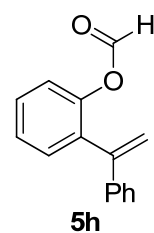

F:\NMR-1\5h\TU-330-13C1BCM\_E2\_FT.als  
TU-330-13C

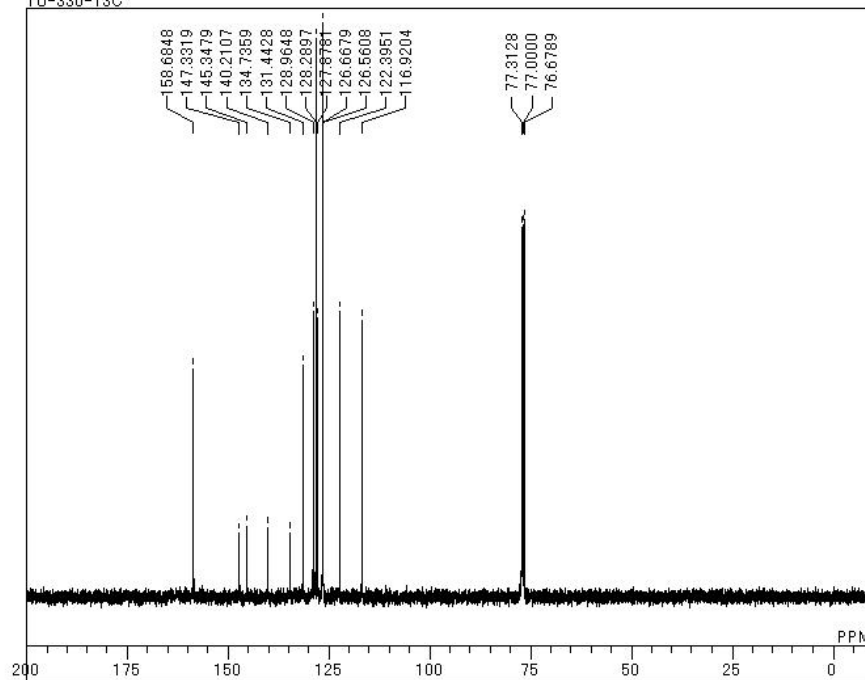

DFILE F:\NMR-1\5h\TU-330-13C1  
COMNT TU-330-13C  
DATIM Sun Jan 22 14:17:25 2012  
OBNUC 13C  
EXMOD BCM  
OBFRQ 100.40 MHz  
OBSET 125.00 KHz  
OBFIN 10500.00 Hz  
POINT 32768  
FREQU 27118.64 Hz  
SCANS 256  
ACQTM 1.2083 sec  
PD 1.7920 sec  
PW1 5.50 usec  
IRNUC 1H  
CTEMP 23.3 c  
SLVNT CDCL3  
EXREF 77.00 ppm  
BF 1.20 Hz  
RGAIN 26

C:\Documents and Settings\Administrator\Desktop\ヒドロエステル化NMR\ueda NMR\元のNMR\NMR-1\S9\S9-Hals  
TU-107-Recovery

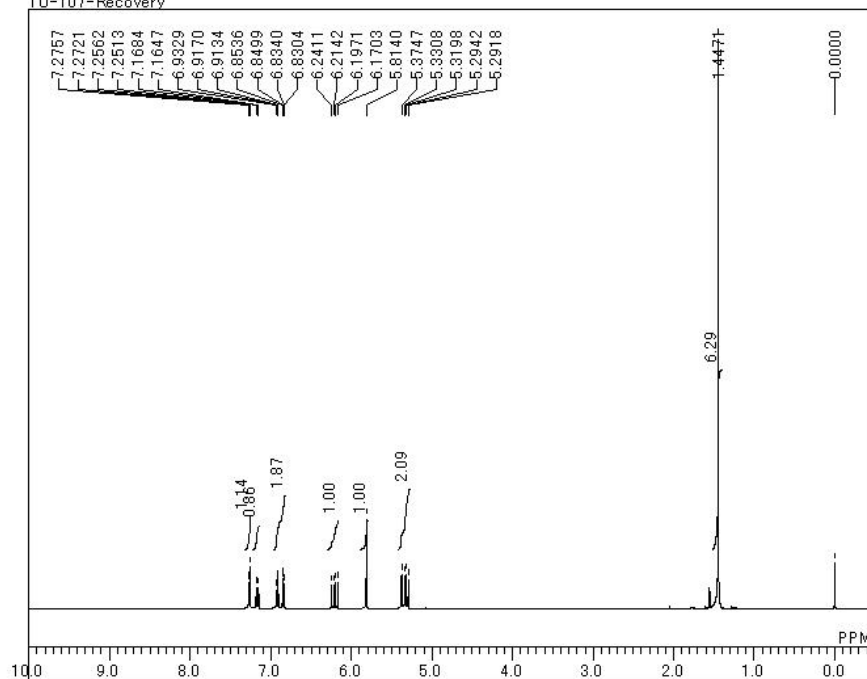

DFILE  
COMNT  
TU-107-Recovery  
DATIM  
Sat Nov 05 13:37:03 2011  
OBNUC  
1H  
EXMOD  
NON  
OBFRQ  
399.65 MHz  
OBSET  
124.00 KHz  
OBFIN  
10500.00 Hz  
POINT  
16384  
FREQU  
7992.01 Hz  
SCANS  
8  
ACQTM  
2.0500 sec  
PD  
4.9500 sec  
PW1  
6.20 usec  
IRNUG  
1H  
CTEMP  
24.2 c  
SLVNT  
CDCL3  
EXREF  
0.00 ppm  
BF  
0.12 Hz  
RGAIN  
13

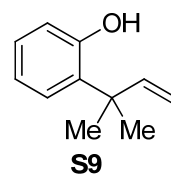

F:\NMR-1\5\TU-3411NON\_E1\_FT.als  
TU-341

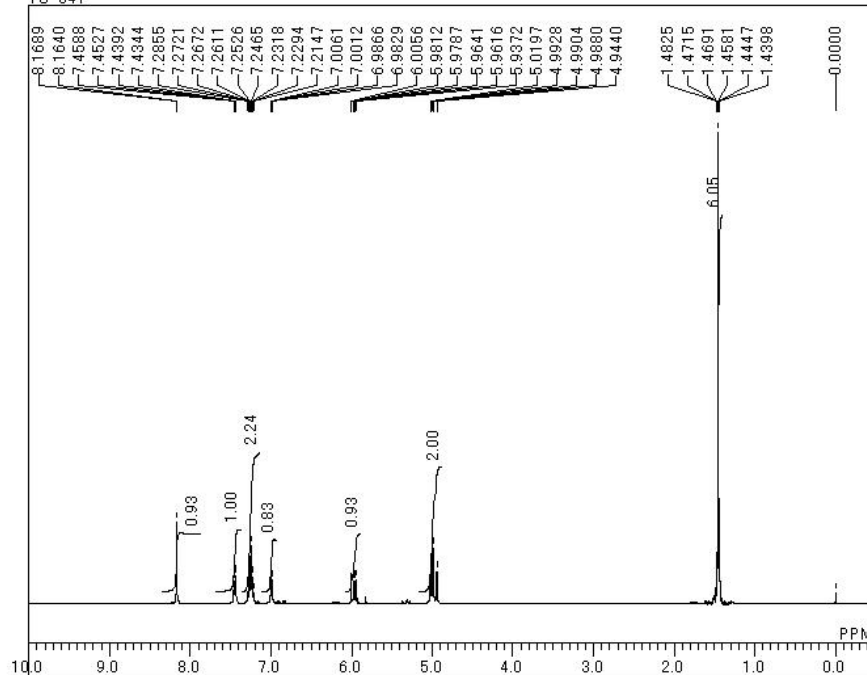

DFILE  
COMNT  
DATIM  
OBNUC  
EXMOD  
OBFRQ  
OBSET  
OBFIN  
POINT  
FREQU  
SCANS  
ACQTM  
PD  
PW1  
IRNUC  
CTEMP  
SLVNT  
EXREF  
BF  
RGAIN

F:\NMR-1\5\TU-3411NON\_...  
TU-341  
Sat Jan 28 09:38:16 2012  
1H  
NON  
399.65 MHz  
124.00 KHz  
10500.00 Hz  
16384  
7992.01 Hz  
8  
2.0500 sec  
4.9500 sec  
6.20 usec  
1H  
23.1 c  
CDCL3  
0.00 ppm  
0.12 Hz  
10

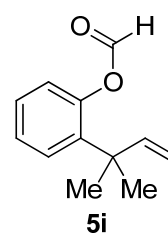

F:\NMR-1\5\TU-341-2-13C1BCM\_E4\_FT.als  
TU-341-2-13C

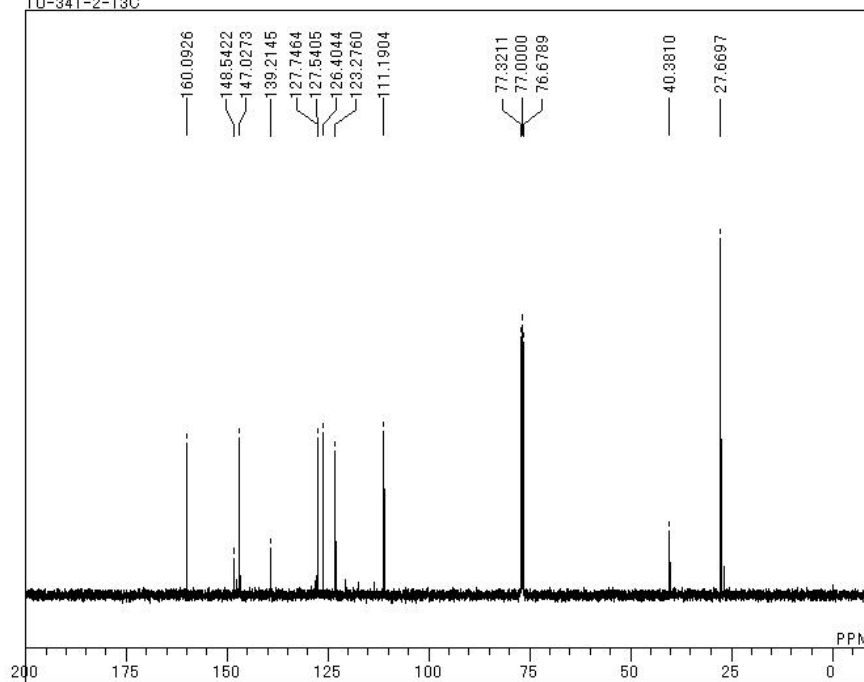

DFILE  
COMNT  
DATIM  
OBNUC  
EXMOD  
OBFRQ  
OBSET  
OBFIN  
POINT  
FREQU  
SCANS  
ACQTM  
PD  
PW1  
IRNUC  
CTEMP  
SLVNT  
EXREF  
BF  
RGAIN

F:\NMR-1\5\TU-341-2-13C...  
TU-341-2-13C  
Sat Jan 28 11:23:19 2012  
13C  
BCM  
100.40 MHz  
125.00 KHz  
10500.00 Hz  
32768  
27118.64 Hz  
128  
1.2083 sec  
1.7920 sec  
5.50 usec  
1H  
22.3 c  
CDCL3  
77.00 ppm  
1.20 Hz  
28



F:\NMR-1\5k-alcohol\TU-3541NON\_E14\_FT.als  
TU-354

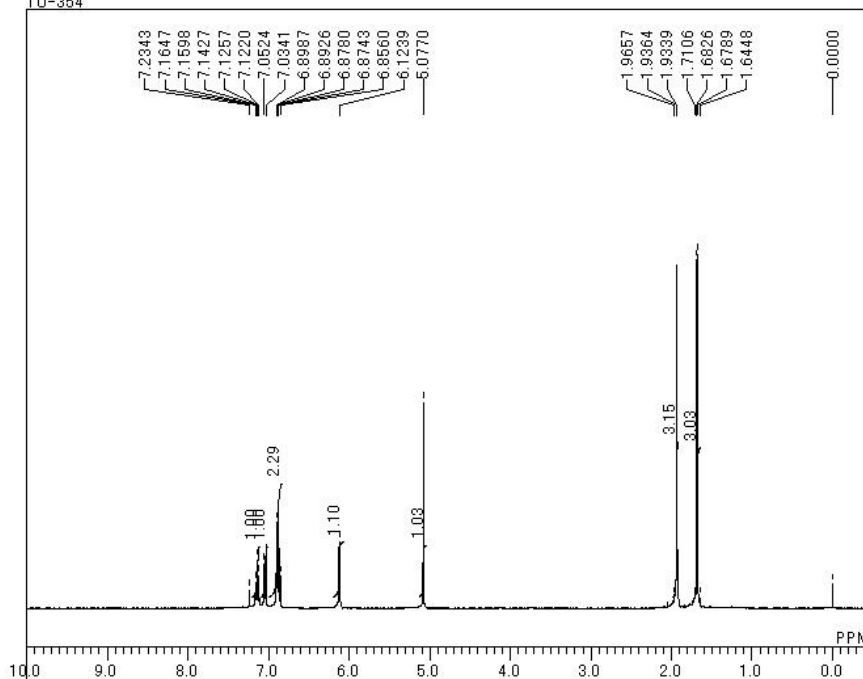

DFILE  
COMNT  
DATIM  
OBNUC  
EXMOD  
OBFRO  
OBSET  
OBFIN  
POINT  
FREQU  
SCANS  
ACQTM  
PD  
PW1  
IRNUC  
CTEMP  
SLVNT  
EXREF  
BF  
RGAIN

F:\NMR-1\5k-alcohol\TU-3541NON\_E14\_FT.als  
TU-354  
Tue Jan 31 11:29:14 2012  
1H  
NON  
399.65 MHz  
124.00 KHz  
10500.00 Hz  
16384  
7992.01 Hz  
8  
2.0500 sec  
4.9500 sec  
6.20 usec  
1H  
21.8 c  
CDCL3  
0.00 ppm  
0.12 Hz  
10

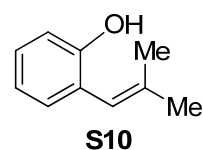

F:\NMR-1\5k-alcohol\TU-354-13C1BCM\_E16\_FT.als  
TU-354-13C

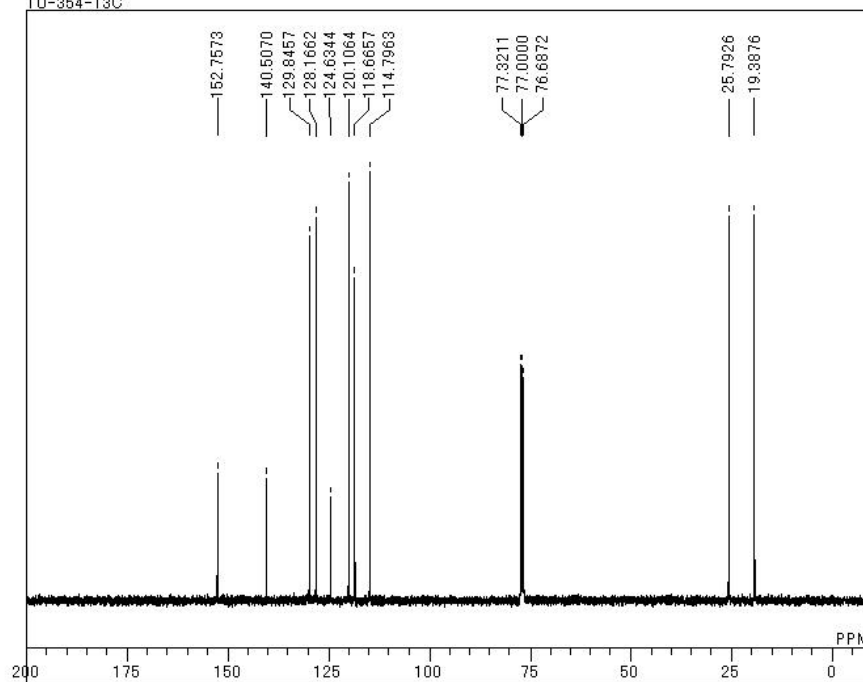

DFILE  
COMNT  
DATIM  
OBNUC  
EXMOD  
OBFRO  
OBSET  
OBFIN  
POINT  
FREQU  
SCANS  
ACQTM  
PD  
PW1  
IRNUC  
CTEMP  
SLVNT  
EXREF  
BF  
RGAIN

F:\NMR-1\5k-alcohol\TU-354-13C1BCM\_E16\_FT.als  
TU-354-13C  
Tue Jan 31 12:12:18 2012  
13C  
BCM  
100.40 MHz  
125.00 KHz  
10500.00 Hz  
32768  
27118.64 Hz  
256  
1.2083 sec  
1.7920 sec  
5.50 usec  
1H  
22.3 c  
CDCL3  
77.00 ppm  
1.20 Hz  
26

F:\NMR-1\5k\TU-3571NON\_E3\_FT.als  
TU-357

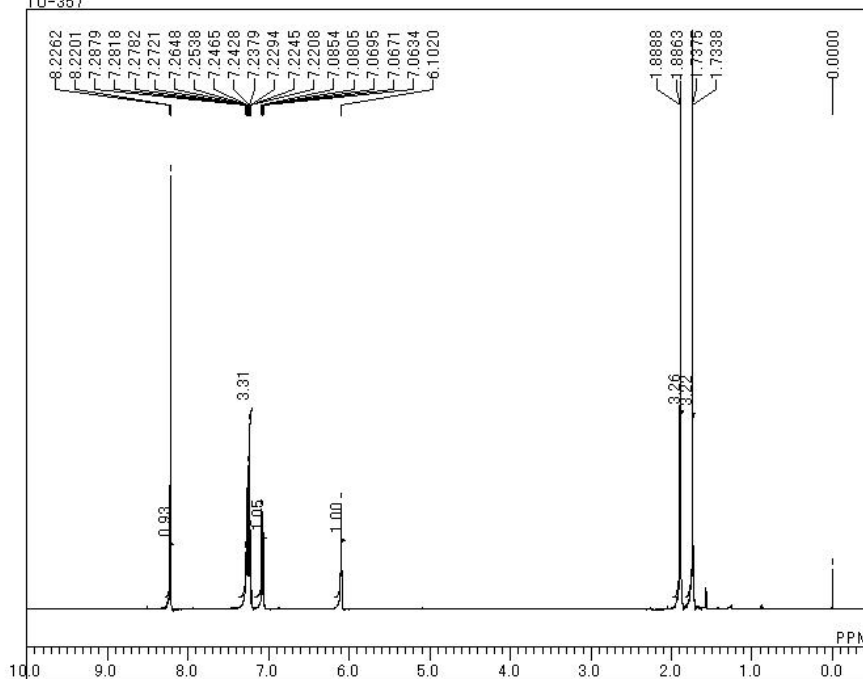

DFILE F:\NMR-1\5k\TU-3571NON  
COMNT TU-357  
DATIM Wed Feb 01 18:17:33 2012  
OBNUC 1H  
EXMOD NON  
OBFRQ 399.65 MHz  
OBSET 124.00 KHz  
OBFIN 10500.00 Hz  
POINT 16384  
FREQU 7992.01 Hz  
SCANS 8  
ACQTM 2.0500 sec  
PD 4.9500 sec  
PW1 6.20 usec  
IRNUC 1H  
CTEMP 23.1 c  
SLVNT CDCL3  
EXREF 0.00 ppm  
BF 0.12 Hz  
RGAIN 9

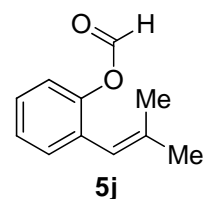

F:\NMR-1\5k\TU-357-13C1BCM\_E4\_FT.als  
TU-357-13C

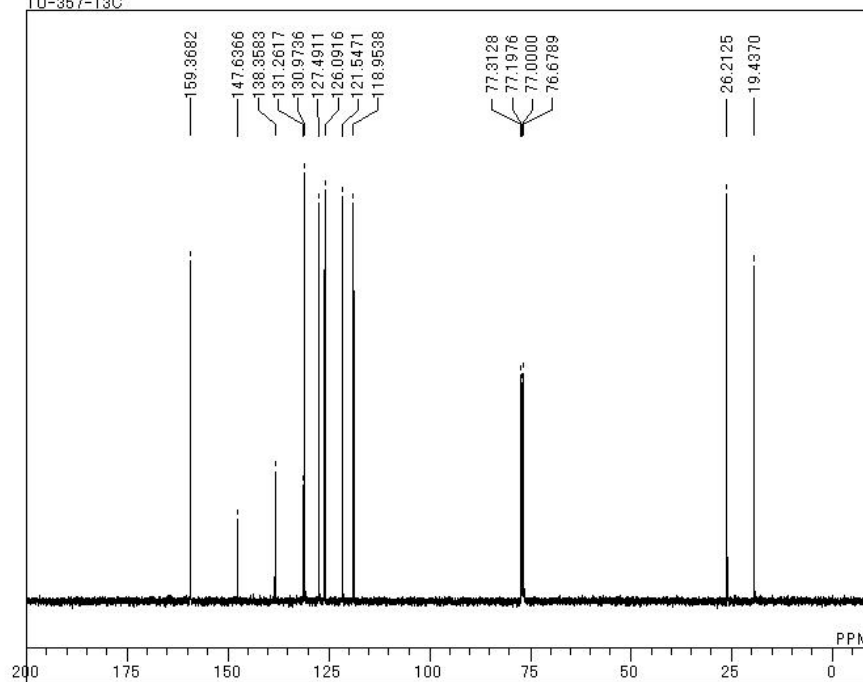

DFILE F:\NMR-1\5k\TU-357-13C1  
COMNT TU-357-13C  
DATIM Wed Feb 01 18:35:01 2012  
OBNUC 13C  
EXMOD BCM  
OBFRQ 100.40 MHz  
OBSET 125.00 KHz  
OBFIN 10500.00 Hz  
POINT 32768  
FREQU 27118.64 Hz  
SCANS 256  
ACQTM 1.2083 sec  
PD 1.7920 sec  
PW1 5.50 usec  
IRNUC 1H  
CTEMP 23.0 c  
SLVNT CDCL3  
EXREF 77.00 ppm  
BF 1.20 Hz  
RGAIN 26

C:\Documents and Settings\Administrator\Desktop\ヒドロエステル化NMR\ueda NMR\元のNMR\NMR-1\S13\S13-Hals  
TU-213-2

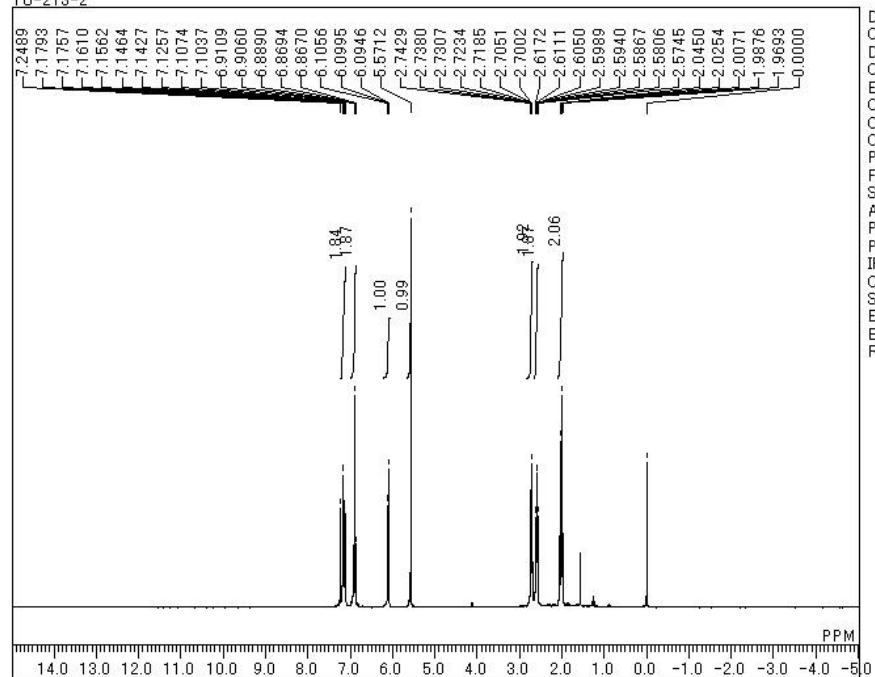

DFILE  
COMNT  
TU-213-2  
DATIM  
Sat Dec 10 15:10:16 2011  
OBNUC  
1H  
EXMOD  
NON  
OBFRQ  
399.65 MHz  
OBSET  
124.00 KHz  
OBFIN  
10500.00 Hz  
POINT  
16384  
FREQU  
7992.01 Hz  
SCANS  
8  
ACQTM  
2.0500 sec  
PD  
4.9500 sec  
PW1  
6.20 usec  
IRNUG  
1H  
CTEMP  
24.5 c  
SLVNT  
CDCL3  
EXREF  
0.00 ppm  
BF  
0.12 Hz  
RGAIN  
14

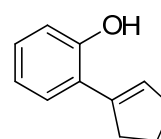

**S11**

F:\NMR-1\5#TU-2221NON\_E4\_FT.als  
TU-222

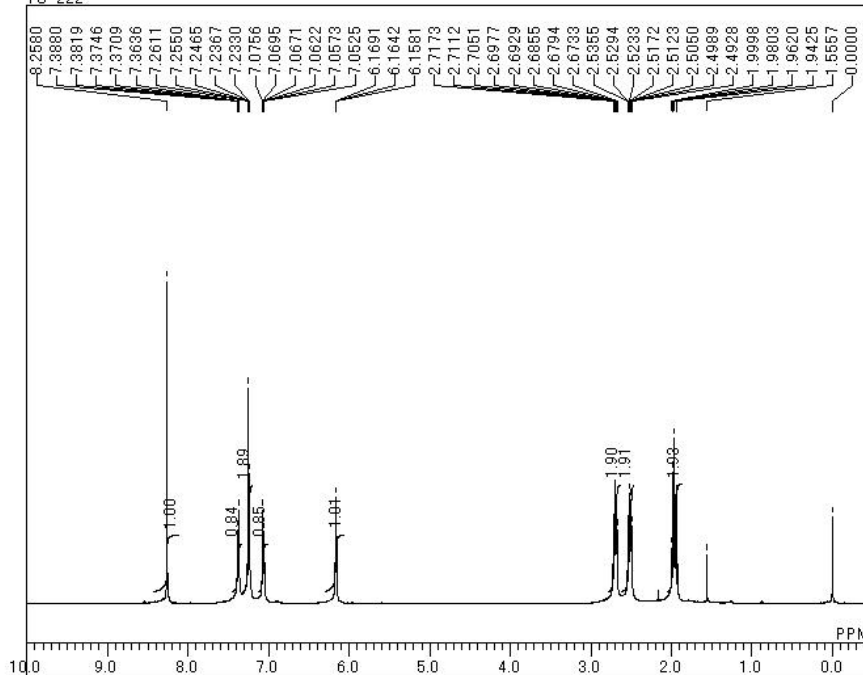

DFILE F:\NMR-1\5#TU-2221NON\_  
COMNT TU-222  
DATIM Mon Dec 12 23:17:21 2011  
OBNUC 1H  
EXMOD NON  
OBFRQ 399.65 MHz  
OBSET 124.00 KHz  
OBFIN 10500.00 Hz  
POINT 16384  
FREQU 7992.01 Hz  
SCANS 8  
ACQTM 2.0500 sec  
PD 4.9500 sec  
PW1 6.20 usec  
IRNUC 1H  
CTEMP 22.8 c  
SLVNT CDCL3  
EXREF 0.00 ppm  
BF 0.12 Hz  
RGAIN 13

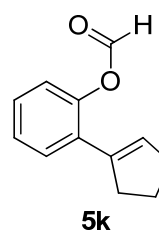

F:\NMR-1\5#TU-222-13C-1.jdf  
TU-222-13C

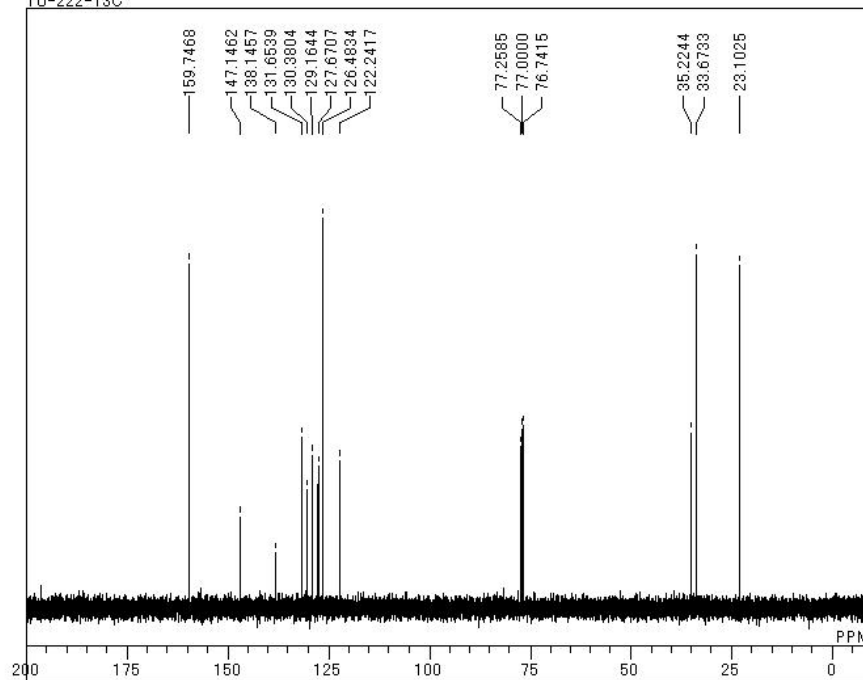

DFILE F:\NMR-1\5#TU-222-13C-  
COMNT TU-222-13C  
DATIM 17-01-2012 21:59:42  
OBNUC 13C  
EXMOD single\_pulse\_dec  
OBFRQ 124.51 MHz  
OBSET 3.45 KHz  
OBFIN 6.00 Hz  
POINT 32768  
FREQU 39062.50 Hz  
SCANS 64  
ACQTM 0.8389 sec  
PD 1.5000 sec  
PW1 5.57 usec  
IRNUC 1H  
CTEMP 21.4 c  
SLVNT CDCL3  
EXREF 77.00 ppm  
BF 0.12 Hz  
RGAIN 50

F:\NMR\TU-2421NON\_E4.als  
TU-242

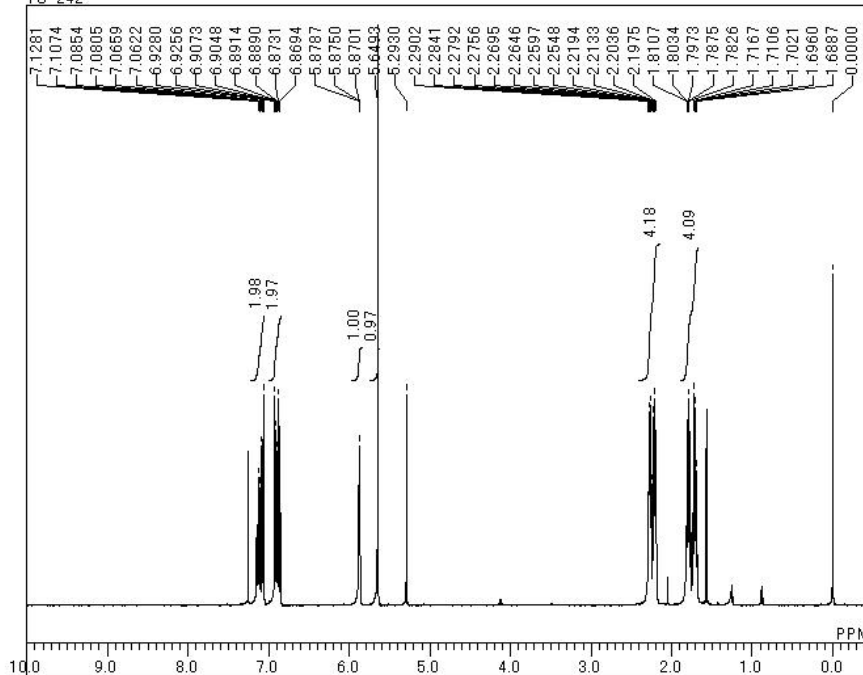

DFILE F:\NMR\TU-2421NON\_E4.als  
COMNT TU-242  
DATIM Mon Dec 19 21:29:16 2011  
OBNUC 1H  
EXMOD NON  
OBFRQ 399.65 MHz  
OBSET 124.00 KHz  
OBFIN 10500.00 Hz  
POINT 16384  
FREQU 7992.01 Hz  
SCANS 8  
ACQTM 2.0500 sec  
PD 4.9500 sec  
PW1 6.20 usec  
IRNUC 1H  
CTEMP 21.4 c  
SLVNT CDCL3  
EXREF 0.00 ppm  
BF 0.12 Hz  
RGAIN 14

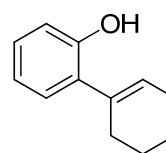

**S12**

F:\NMR-1\5m#TU-2441NON\_E17\_FT.als  
TU-244

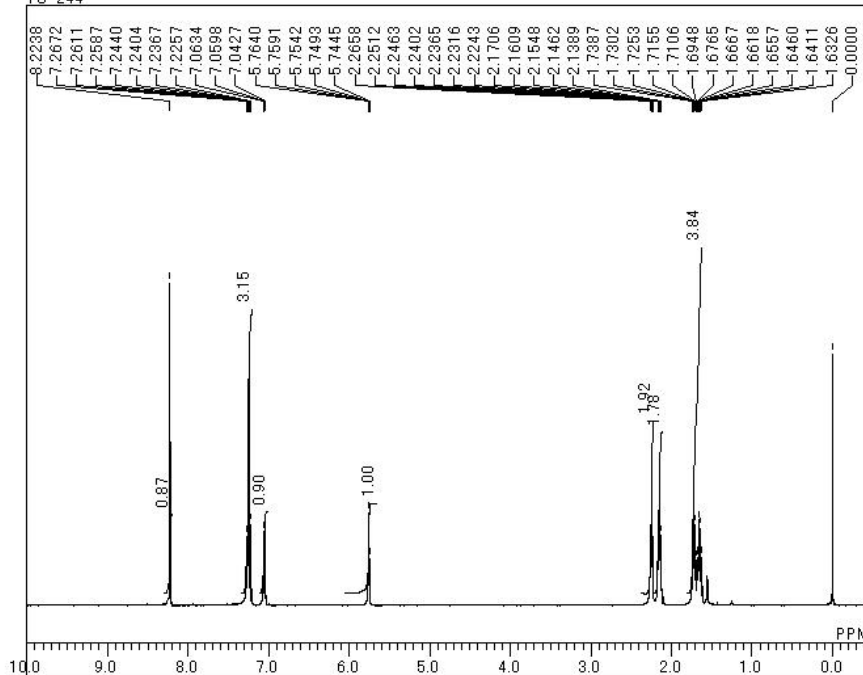

DFILE F:\NMR-1\5m#TU-2441NON  
COMNT TU-244  
DATIM Tue Dec 20 20:31:46 2011  
OBNUC 1H  
EXMOD NON  
OBFRQ 399.65 MHz  
OBSET 124.00 KHz  
OBFIN 10500.00 Hz  
POINT 16384  
FREQU 7992.01 Hz  
SCANS 8  
ACQTM 2.0500 sec  
PD 4.9500 sec  
PW1 6.20 usec  
IRNUC 1H  
CTEMP 22.5 c  
SLVNT CDCL3  
EXREF 0.00 ppm  
BF 0.12 Hz  
RGAIN 15

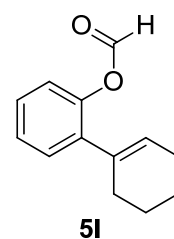

F:\NMR-1\5m#TU-244-13C-1.jdf  
TU-244-13C

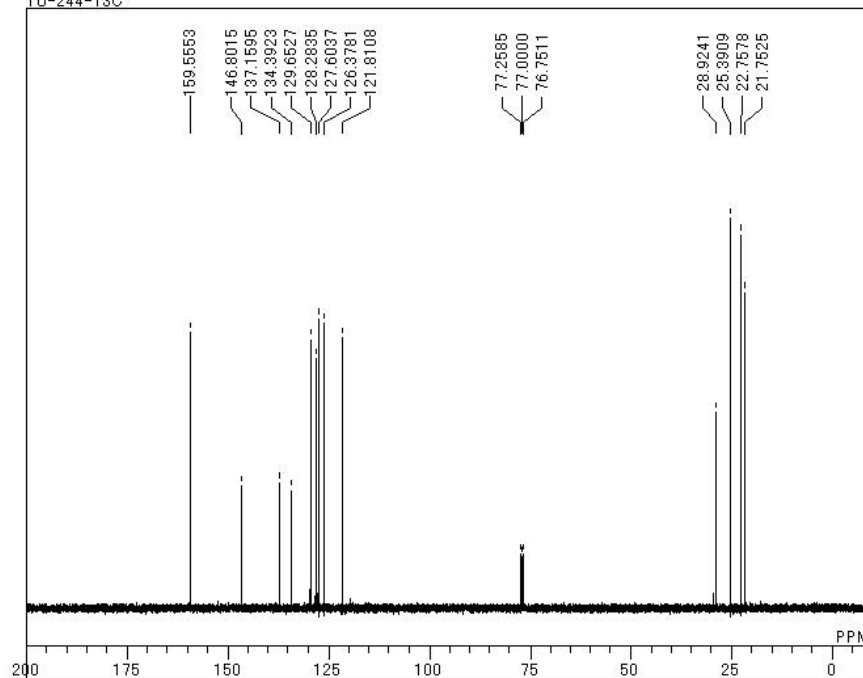

DFILE F:\NMR-1\5m#TU-244-13C-  
COMNT TU-244-13C  
DATIM 17-01-2012 22:13:01  
OBNUC 13C  
EXMOD single\_pulse\_dec  
OBFRQ 124.51 MHz  
OBSET 3.45 KHz  
OBFIN 6.00 Hz  
POINT 32768  
FREQU 39062.50 Hz  
SCANS 64  
ACQTM 0.8389 sec  
PD 1.5000 sec  
PW1 5.57 usec  
IRNUC 1H  
CTEMP 21.5 c  
SLVNT CDCL3  
EXREF 77.00 ppm  
BF 0.12 Hz  
RGAIN 50

F:\NMR\TM-170-120116-11NON\_E4.als  
TM-170-120116-1

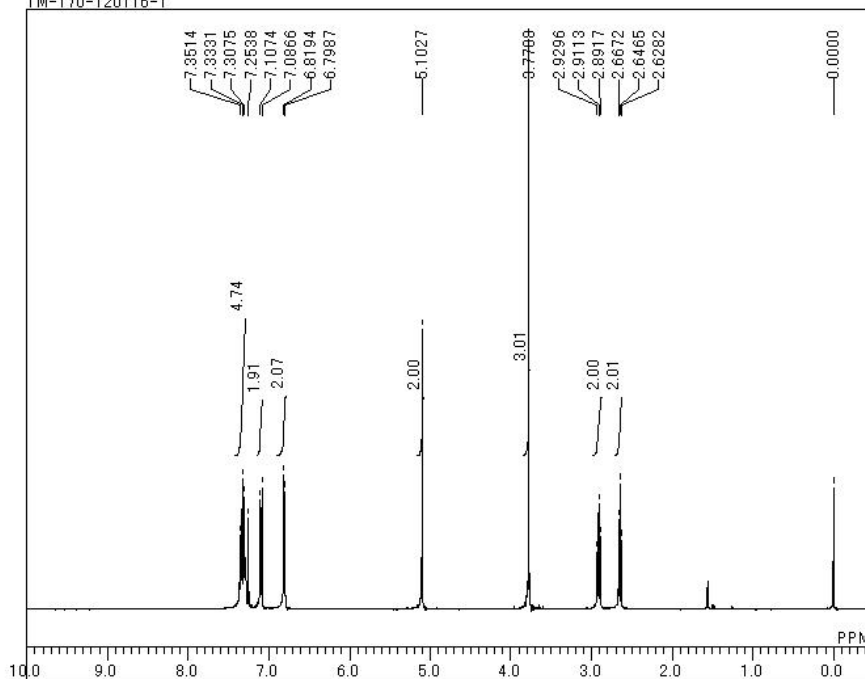

DFILE  
COMNT  
DATIM  
OBNUC  
EXMOD  
OBFRQ  
OBSET  
OBFIN  
POINT  
FREQU  
SCANS  
ACQTM  
PD  
PW1  
IRNUC  
CTEMP  
SLVNT  
EXREF  
BF  
RGAIN

F:\NMR\TM-170-120116-11  
TM-170-120116-1  
Mon Jan 16 14:38:14 2012  
1H  
NON  
399.65 MHz  
124.00 KHz  
10500.00 Hz  
16384  
7992.01 Hz  
8  
2.0500 sec  
4.9500 sec  
6.20 usec  
1H  
22.9 c  
CDCL3  
0.00 ppm  
0.12 Hz  
16

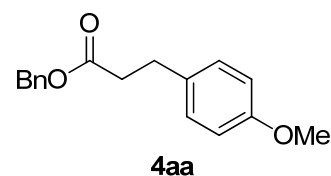

F:\NMR\TM-170-120201-C1BCM\_E5.als  
TM-170-120201-C

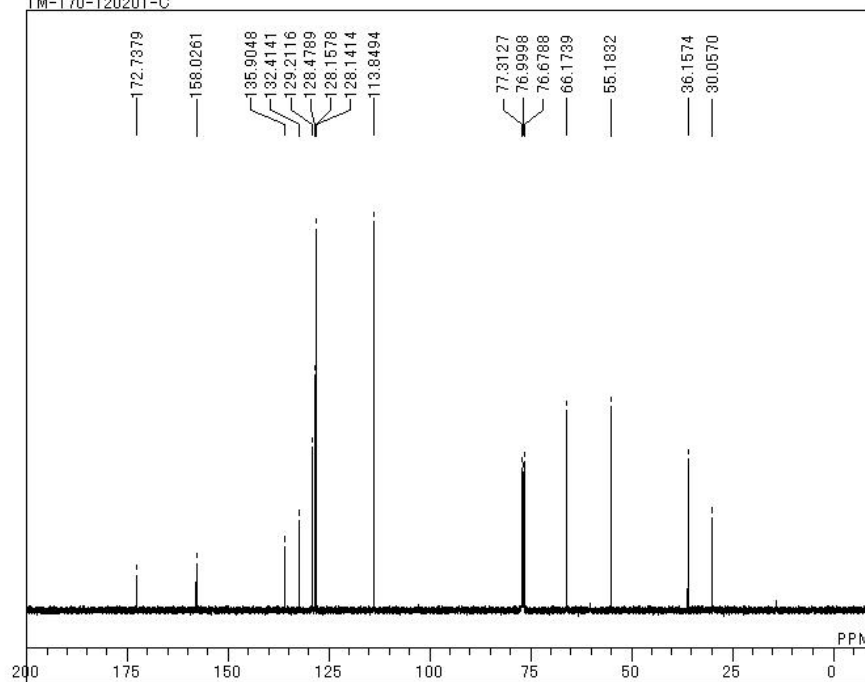

DFILE  
COMNT  
DATIM  
OBNUC  
EXMOD  
OBFRQ  
OBSET  
OBFIN  
POINT  
FREQU  
SCANS  
ACQTM  
PD  
PW1  
IRNUC  
CTEMP  
SLVNT  
EXREF  
BF  
RGAIN

F:\NMR\TM-170-120201-C1  
TM-170-120201-C  
Wed Feb 01 15:00:38 2012  
13C  
BCM  
100.40 MHz  
125.00 KHz  
10500.00 Hz  
32768  
27118.64 Hz  
512  
1.2083 sec  
1.7920 sec  
5.50 usec  
1H  
22.5 c  
CDCL3  
30.06 ppm  
0.12 Hz  
26

F:\NMR\TM-120207-11NON\_E13.als  
branched

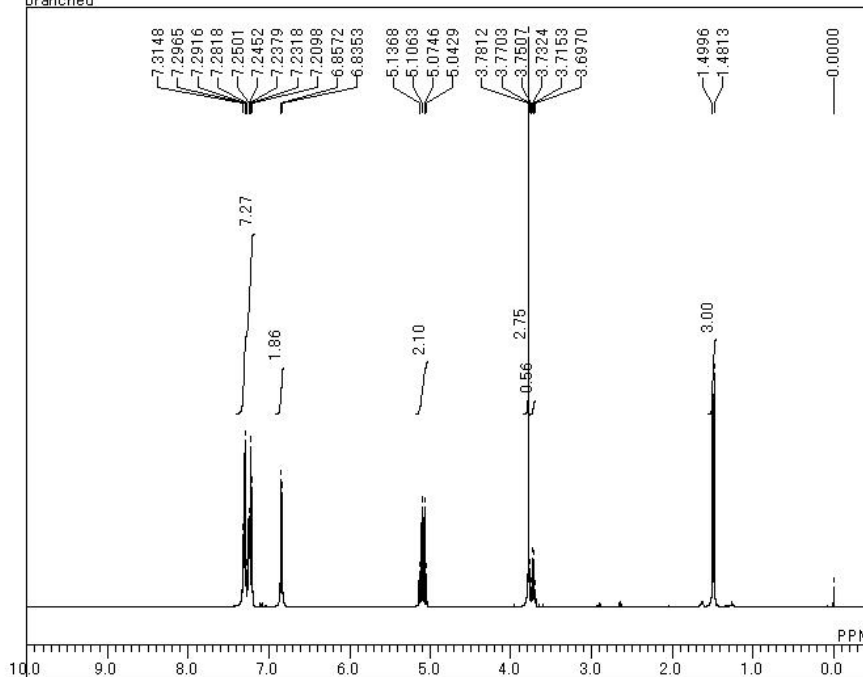

DFILE F:\NMR\TM-120207-11NON  
COMNT branched  
DATIM Tue Feb 07 15:18:17 2012  
OBNUC 1H  
EXMOD NON  
OBFRQ 399.65 MHz  
OBSET 124.00 KHz  
OBFIN 10500.00 Hz  
POINT 16384  
FREQU 7992.01 Hz  
SCANS 8  
ACQTM 2.0500 sec  
PD 4.9500 sec  
PW1 6.20 usec  
IRNUC 1H  
CTEMP 19.2 c  
SLVNT CDCL3  
EXREF 0.00 ppm  
BF 0.12 Hz  
RGAIN 10

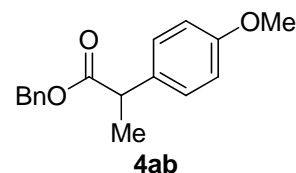

F:\NMR\TM-120207-21BCM\_E6.als  
branched-C

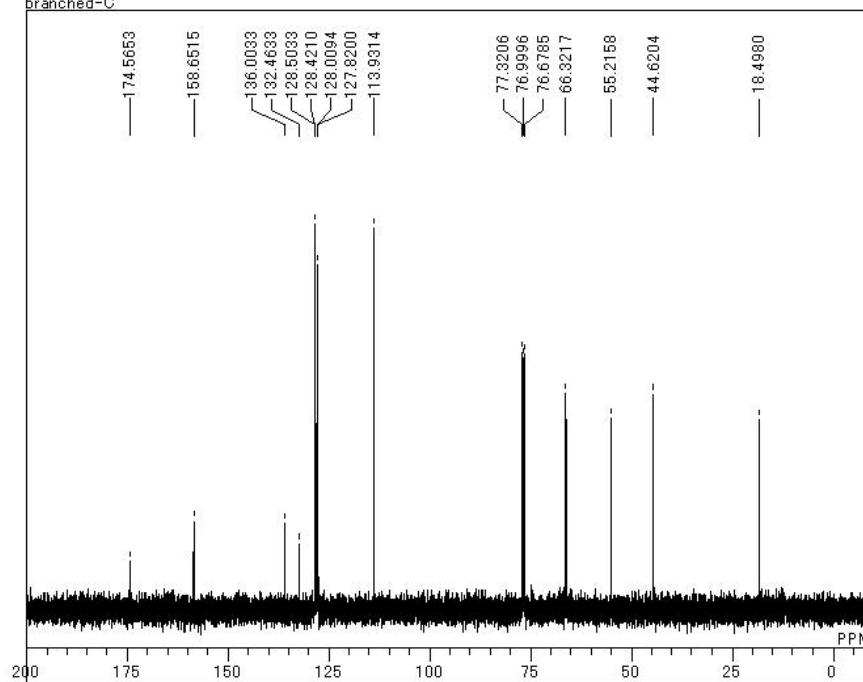

DFILE F:\NMR\TM-120207-21BCM  
COMNT branched-C  
DATIM Tue Feb 07 18:33:21 2012  
OBNUC 13C  
EXMOD BCM  
OBFRQ 100.40 MHz  
OBSET 125.00 KHz  
OBFIN 10500.00 Hz  
POINT 32768  
FREQU 27118.64 Hz  
SCANS 512  
ACQTM 1.2083 sec  
PD 1.7920 sec  
PW1 5.50 usec  
IRNUC 1H  
CTEMP 21.1 c  
SLVNT CDCL3  
EXREF 18.50 ppm  
BF 0.12 Hz  
RGAIN 22



H-1NMR#NewCompound#HK-454-1NON\_E5.als  
HK-454

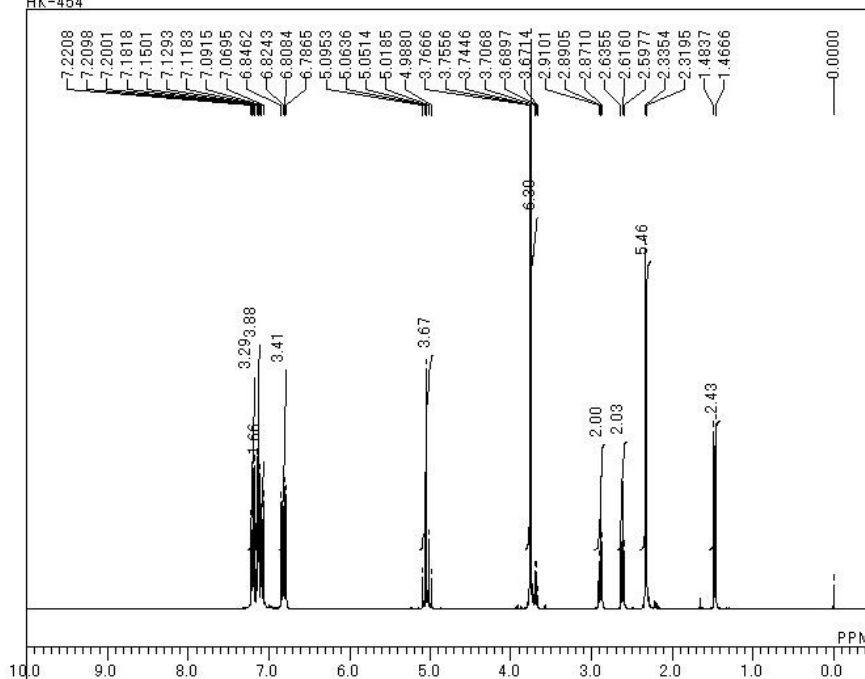

DFILE  
COMNT  
DATIM  
OBNUC  
EXMOD  
OBFRQ  
OBSET  
OBFIN  
POINT  
FREQU  
SCANS  
ACQTM  
PD  
PW1  
IRNUC  
CTEMP  
SLVNT  
EXREF  
BF  
RGAIN

H-1NMR#NewCompound#HK-  
HK-454  
Tue Jan 24 23:55:33 2012  
1H  
NON  
399.65 MHz  
124.00 KHz  
10500.00 Hz  
16384  
7992.01 Hz  
8  
2.0500 sec  
4.9500 sec  
6.20 usec  
1H  
21.3 c  
CDCL3  
0.00 ppm  
0.12 Hz  
8

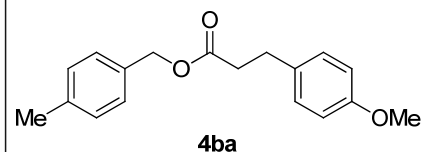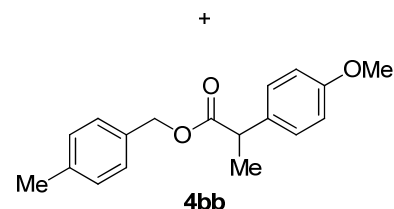

H-1NMR#NewCompound#HK-454-C1BCM\_E10.als  
HK-454

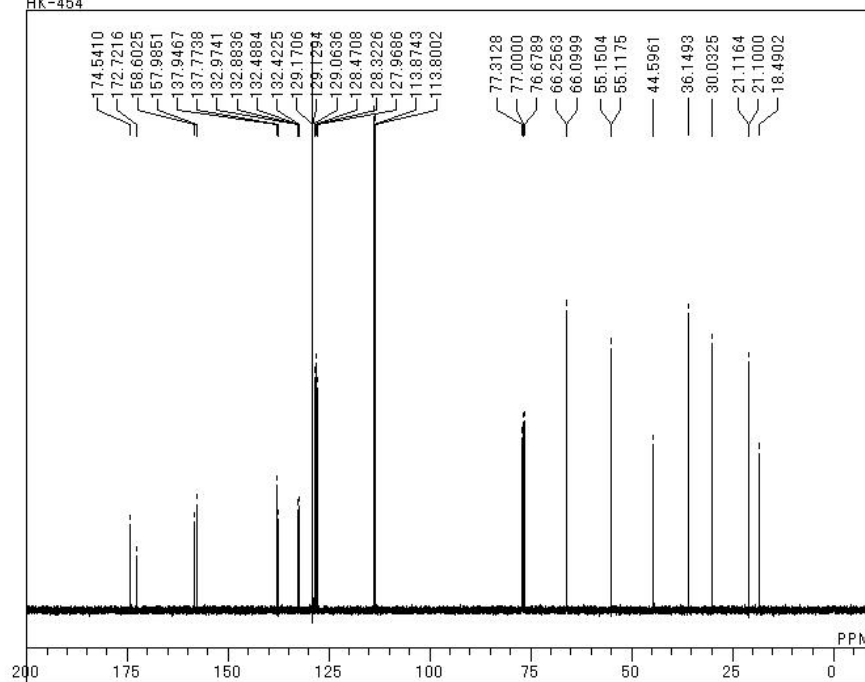

DFILE  
COMNT  
DATIM  
OBNUC  
EXMOD  
OBFRQ  
OBSET  
OBFIN  
POINT  
FREQU  
SCANS  
ACQTM  
PD  
PW1  
IRNUC  
CTEMP  
SLVNT  
EXREF  
BF  
RGAIN

H-1NMR#NewCompound#HK-  
HK-454  
Wed Jan 25 01:29:58 2012  
13C  
BCM  
100.40 MHz  
125.00 KHz  
10500.00 Hz  
32768  
27118.64 Hz  
256  
1.2083 sec  
1.7920 sec  
5.50 usec  
1H  
22.1 c  
CDCL3  
77.00 ppm  
0.12 Hz  
26

H:\NMR\NewCompound\HK-453-Shita1NON\_E4.als  
HK-453-Shita

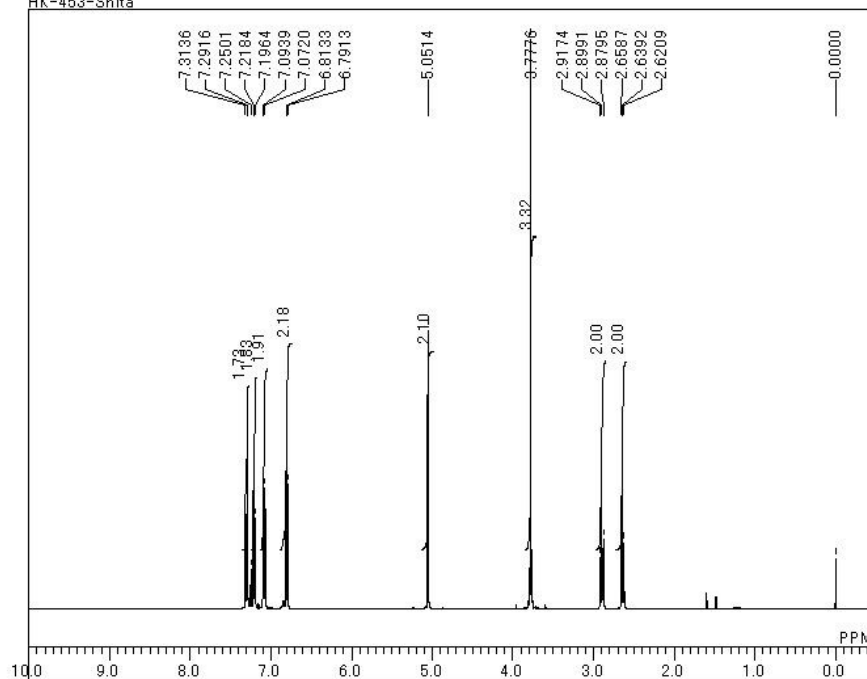

DFILE  
COMNT  
DATIM  
OBNUC  
EXMOD  
OBFRO  
OBSET  
OBFIN  
POINT  
FREQU  
SCANS  
ACQTM  
PD  
PW1  
IRNUC  
CTEMP  
SLVNT  
EXREF  
BF  
RGAIN

H:\NMR\NewCompound\HK-  
HK-453-Shita  
Tue Jan 24 23:50:19 2012  
1H  
NON  
399.65 MHz  
124.00 KHz  
10500.00 Hz  
16384  
7992.01 Hz  
8  
2.0500 sec  
4.9500 sec  
6.20 usec  
1H  
21.4 c  
CDCL3  
0.00 ppm  
0.12 Hz  
12

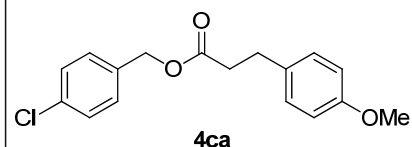

H:\NMR\NewCompound\HK-453-Shita-C1BCM\_E9.als  
HK-453-Shita

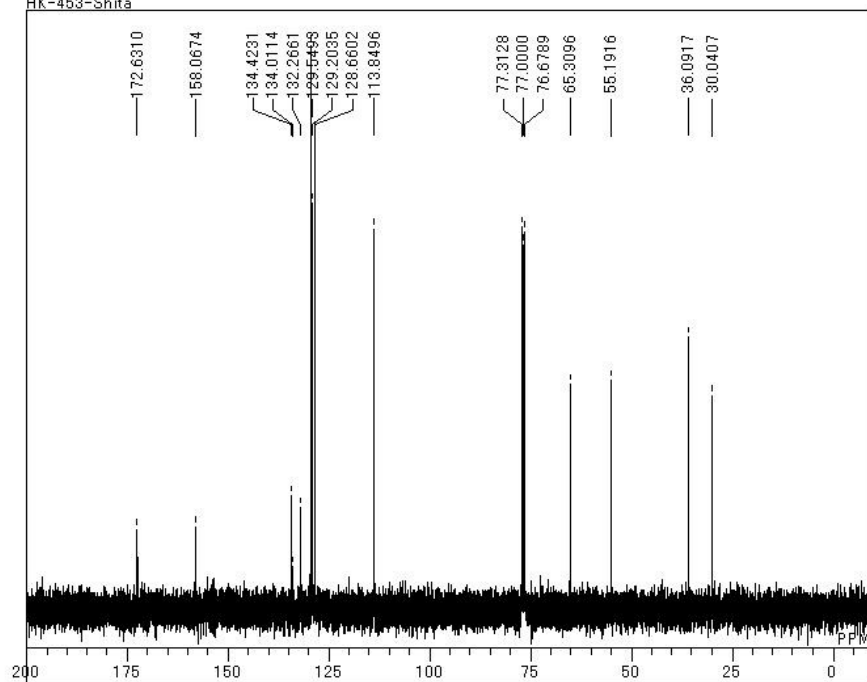

DFILE  
COMNT  
DATIM  
OBNUC  
EXMOD  
OBFRO  
OBSET  
OBFIN  
POINT  
FREQU  
SCANS  
ACQTM  
PD  
PW1  
IRNUC  
CTEMP  
SLVNT  
EXREF  
BF  
RGAIN

H:\NMR\NewCompound\HK-  
HK-453-Shita  
Wed Jan 25 01:10:35 2012  
13C  
BCM  
100.40 MHz  
125.00 KHz  
10500.00 Hz  
32768  
27118.64 Hz  
256  
1.2083 sec  
1.7920 sec  
5.50 usec  
1H  
22.1 c  
CDCL3  
77.00 ppm  
0.12 Hz  
26

H:NMR#NewCompound#HK-453-Ue1NON\_E3.als  
HK-453-Ue

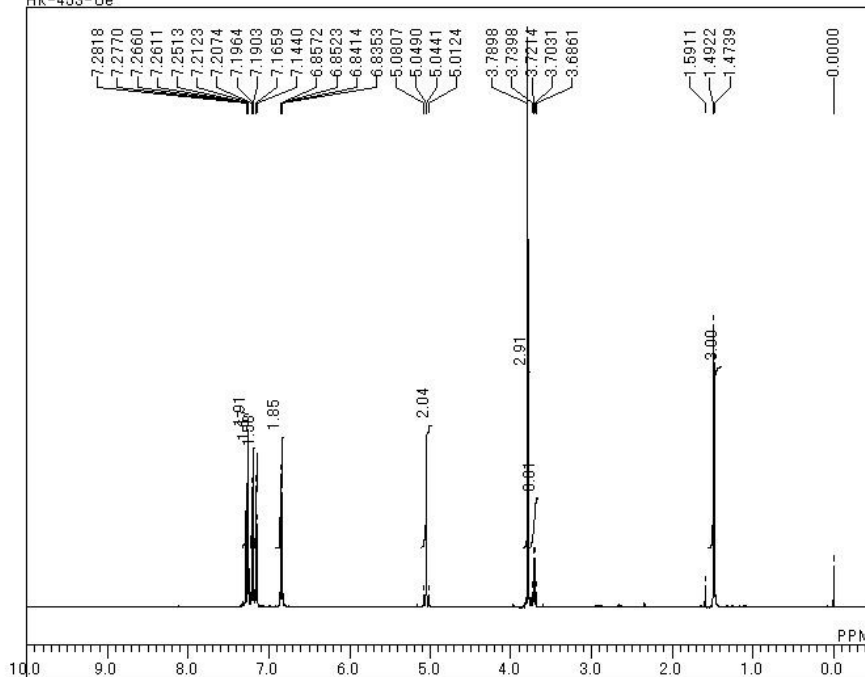

DFILE  
COMNT  
DATIM  
OBNUC  
EXMOD  
OBFRO  
OBSET  
OBFIN  
POINT  
FREQU  
SCANS  
ACQTM  
PD  
PW1  
IRNUC  
CTEMP  
SLVNT  
EXREF  
BF  
RGAIN

H:NMR#NewCompound#HK-453-Ue  
Tue Jan 24 23:43:42 2012  
1H  
NON  
399.65 MHz  
124.00 KHz  
10500.00 Hz  
16384  
7992.01 Hz  
8  
2.0500 sec  
4.9500 sec  
6.20 usec  
1H  
21.4 c  
CDCL3  
0.00 ppm  
0.12 Hz  
12

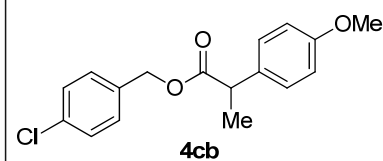

H:NMR#NewCompound#HK-453-Ue-C1BCM\_E8.als  
HK-453-Ue

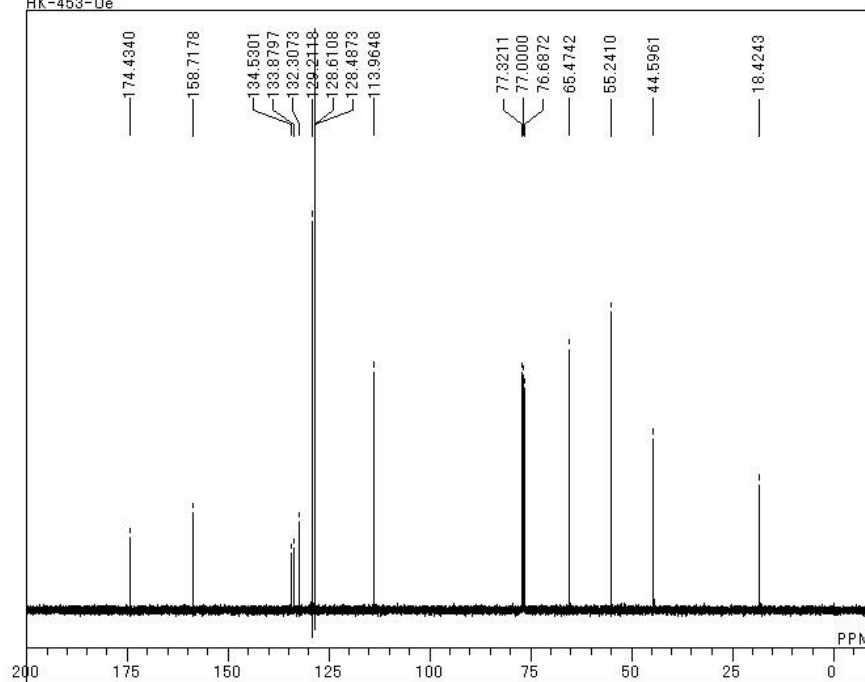

DFILE  
COMNT  
DATIM  
OBNUC  
EXMOD  
OBFRO  
OBSET  
OBFIN  
POINT  
FREQU  
SCANS  
ACQTM  
PD  
PW1  
IRNUC  
CTEMP  
SLVNT  
EXREF  
BF  
RGAIN

H:NMR#NewCompound#HK-453-Ue  
Wed Jan 25 00:50:50 2012  
13C  
BCM  
100.40 MHz  
125.00 KHz  
10500.00 Hz  
32768  
27118.64 Hz  
256  
1.2083 sec  
1.7920 sec  
5.50 usec  
1H  
22.1 c  
CDCL3  
77.00 ppm  
0.12 Hz  
26

H-1NMR#NewCompound#HK-447-1NON\_E3.als  
HK-447

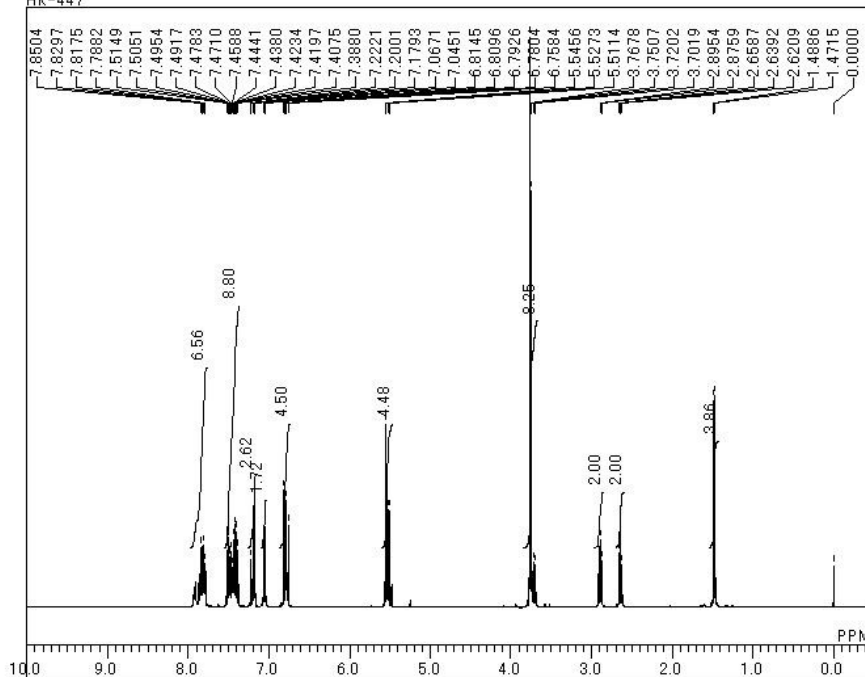

DFILE  
COMNT  
DATIM  
OBNUC  
EXMOD  
OBFRQ  
OBSET  
OBFIN  
POINT  
FREQU  
SCANS  
ACQTM  
PD  
PW1  
IRNUC  
CTEMP  
SLVNT  
EXREF  
BF  
RGAIN

H-1NMR#NewCompound#HK-  
HK-447  
Wed Jan 25 23:21:12 2012  
1H  
NON  
399.65 MHz  
124.00 KHz  
10500.00 Hz  
16384  
7992.01 Hz  
8  
2.0500 sec  
4.9500 sec  
6.20 usec  
1H  
21.8 c  
CDCL3  
0.00 ppm  
0.12 Hz  
10

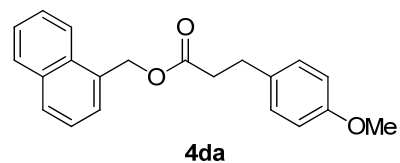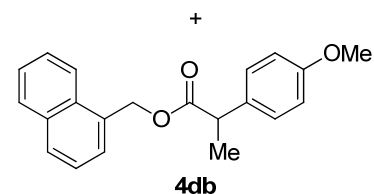

H-1NMR#NewCompound#HK-447-C1BCM\_E6.als  
HK-447

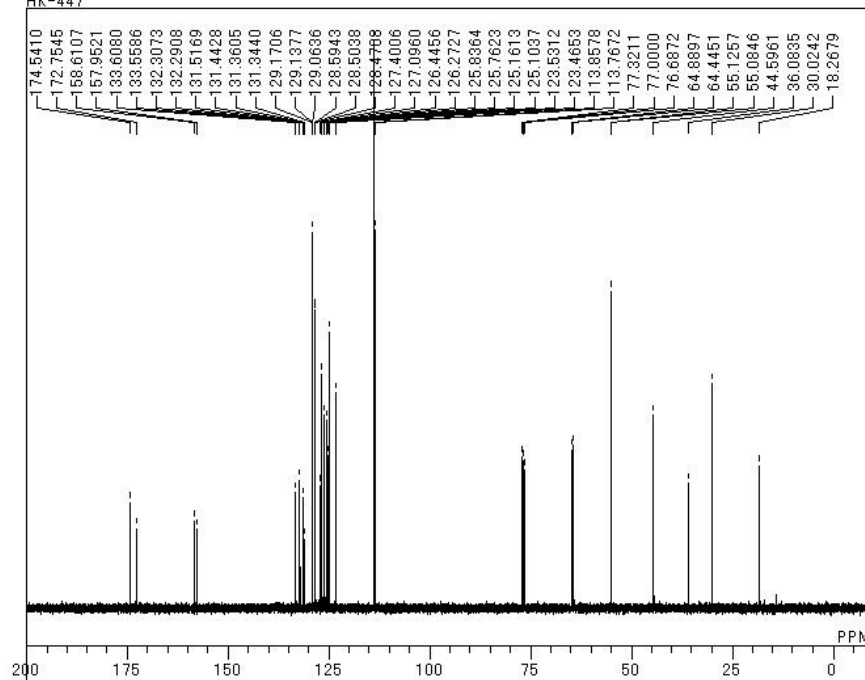

DFILE  
COMNT  
DATIM  
OBNUC  
EXMOD  
OBFRQ  
OBSET  
OBFIN  
POINT  
FREQU  
SCANS  
ACQTM  
PD  
PW1  
IRNUC  
CTEMP  
SLVNT  
EXREF  
BF  
RGAIN

H-1NMR#NewCompound#HK-  
HK-447  
Wed Jan 25 00:14:51 2012  
13C  
BCM  
100.40 MHz  
125.00 KHz  
10500.00 Hz  
32768  
27118.64 Hz  
256  
1.2083 sec  
1.7920 sec  
5.50 usec  
1H  
22.3 c  
CDCL3  
77.00 ppm  
0.12 Hz  
26

F:\NMR\TM-120119-11NON\_E26.als  
phenyl

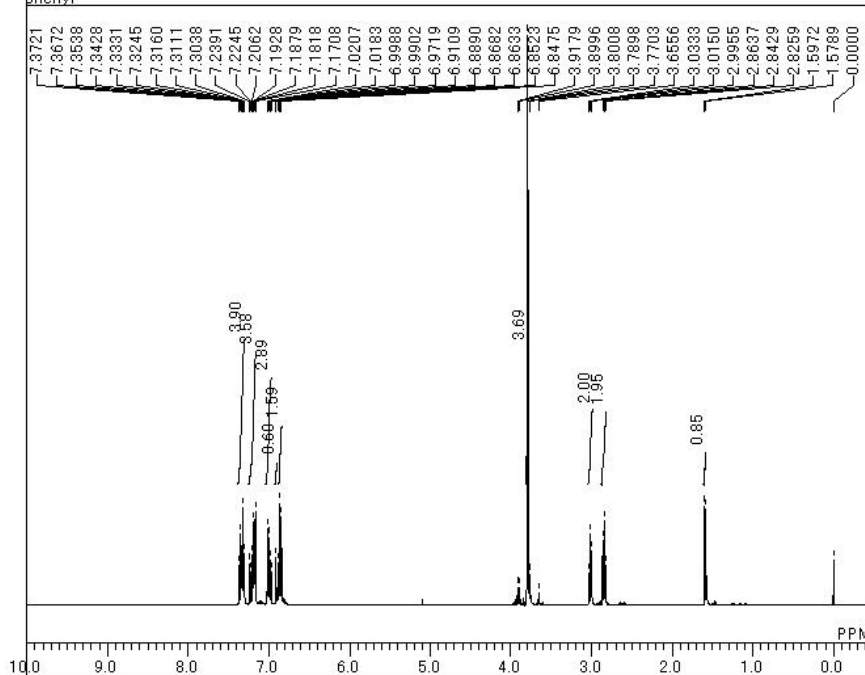

DFILE F:\NMR\TM-120119-11NON  
COMNT phenyl  
DATIM Thu Jan 19 15:10:27 2012  
OBNUC 1H  
EXMOD NON  
OBFRQ 399.65 MHz  
OBSET 124.00 KHz  
OBFIN 10500.00 Hz  
POINT 16384  
FREQU 7992.01 Hz  
SCANS 8  
ACQTM 2.0500 sec  
PD 4.9500 sec  
PW1 6.20 usec  
IRNUC 1H  
CTEMP 22.0 c  
SLVNT CDCL3  
EXREF 0.00 ppm  
BF 0.12 Hz  
RGAIN 12

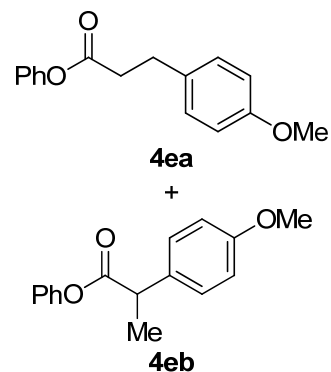

F:\NMR\phenyl products.1  
phenyl products

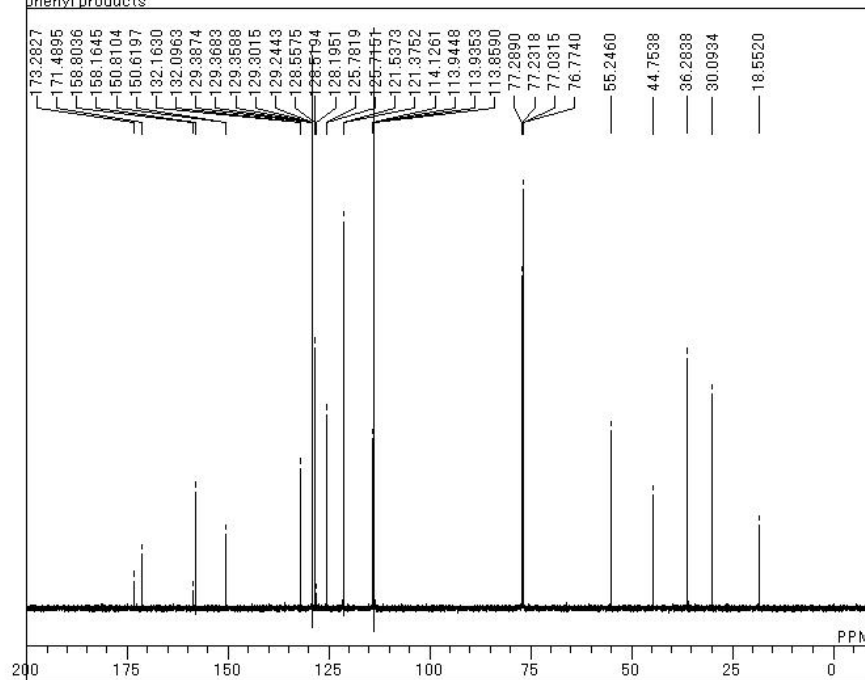

DFILE F:\NMR\phenyl products.1  
COMNT phenyl products  
DATIM 20-01-2012 16:41:24  
OBNUC 13C  
EXMOD single\_pulse\_dec  
OBFRQ 125.77 MHz  
OBSET 7.87 KHz  
OBFIN 4.21 Hz  
POINT 32768  
FREQU 39308.18 Hz  
SCANS 1000  
ACQTM 0.8336 sec  
PD 1.5000 sec  
PW1 3.33 usec  
IRNUC 1H  
CTEMP 19.6 c  
SLVNT CDCL3  
EXREF 0.00 ppm  
BF 0.12 Hz  
RGAIN 58

H-1NMR#NewCompound#HK-448-1NON\_E2.als  
HK-448

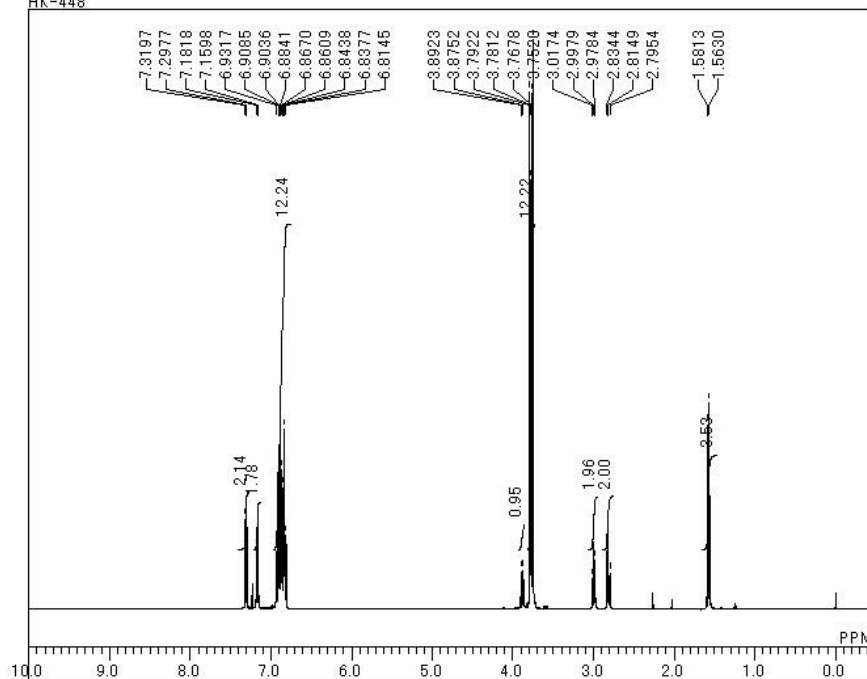

DFILE  
COMNT  
DATIM  
OBNUC  
EXMOD  
OBFRQ  
OBSET  
OBFIN  
POINT  
FREQU  
SCANS  
ACQTM  
PD  
PW1  
IRNUC  
CTEMP  
SLVNT  
EXREF  
BF  
RGAIN

H-1NMR#NewCompound#HK-  
HK-448  
Tue Jan 24 23:35:44 2012  
1H  
NON  
399.65 MHz  
124.00 KHz  
10500.00 Hz  
16384  
7992.01 Hz  
8  
2.0500 sec  
4.9500 sec  
6.20 usec  
1H  
21.5 c  
CDCL3  
0.00 ppm  
0.12 Hz  
9

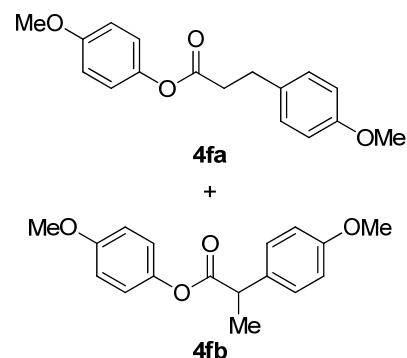

H-1NMR#NewCompound#HK-448-C1BCM\_E7.als  
HK-448

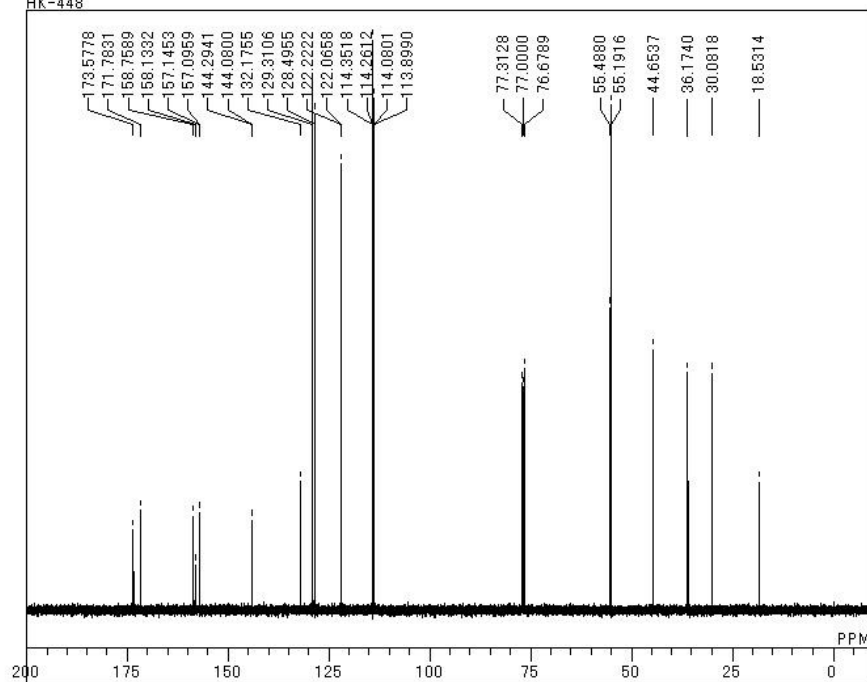

DFILE  
COMNT  
DATIM  
OBNUC  
EXMOD  
OBFRQ  
OBSET  
OBFIN  
POINT  
FREQU  
SCANS  
ACQTM  
PD  
PW1  
IRNUC  
CTEMP  
SLVNT  
EXREF  
BF  
RGAIN

H-1NMR#NewCompound#HK-  
HK-448  
Wed Jan 25 00:32:45 2012  
13C  
BCM  
100.40 MHz  
125.00 KHz  
10500.00 Hz  
32768  
27118.64 Hz  
256  
1.2083 sec  
1.7920 sec  
5.50 usec  
1H  
22.0 c  
CDCL3  
77.00 ppm  
0.12 Hz  
24

F:\NMR\TM-120126-11NON\_E2.als  
heptyl

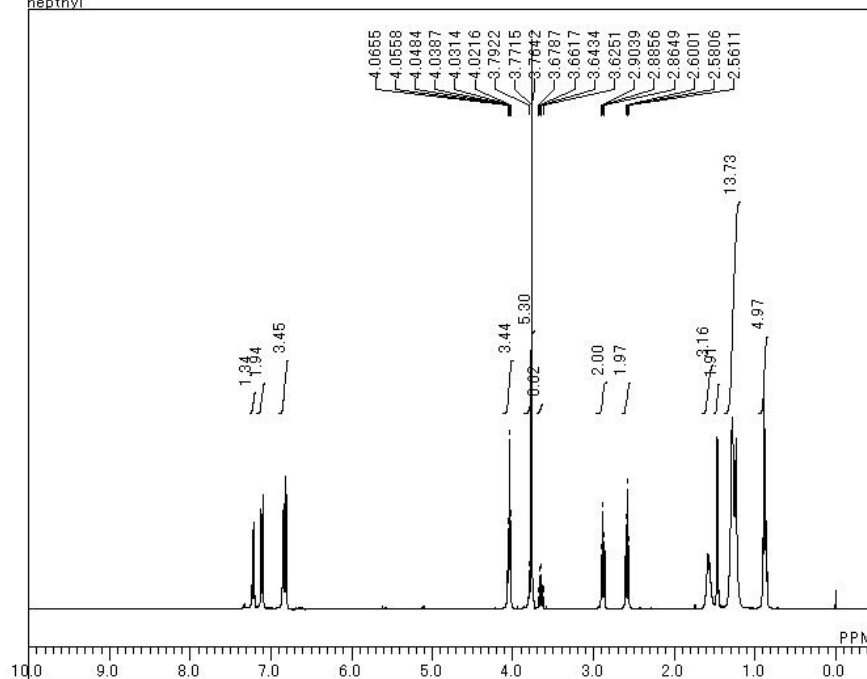

DFILE F:\NMR\TM-120126-11NON  
COMNT heptyl  
DATIM Fri Jan 27 10:45:28 2012  
OBNUC 1H  
EXMOD NON  
OBFRQ 399.65 MHz  
OBSET 124.00 KHz  
OBFIN 10500.00 Hz  
POINT 16384  
FREQU 7992.01 Hz  
SCANS 8  
ACQTM 2.0500 sec  
PD 4.9500 sec  
PW1 6.20 usec  
IRNUC 1H  
CTEMP 23.4 c  
SLVNT CDCL3  
EXREF 0.00 ppm  
BF 0.12 Hz  
RGAIN 6

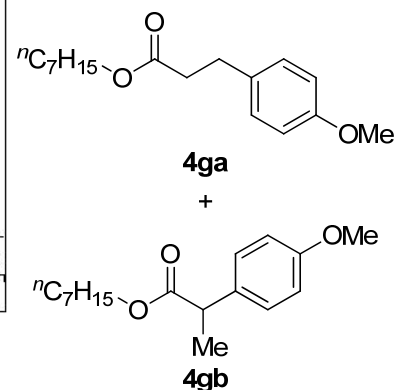

F:\NMR\TM-120206-31BCM\_E8.als  
heptyl-13C

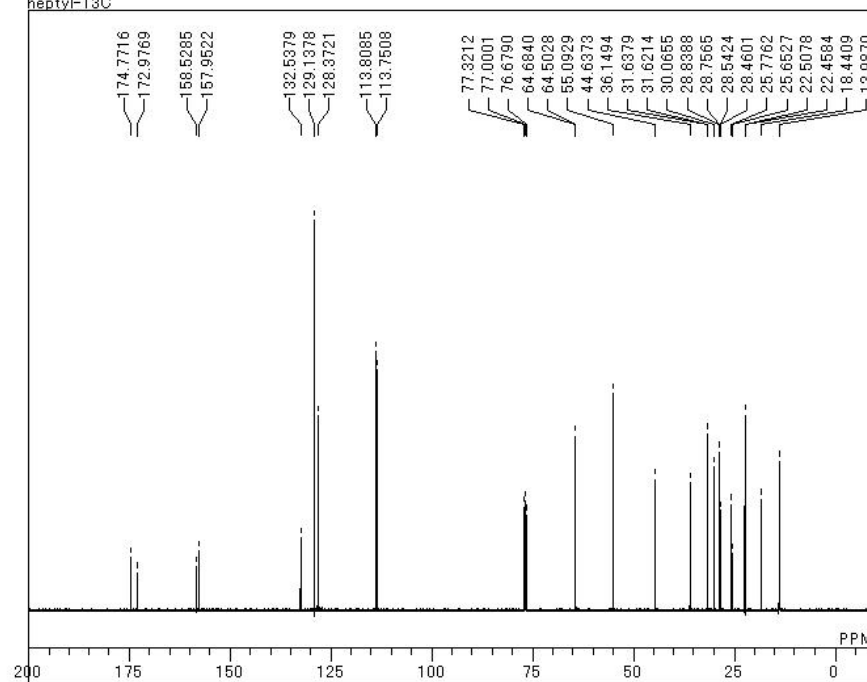

DFILE F:\NMR\TM-120206-31BCM  
COMNT heptyl-13C  
DATIM Tue Feb 07 00:44:59 2012  
OBNUC 13C  
EXMOD BCM  
OBFRQ 100.40 MHz  
OBSET 125.00 KHz  
OBFIN 10500.00 Hz  
POINT 32768  
FREQU 27118.64 Hz  
SCANS 1024  
ACQTM 1.2083 sec  
PD 1.7920 sec  
PW1 5.50 usec  
IRNUC 1H  
CTEMP 19.5 c  
SLVNT CDCL3  
EXREF 13.99 ppm  
BF 0.12 Hz  
RGAIN 26

F:\NMR\TM-120126-31NON\_E15.als  
benzhydrol

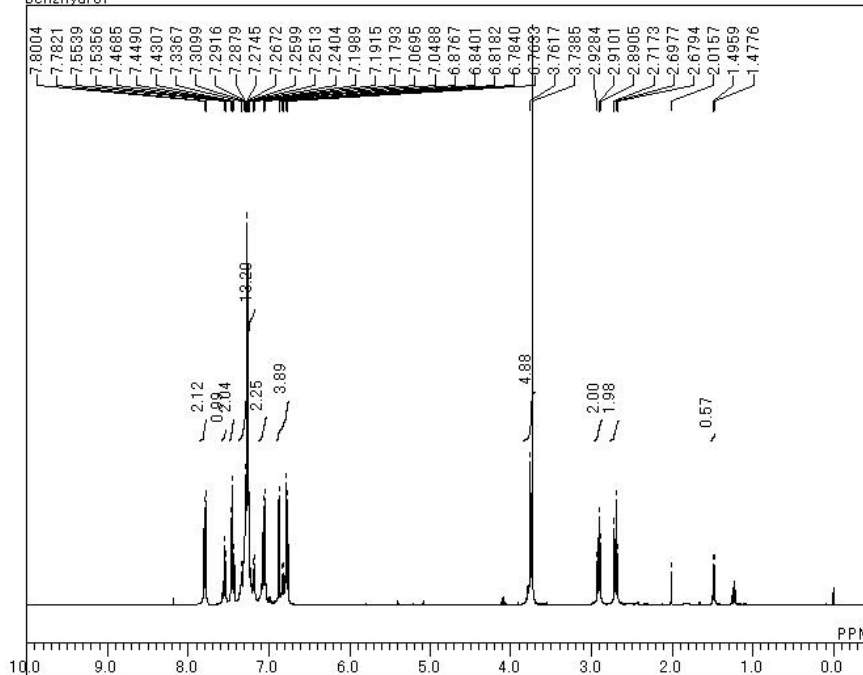

DFILE F:\NMR\TM-120126-31NON  
COMNT benzhydrol  
DATIM Thu Jan 26 13:31:14 2012  
OBNUC 1H  
EXMOD NON  
OBFRQ 399.65 MHz  
OBSET 124.00 KHz  
OBFIN 10500.00 Hz  
POINT 16384  
FREQU 7992.01 Hz  
SCANS 8  
ACQTM 2.0500 sec  
PD 4.9500 sec  
PW1 6.20 usec  
IRNUC 1H  
CTEMP 21.6 c  
SLVNT CDCL3  
EXREF 0.00 ppm  
BF 0.12 Hz  
RGAIN 7

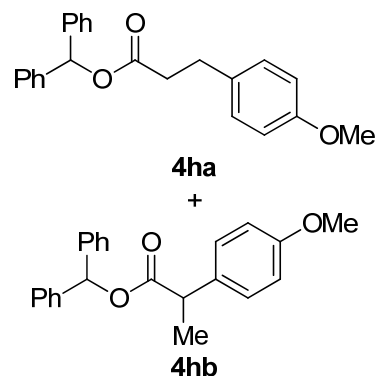

F:\NMR\TM-120206-11BCM\_E7.als  
benzhydrol

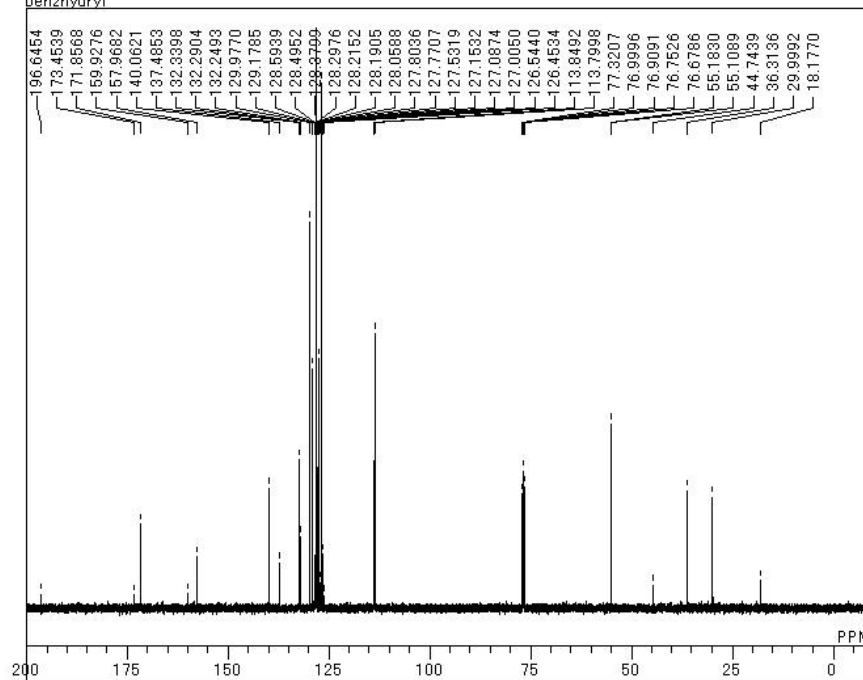

DFILE F:\NMR\TM-120206-11BCM  
COMNT benzhydrol  
DATIM Mon Feb 06 10:31:35 2012  
OBNUC 13C  
EXMOD BCM  
OBFRQ 100.40 MHz  
OBSET 125.00 KHz  
OBFIN 10500.00 Hz  
POINT 32768  
FREQU 27118.64 Hz  
SCANS 512  
ACQTM 1.2083 sec  
PD 1.7920 sec  
PW1 5.50 usec  
IRNUC 1H  
CTEMP 19.4 c  
SLVNT CDCL3  
EXREF 18.18 ppm  
BF 0.12 Hz  
RGAIN 22



F:\NMR\TM-273-111101-11NON\_E9.als  
TM-273-111101-1

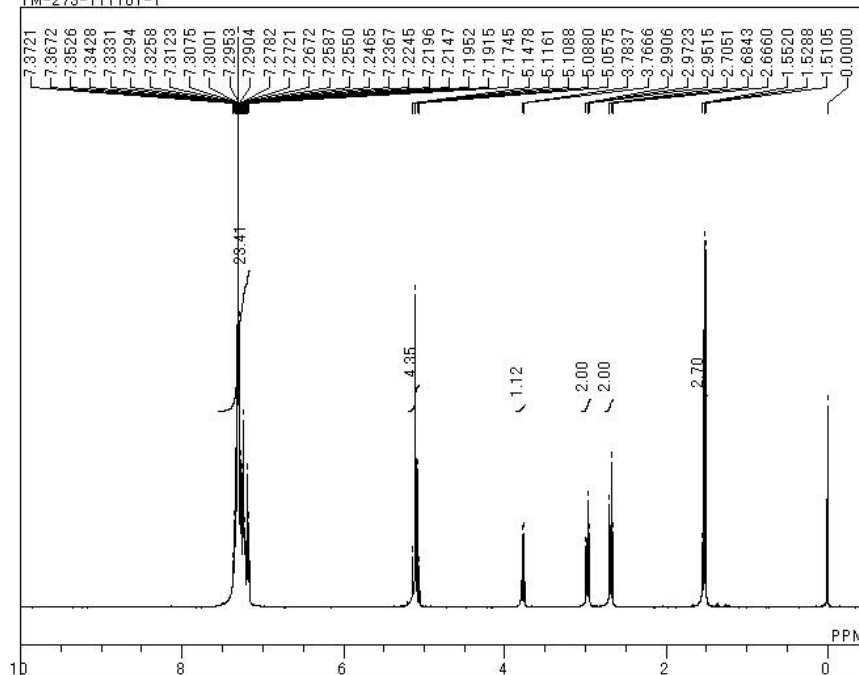

DFILE  
COMNT  
DATIM  
OBNUC  
EXMOD  
OBFRO  
OBSET  
OBFIN  
POINT  
FREQU  
SCANS  
ACQTM  
PD  
PW1  
IRNUC  
CTEMP  
SLVNT  
EXREF  
BF  
RGAIN

F:\NMR\TM-273-111101-11  
TM-273-111101-1  
Tue Nov 01 11:03:24 2011  
1H  
NON  
399.65 MHz  
124.00 KHz  
10500.00 Hz  
16384  
7992.01 Hz  
8  
2.0500 sec  
4.9500 sec  
6.20 usec  
1H  
22.5 c  
CDCL3  
0.00 ppm  
0.12 Hz  
13

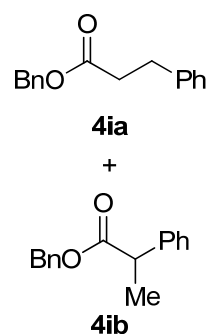

F:\NMR\TM-120827-51BCM\_E1 6.als  
TM-120827-5

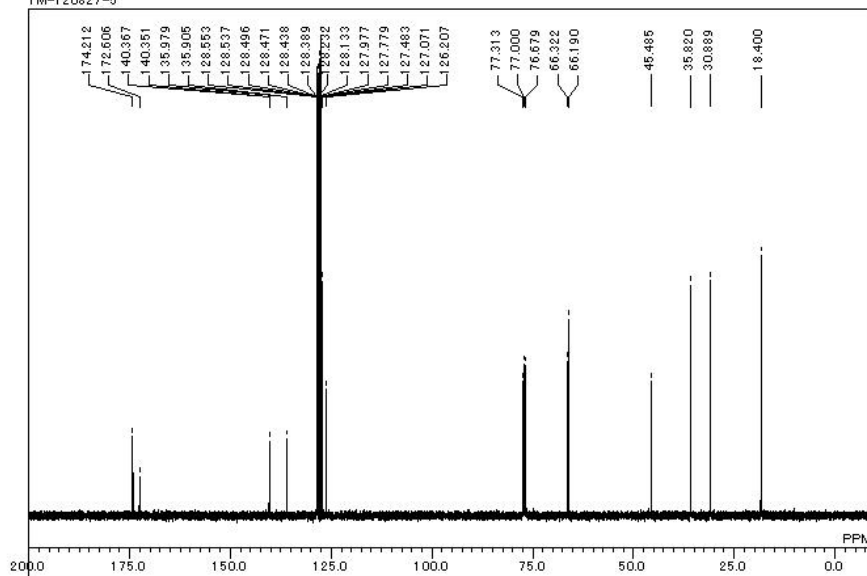

DFILE  
COMNT  
DATIM  
OBNUC  
EXMOD  
OBFRO  
OBSET  
OBFIN  
POINT  
FREQU  
SCANS  
ACQTM  
PD  
PW1  
IRNUC  
CTEMP  
SLVNT  
EXREF  
BF  
RGAIN

F:\NMR\TM-120827-51BCM\_E1 6.als  
TM-120827-5  
Mon Aug 27 12:42:54 2012  
13C  
BCM  
100.40 MHz  
125.00 KHz  
10500.00 Hz  
32768  
27118.54 Hz  
256  
1.2083 sec  
1.7920 sec  
5.50 usec  
1H  
27.9 c  
ODCL3  
77.00 ppm  
0.12 Hz  
28

F:\NMR\TM-120119-21NON\_E27.als  
dodecyl

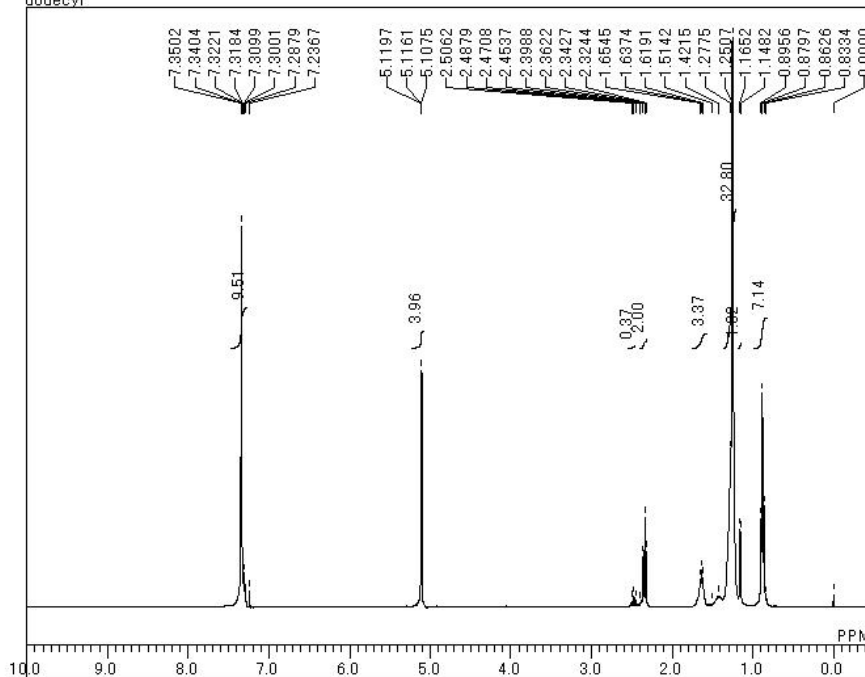

DFILE F:\NMR\TM-120119-21NON  
COMNT dodecyl  
DATIM Thu Jan 19 15:20:52 2012  
OBNUC 1H  
EXMOD NON  
OBFRQ 399.65 MHz  
OBSET 124.00 KHz  
OBFIN 10500.00 Hz  
POINT 16384  
FREQU 7992.01 Hz  
SCANS 8  
ACQTM 2.0500 sec  
PD 4.9500 sec  
PW1 6.20 usec  
IRNUC 1H  
CTEMP 21.9 c  
SLVNT CDCL3  
EXREF 0.00 ppm  
BF 0.12 Hz  
RGAIN 6

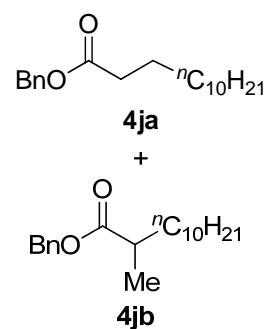

F:\NMR\TM-210119-1.1  
dodecene

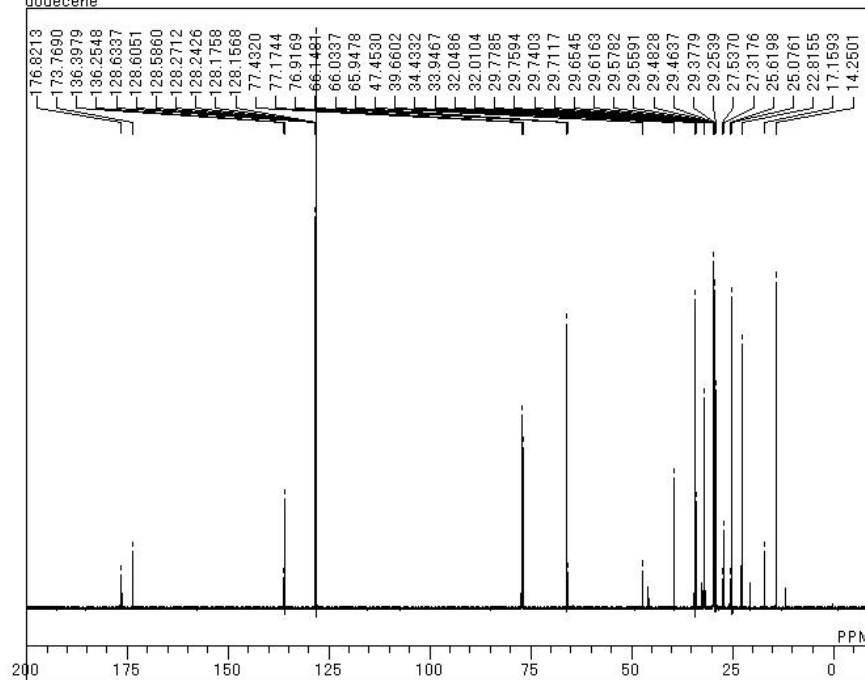

DFILE F:\NMR\TM-210119-1.1  
COMNT dodecene  
DATIM 19-01-2012 20:42:05  
OBNUC 13C  
EXMOD single\_pulse\_dec  
OBFRQ 125.77 MHz  
OBSET 7.87 KHz  
OBFIN 4.21 Hz  
POINT 32768  
FREQU 39308.18 Hz  
SCANS 1000  
ACQTM 0.8336 sec  
PD 1.5000 sec  
PW1 3.33 usec  
IRNUC 1H  
CTEMP 19.3 c  
SLVNT CDCL3  
EXREF 47.45 ppm  
BF 0.12 Hz  
RGAIN 58

F:\NMR\TM-261-111012-11NON\_E4.als  
TM-261-111012-1

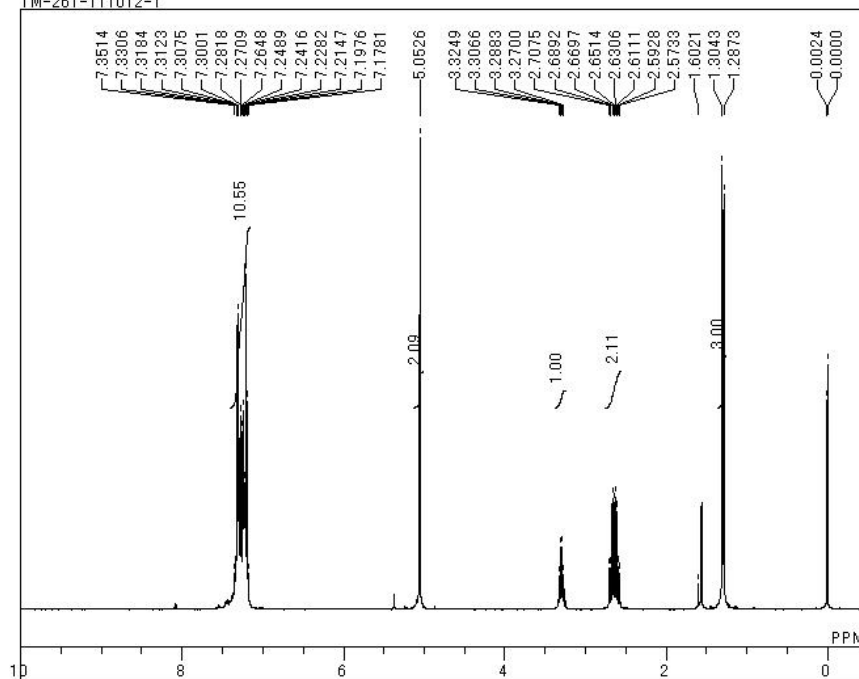

D:\FILE  
COMNT  
DATIM  
OBNUC  
EXMOD  
OBFRO  
OBSET  
OBFIN  
POINT  
FREQU  
SCANS  
AQTM  
PD  
PW1  
IRNUC  
CTEMP  
SLVNT  
EXREF  
BF  
RGAIN

F:\NMR\TM-261-111012-11  
TM-261-111012-1  
Wed Oct 12 13:44:52 2011  
1H  
NON  
399.65 MHz  
124.00 KHz  
10500.00 Hz  
16384  
7992.01 Hz  
8  
2.0500 sec  
4.9500 sec  
6.20 usec  
1H  
24.4 c  
CDCL3  
0.00 ppm  
0.12 Hz  
13

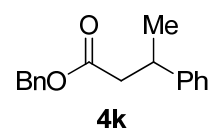

F:\NMR\TM-120827-21BCM\_E6.als  
TM-120827-2-13G

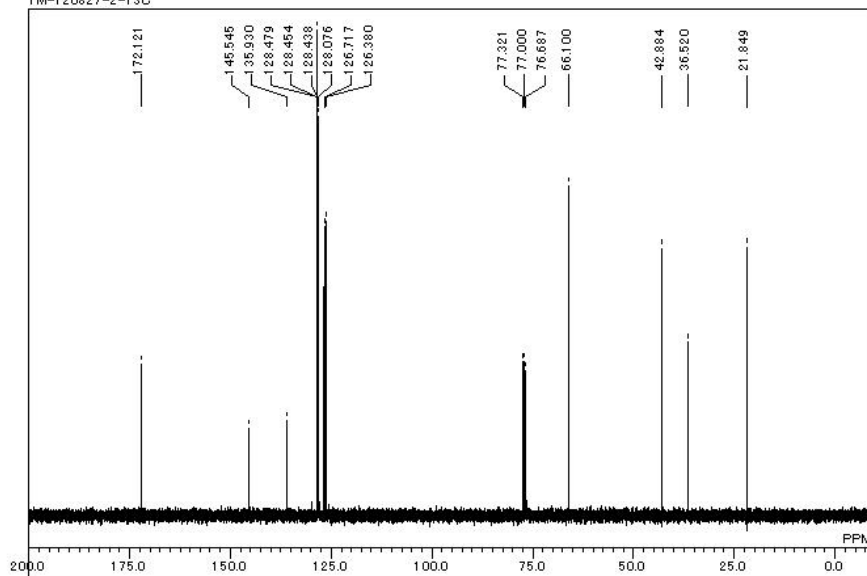

D:\FILE  
COMNT  
DATIM  
OBNUC  
EXMOD  
OBFRO  
OBSET  
OBFIN  
POINT  
FREQU  
SCANS  
AQTM  
PD  
PW1  
IRNUC  
CTEMP  
SLVNT  
EXREF  
BF  
RGAIN

F:\NMR\TM-120827-21BCM\_E6.als  
TM-120827-2-13G  
Mon Aug 27 10:21:55 2012  
13C  
BCM  
100.40 MHz  
125.00 KHz  
10500.00 Hz  
32768  
27118.64 Hz  
206  
1.2083 sec  
1.7920 sec  
5.50 usec  
1H  
27.9 c  
ODCL3  
77.00 ppm  
0.12 Hz  
28

F:\NMR\TM-255-111006-11NON\_E2.als  
TM-255-111006-1

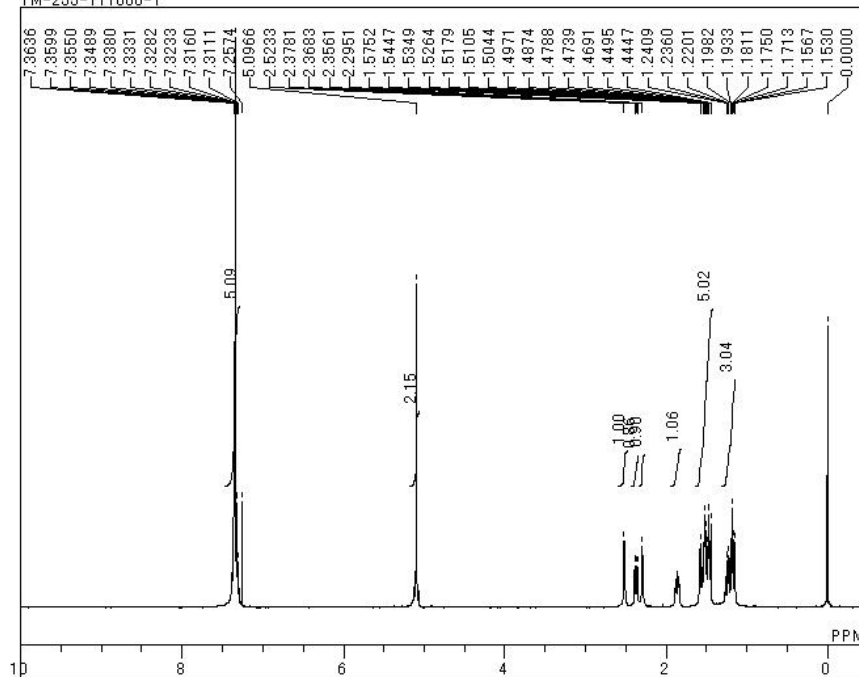

DFILE F:\NMR\TM-255-111006-11  
COMNT TM-255-111006-1  
DATIM Fri Oct 07 00:12:42 2011  
OBNUC 1H  
EXMOD NON  
OBFRQ 399.65 MHz  
OBSET 124.00 KHz  
OBFIN 10500.00 Hz  
POINT 16384  
FREQU 7992.01 Hz  
SCANS 8  
AQTM 2.0500 sec  
PD 4.9500 sec  
PWI 6.20 usec  
IRNUC 1H  
CTEMP 24.6 c  
SLVNT CDCL3  
EXREF 0.00 ppm  
BF 0.12 Hz  
RGAIN 14

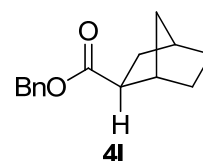

F:\NMR\TM-120827-11BCM\_E5.als  
TM-120827-1-13C

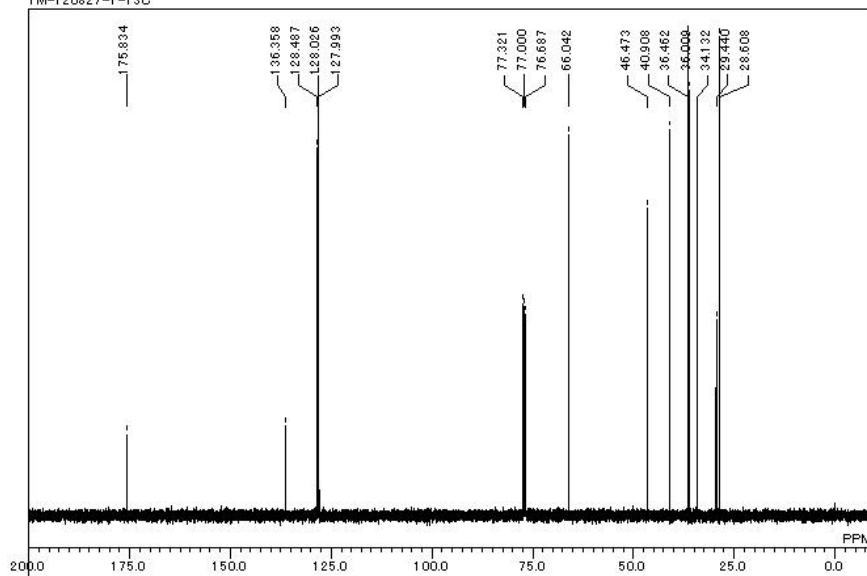

DFILE F:\NMR\TM-120827-11BCM\_E5.als  
COMNT TM-120827-1-13C  
DATIM Mon Aug 27 10:03:02 2012  
OBNUC 13C  
EXMOD BCM  
OBFRQ 100.40 MHz  
OBSET 125.00 KHz  
OBFIN 10500.00 Hz  
POINT 32768  
FREQU 27118.64 Hz  
SCANS 206  
AQTM 1.2083 sec  
PD 1.7920 sec  
PWI 5.50 usec  
IRNUC 1H  
CTEMP 28.1 c  
SLVNT CDCL3  
EXREF 77.00 ppm  
BF 0.12 Hz  
RGAIN 27

F:\NMR\TM-120125-11NON\_E10.als

indene

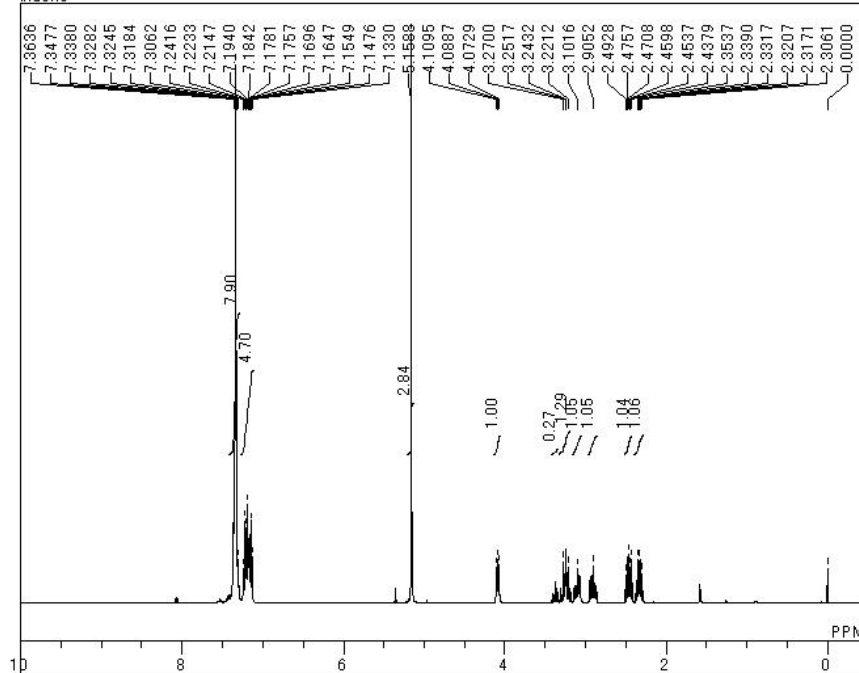

DFILE  
COMNT  
DATIM  
OBNUC  
EXMOD  
OBFRO  
OBSET  
OBFIN  
POINT  
FREQU  
SCANS  
ACQTM  
PD  
PW1  
IRNUC  
CTEMP  
SLVNT  
EXREF  
BF  
RGAIN

F:\NMR\TM-120125-11NON  
indene  
Wed Jan 25 12:05:42 2012  
1H  
NON  
399.65 MHz  
124.00 KHz  
10500.00 Hz  
16384  
7992.01 Hz  
8  
2.0500 sec  
4.9500 sec  
6.20 usec  
1H  
22.0 c  
CDCL3  
0.00 ppm  
0.12 Hz  
10

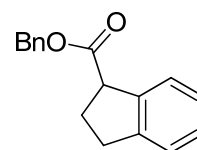

4ma

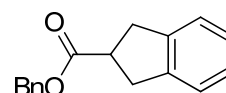

4mb

F:\NMR\TM-120125-1.1

indene

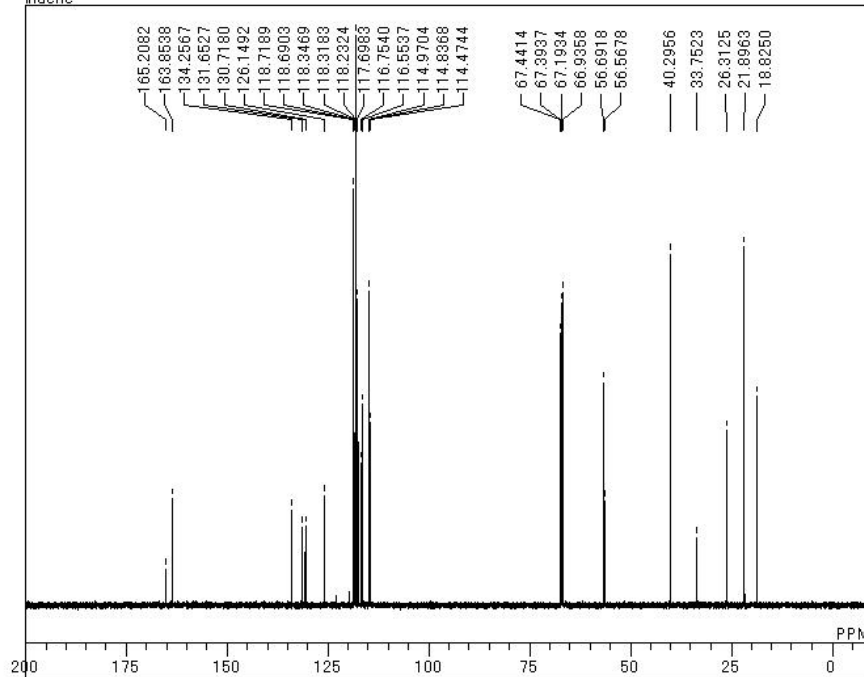

DFILE  
COMNT  
DATIM  
OBNUC  
EXMOD  
OBFRO  
OBSET  
OBFIN  
POINT  
FREQU  
SCANS  
ACQTM  
PD  
PW1  
IRNUC  
CTEMP  
SLVNT  
EXREF  
BF  
RGAIN

F:\NMR\TM-120125-1.1  
indene  
25-01-2012 16:45:20  
13C  
single\_pulse\_dec  
125.77 MHz  
7.87 KHz  
4.21 Hz  
32768  
39308.18 Hz  
500  
0.8336 sec  
1.5000 sec  
3.33 usec  
1H  
19.7 c  
CDCL3  
18.83 ppm  
0.12 Hz  
60

F:\NMR\TM-318-120105-21NON\_E7.als  
TM-318-120105-1

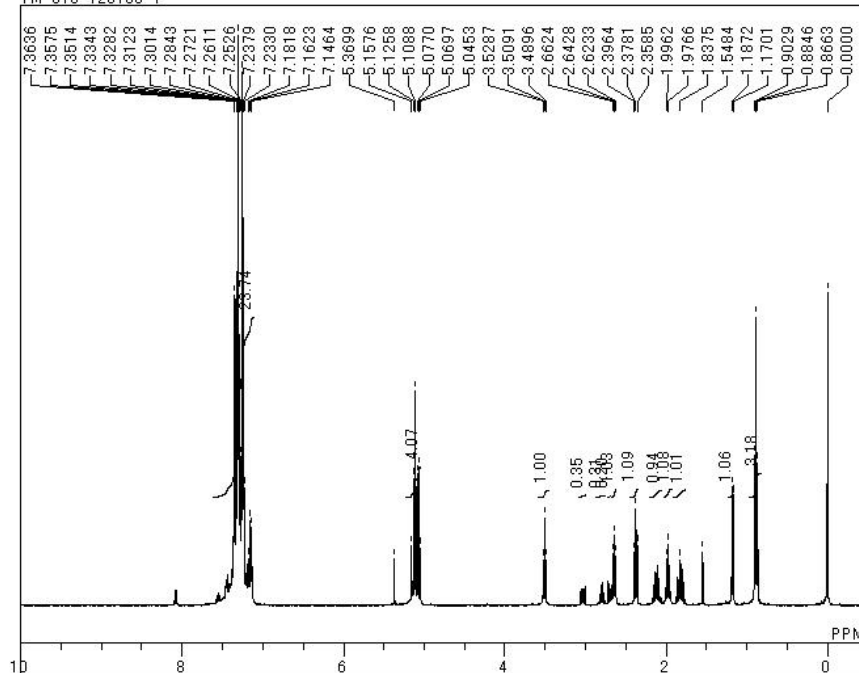

DFILE  
COMNT  
DATIM  
OBNUC  
EXMOD  
OBFRO  
OBSET  
OBFIN  
POINT  
FREQU  
SCANS  
ACQTM  
PD  
PW1  
IRNUC  
CTEMP  
SLVNT  
EXREF  
BF  
RGAIN

F:\NMR\TM-318-120105-21  
TM-318-120105-1  
Thu Jan 05 20:05:27 2012  
1H  
NON  
399.65 MHz  
124.00 KHz  
10500.00 Hz  
16384  
7992.01 Hz  
8  
2.0500 sec  
4.9500 sec  
6.20 usec  
1H  
22.2 c  
CDCL3  
0.00 ppm  
0.12 Hz  
15

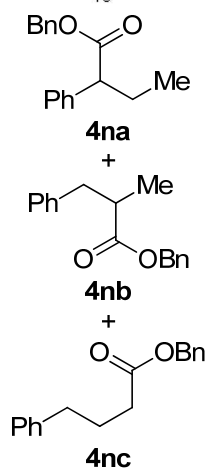

F:\NMR\TM-120827-3-11BOM\_E1 5.als  
TM-120827-3-1-13D

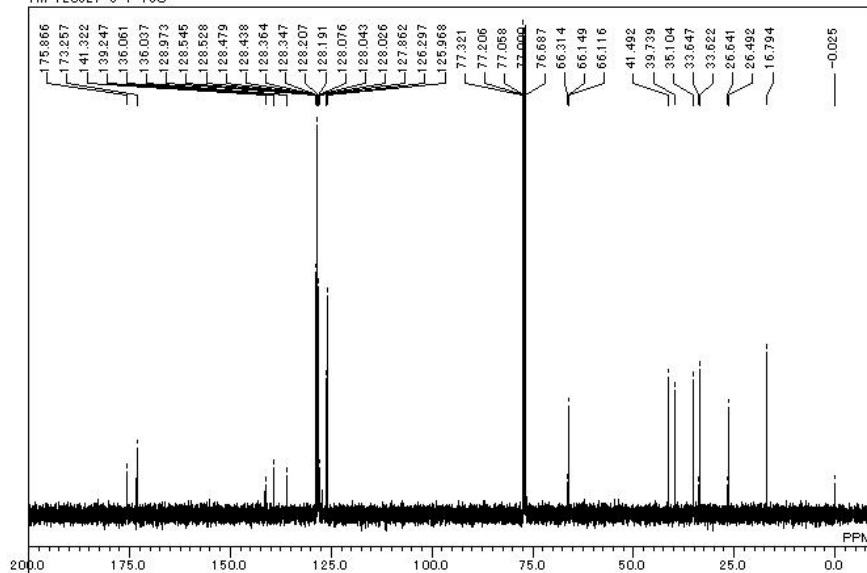

DFILE  
COMNT  
DATIM  
OBNUC  
EXMOD  
OBFRO  
OBSET  
OBFIN  
POINT  
FREQU  
SCANS  
ACQTM  
PD  
PW1  
IRNUC  
CTEMP  
SLVNT  
EXREF  
BF  
RGAIN

F:\NMR\TM-120827-3-11BOM\_E1  
TM-120827-3-1-13D  
Mon Aug 27 12:22:28 2012  
13C  
BOM  
100.40 MHz  
125.00 KHz  
10500.00 Hz  
32768  
27118.64 Hz  
512  
1.2083 sec  
1.7920 sec  
5.50 usec  
1H  
27.8 c  
CDCL3  
77.00 ppm  
0.12 Hz  
28

## 7. References

- (1) Sofuku, S.; Muramatsu, I.; Hagitani, A. *Bull. Chem. Soc. Jpn.* **1967**, *40*, 2942–2945.
- (2) Shi, M.; Shen, Y. M. *Molecules* **2002**, *7*, 386–393.
- (3) Ochiai, M.; Yoshimura, A.; Miyamoto, K.; Hayashi, S.; Nakanishi, W. *J. Am. Chem. Soc.* **2010**, *132*, 9236–9239.
- (4) Katafuchi, Y.; Fujihara, T.; Iwai, T.; Terao, J.; Tsuji, Y. *Adv. Synth. Catal.* **2011**, *353*, 475–482.
- (5) Shirini, F.; Zolfigol, M. A.; Safari, A. *J. Chem. Res.* **2006**, 154–156.
- (6) Scherg, T.; Schneider, S. K.; Frey, G. D.; Schwarz, J.; Herdtweck, E.; Herrmann, W. A. *Synlett* **2006**, 2894–2907.
- (7) Liao, C.; Zhu, X.; Sun, X.-G.; Dai, S. *Tetrahedron Lett.* **2011**, *41*, 5308–5310.
- (8) Nguyen, D. Q.; Bae, H. W.; Jeon, E. H.; Lee, J. S.; Cheong, M.; Kim, H.; Kim, H. S.; Lee, H. J. *Power Sources* **2008**, *183*, 303–309.
- (9) Ogino, K.; Kashiwara, N.; Ueda, T.; Isaka, T.; Yoshida, T.; Tagaki, W. *Bull. Chem. Soc. Jpn.* **1992**, *65*, 373–384.
- (10) Ram, R. N.; Meher, N. K. *Tetrahedron* **2002**, *58*, 2997–3001.
- (11) Albert, S.; Horbach, R.; Deising, H. B.; Siewert, B.; Csuk, R. *Bioorg. Med. Chem.* **2011**, *19*, 5155–5166.
- (12) Gligorich, K. M.; Schultz, M. J.; Sigman, M. S. *J. Am. Chem. Soc.* **2006**, *128*, 2794–2795.
- (13) Suzuki, Y.; Takahashi, H. *Chem. Pharm. Bull.* **1983**, *31*, 1751–1753.
- (14) Gauthier, D.; Lindhardt, A. T.; Olsen, E. P. K.; Overgaard, J.; Skrydstrup, T. *J. Am. Chem. Soc.* **2010**, *132*, 7998–8009.
- (15) Van, T. N.; Debenedetti, S.; Kimpe, N. D. *Tetrahedron Lett.* **2003**, *44*, 4199–4202.
- (16) Jones, R. M.; Water, R. W. V. D.; Lindsey, C. C.; Hoarau, C.; Ung, T.; Pettus, T. R. R. *J. Org. Chem.* **2001**, *66*, 3435–3441.
- (17) Fan, J.; Wang, Z. *Chem. Commun.* **2008**, *42*, 5381–5383.
- (18) Wang, X.; Guram, A.; Caille, S.; Hu, J.; Preston, J. P.; Ronk, M.; Walker, S. *Org. Lett.* **2011**, *13*, 1881–1883.
- (19) Vece, V.; Ricci, J.; Poulain-Martini, S.; Nava, P.; Carissan, Y.; Humbel, S.; Duñach, E. *Eur. J. Org. Chem.* **2010**, *32*, 6239–6248.
- (20) Anastasiou, D.; Jackson, W. R. *Aust. J. Chem.* **1992**, *45*, 21–37.
- (21) Perez-Serrano, L.; Blanco-Urgoiti, J.; Casarrubios, L.; Dominguez, G.; Perez-Castells, J. *J. Org. Chem.* **2000**, *32*, 6239–6248.
- (22) Maki, B. E.; Chan, A.; Scheidt, K. A. *Synthesis* **2008**, 1306–1315.
- (23) Felpin, F. X.; Fouquet, E. *Chem. Eur. J.* **2010**, *16*, 12440–12445.
- (24) Liu, C.; He, C.; Shi, W.; Chan, M.; Lei, A. *Org. Lett.* **2007**, *9*, 5601–5604.
- (25) Bergdahl, M.; Lindstedt, E. L.; Nilsson, M. *Tetrahedron* **1988**, *44*, 2055–2062.
- (26) Kondo, T.; Okada, T.; Mitsudo, T. *Organometallics* **1999**, *18*, 4123–4127.
- (27) Xiang, J.; Orita, A.; Otera, J. *Angew. Chem. Int. Ed.* **2002**, *41*, 4117–4119.
- (28) Jefford, C. W.; Bernardinelli, G.; Wang, Y.; Spellmeyer, D. C.; Buda, A.; Houk, K. N. *J. Am. Chem. Soc.* **1992**, *114*, 1157–1165.
- (29) Métay, E.; Léonel, E.; Sulpice-Gaillet, C.; Nédélec, J. *Synthesis* **2005**, 1682–1688.
- (30) Rewcastle, G. W.; Atwell, G. J.; Baguley, B. C.; Boyd, M.; Thomsen, L. L.; Zhuang, L.; Denny, W. A. *J. Med. Chem.* **1991**, *34*, 2864–2870.

- (31) Zeitler, K.; Rose, C. A. *J. Org. Chem.* **2009**, *74*, 1759–1762.
- (32) Yoneda, E.; Sugioka, T.; Hirao, K.; Zhang, S. W.; Takahashi, S. *J. Chem. Soc. Perkin Trans. 1* **1998**, *3*, 477–484.
- (33) Rioz-Martinez, A.; de Gonzalo, G.; Torres Pazmiño, D. E.; Fraaije, M. W.; Gotor, V. *J. Org. Chem.* **2010**, *75*, 2073–2076.
- (34) Amyes, T. L.; Kirby, A. J. *J. Am. Chem. Soc.* **1988**, *110*, 6505–6514.
- (35) Adam, W.; Peters, K.; Sauter, M. *Synthesis* **1994**, 111–119.
- (36) Park, J. O.; Youn, S. W. *Org. Lett.* **2010**, *12*, 2258–2261.
- (37) Thomson, J. E.; Kyle, A. F.; Gallagher, K. A.; Lenden, P.; Concellon, C.; Morrill, L. C.; Miller, A. J.; Joannesse, C.; Slawin, A. M. Z.; Smith, A. D. *Synthesis* **2008**, 2805–2818.
- (38) Adam, W.; Ahrweiler, M.; Sauter, M. *Chem. Ber.* **1994**, *127*, 941–946.
